# Supplementary material for: Investigation of Novel Pesticides with Insecticidal and Antifungal Activities: Design, Synthesis and SAR Studies of Benzoylpyrimidinylurea Derivatives
Source: MDPI journal article supplement (doi:10.3390/molecules23092203), 2018-08-31
Supplement: s1 [file s1]

## Electronic Supporting Information (ESI) for:

Investigation of novel pesticides with insecticidal and antifungal activity: design, synthesis and SAR studies of novel benzoyl pyrimidinylurea derivatives

| Content                                                                                                                     | Page |
|-----------------------------------------------------------------------------------------------------------------------------|------|
| <sup>1</sup> H-NMR and <sup>13</sup> C-NMR Spectra for<br>compounds <b>Iap</b> , <b>32a</b> , <b>1-38</b>                   | 2-52 |
| Photos for Protective activity of compounds against<br><i>Sclerotinia sclerotiorum</i> on leaves of <i>Brassica olerace</i> | 53   |

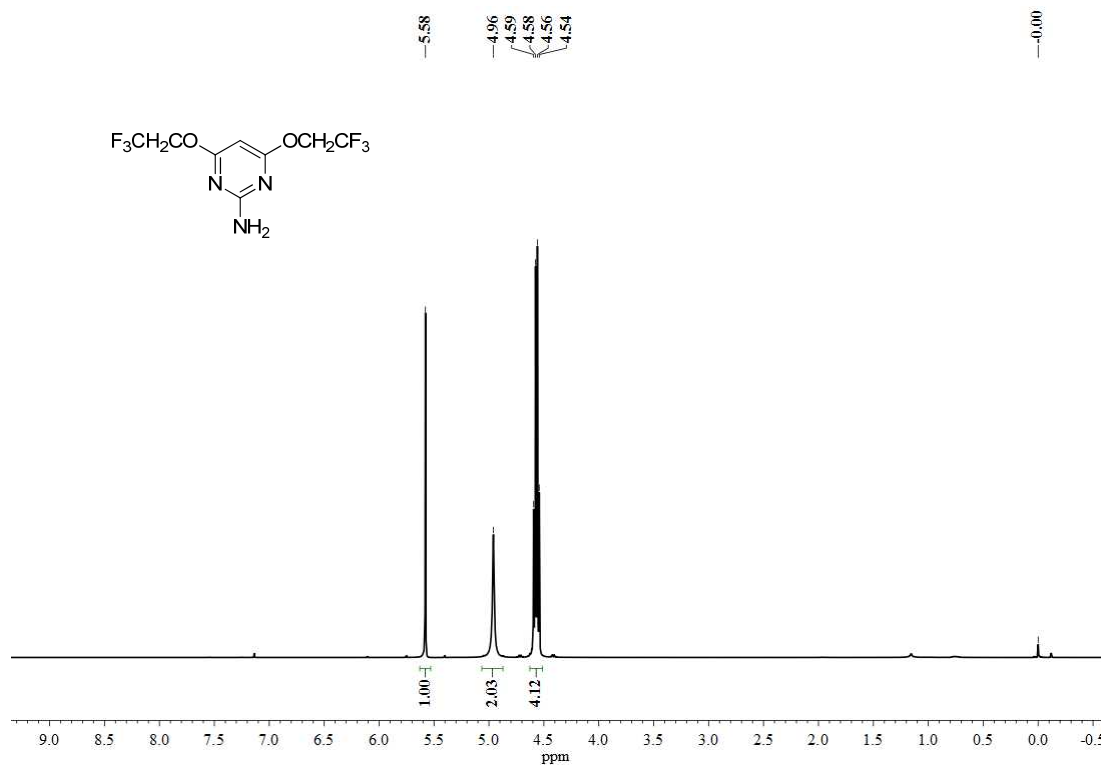

Figure S1 <sup>1</sup>H NMR spectra of compound Ia

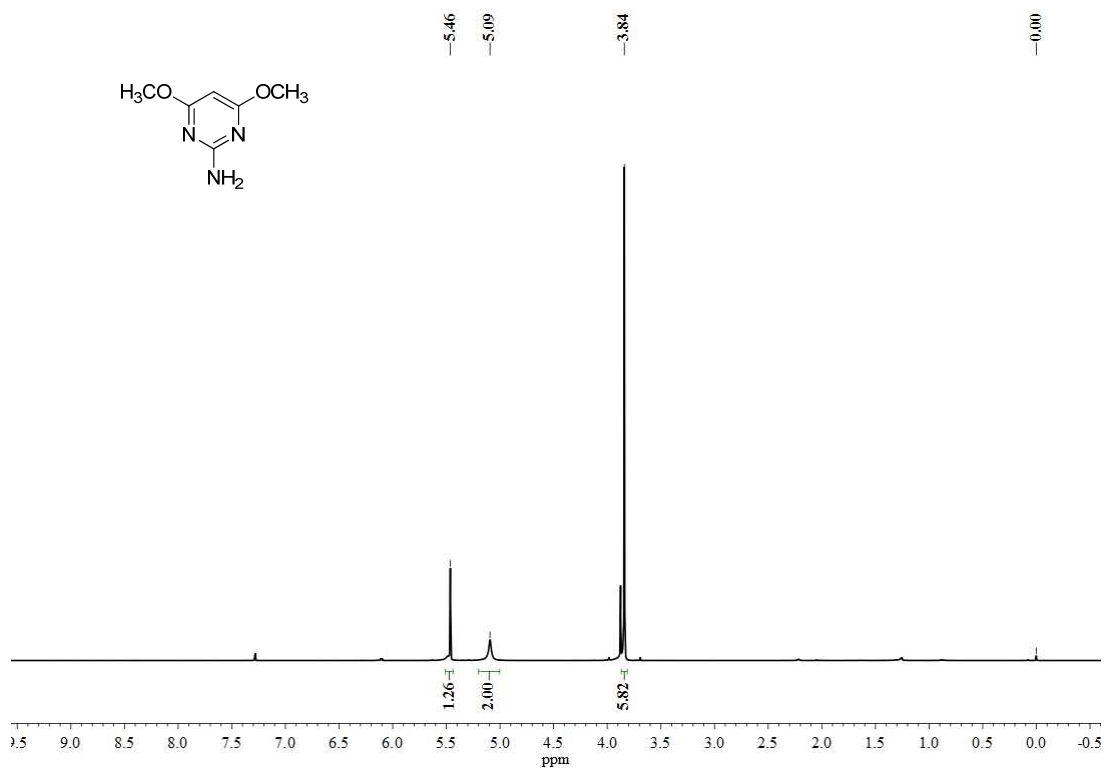

Figure S2 <sup>1</sup>H NMR spectra of compound Ib

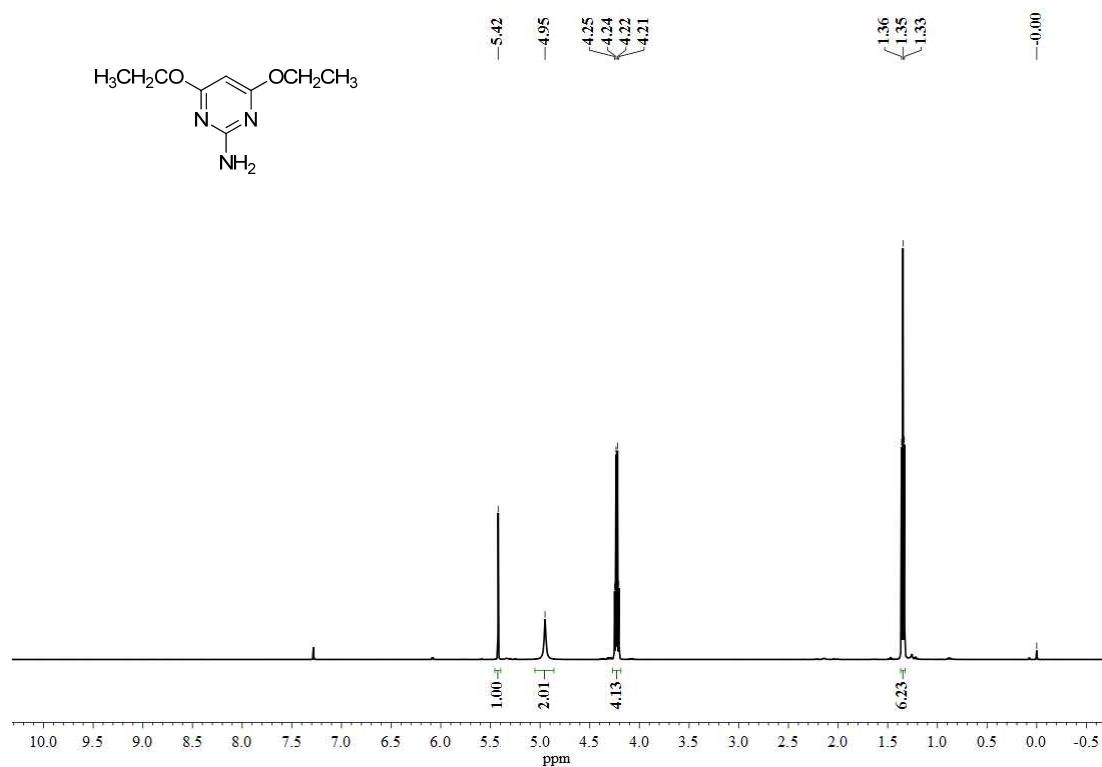

Figure S3 <sup>1</sup>H NMR spectra of compound Ic

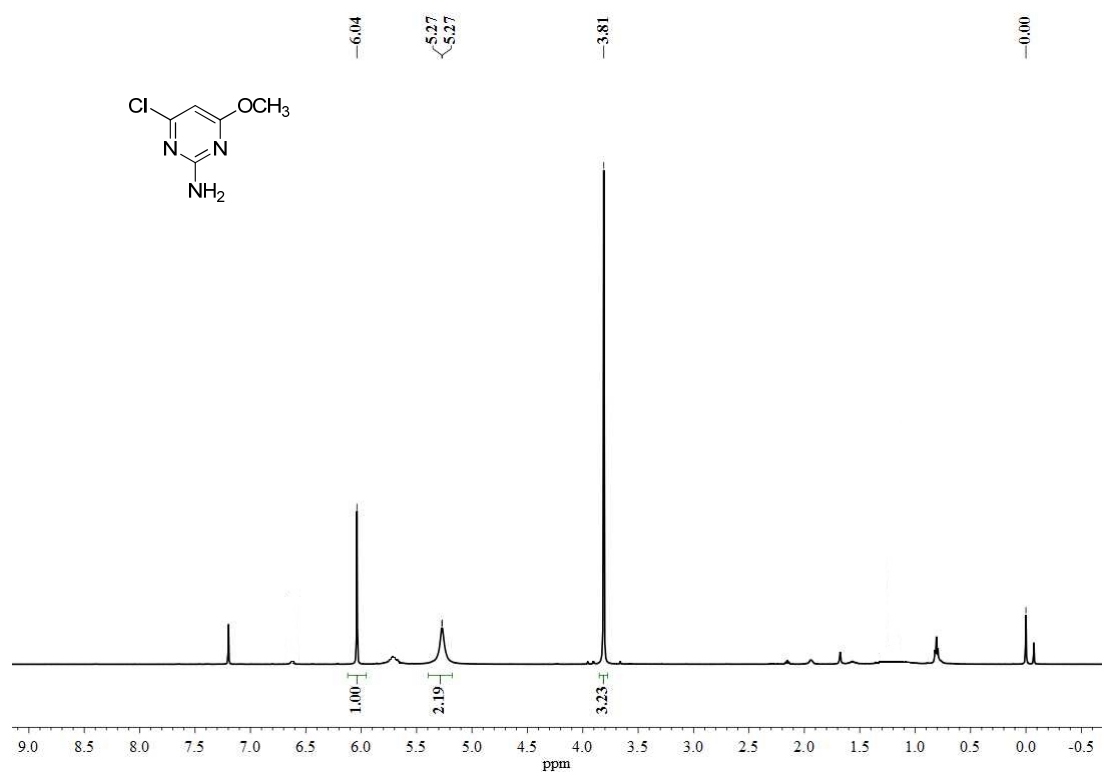

Figure S4 <sup>1</sup>H NMR spectra of compound Id

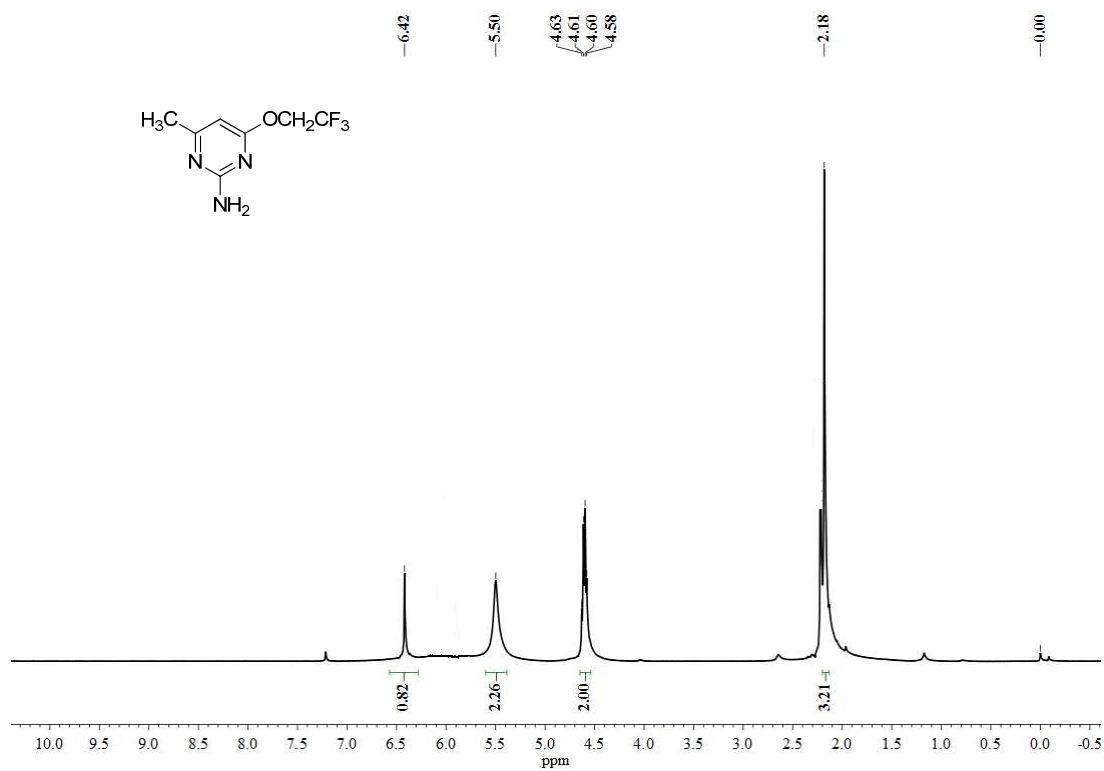

Figure S5 <sup>1</sup>H NMR spectra of compound **Ie**

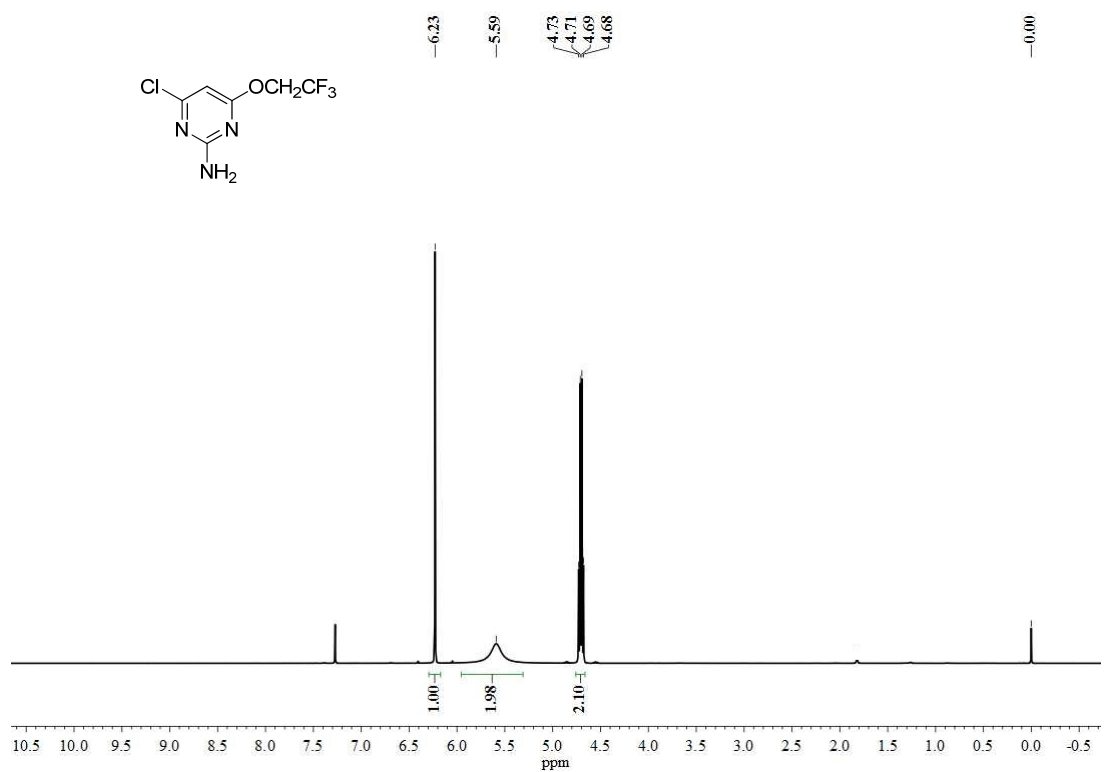

Figure S6 <sup>1</sup>H NMR spectra of compound **If**

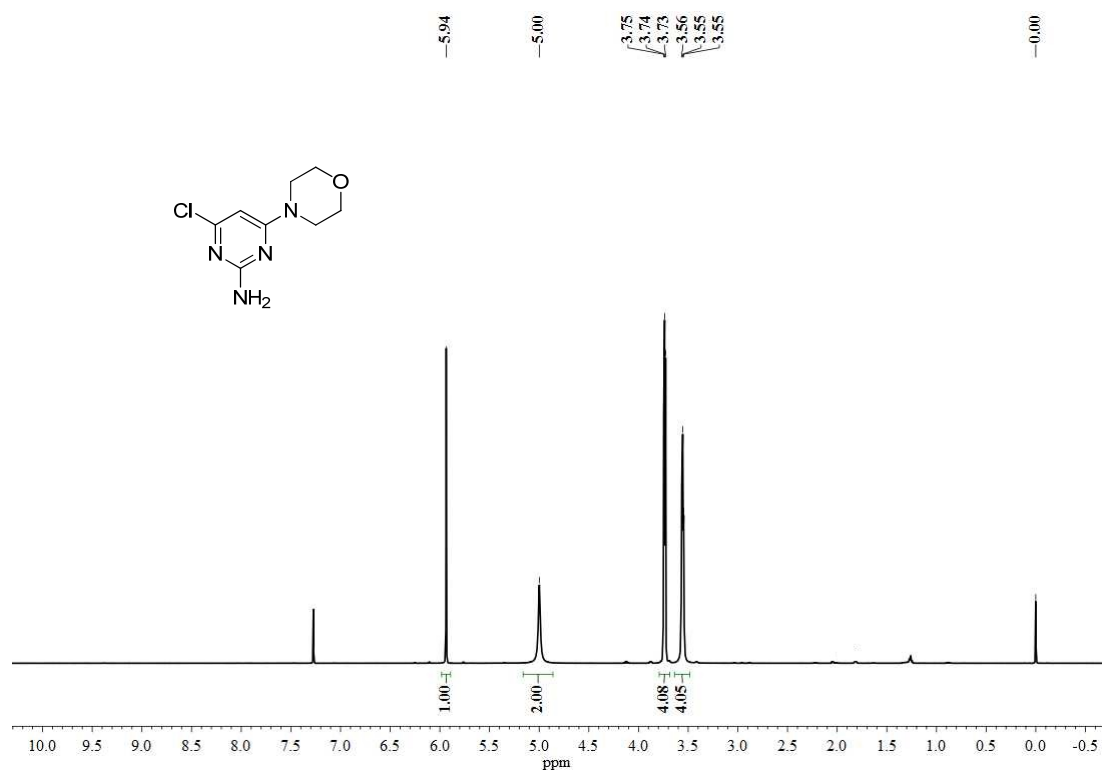

Figure S7 <sup>1</sup>H NMR spectra of compound Ig

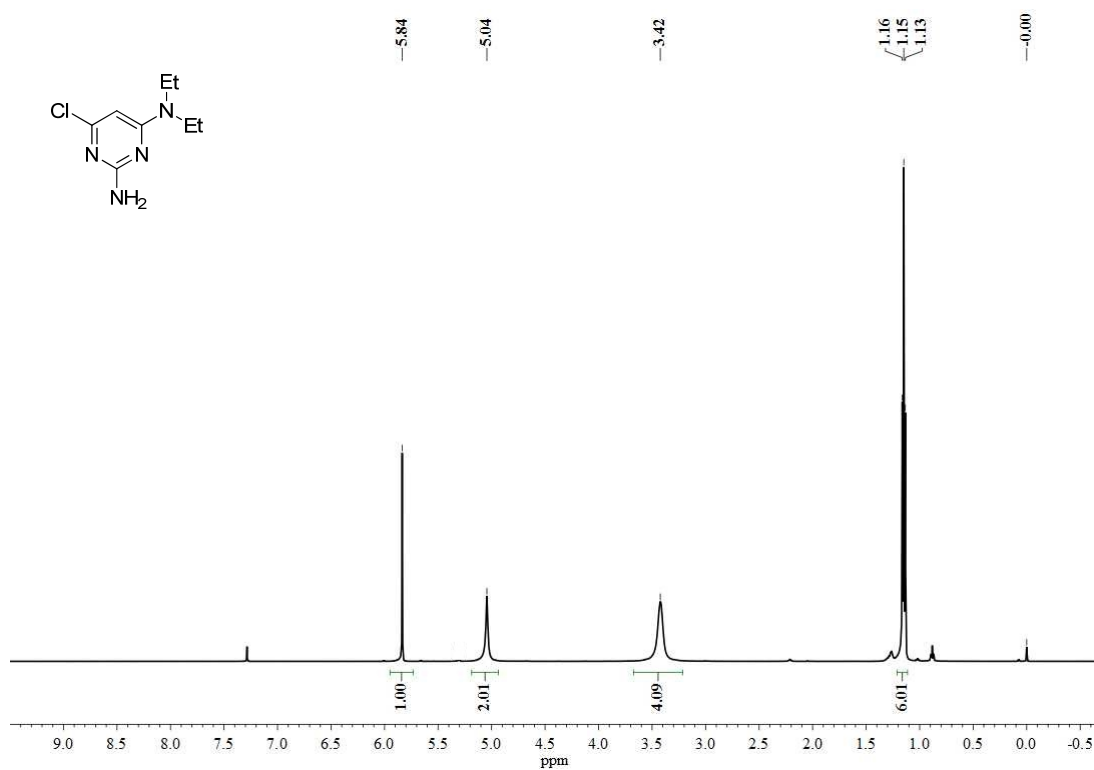

Figure S8 <sup>1</sup>H NMR spectra of compound Ih

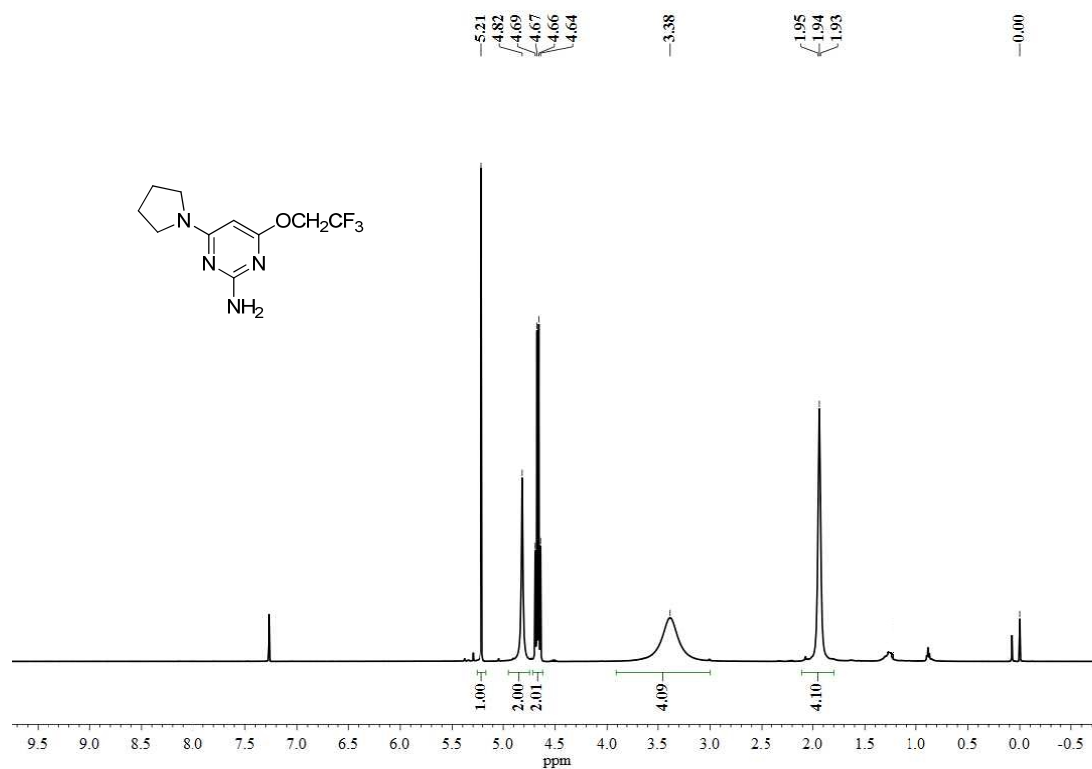

Figure S9 <sup>1</sup>H NMR spectra of compound Ii

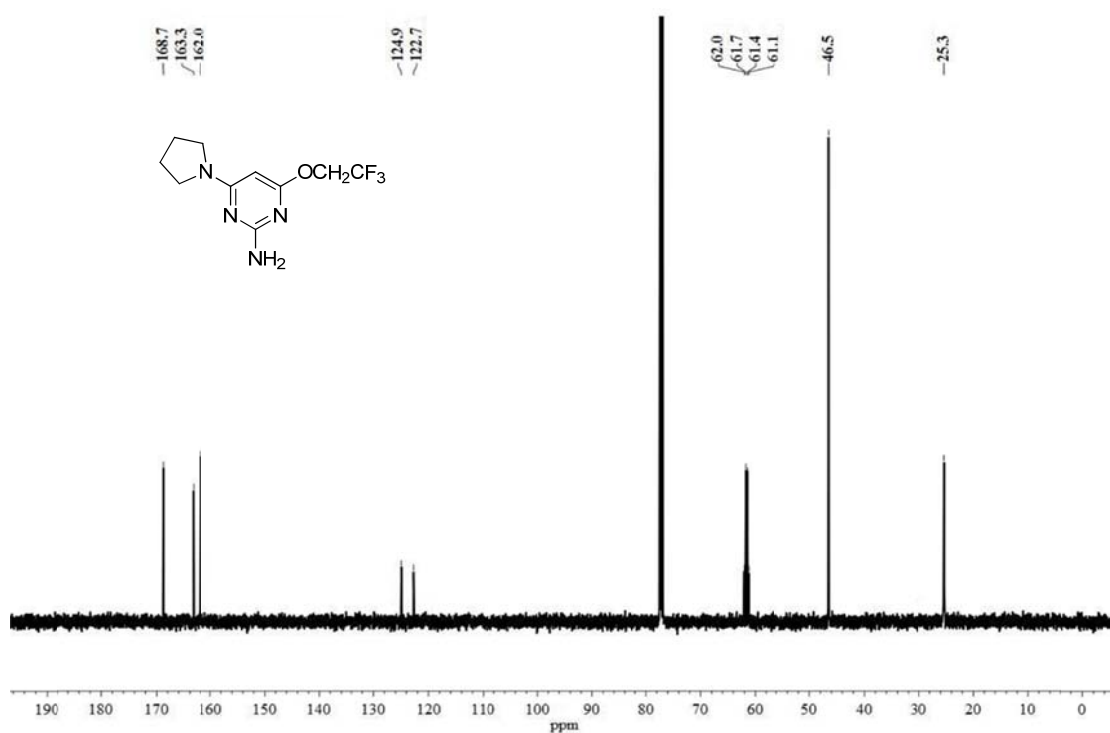

Figure S10 <sup>13</sup>C NMR spectra of compound Ii

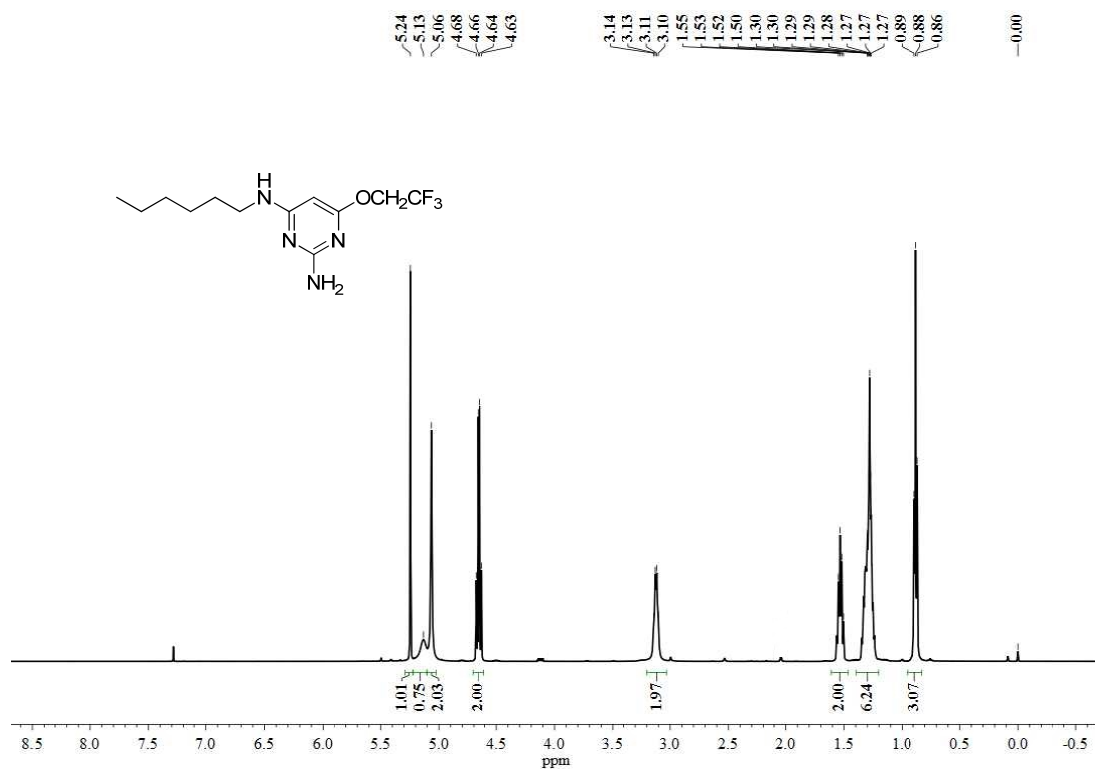

Figure S11 <sup>1</sup>H NMR spectra of compound Ij

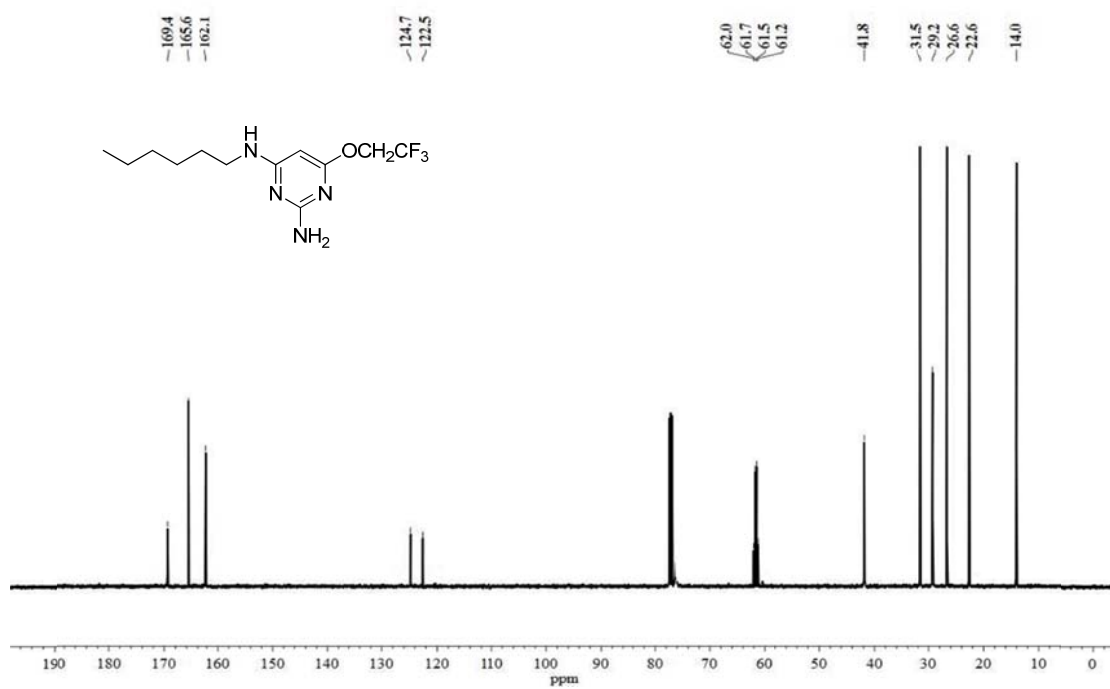

Figure S12 <sup>13</sup>C NMR spectra of compound Ij

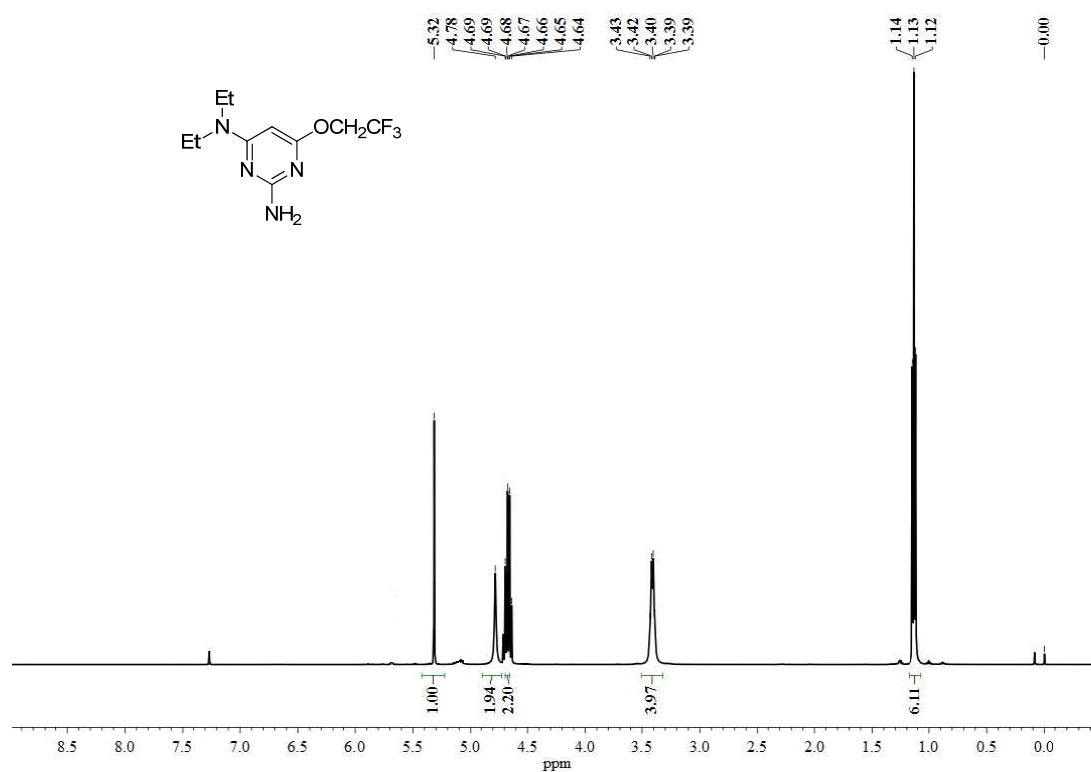

Figure S13 <sup>1</sup>H NMR spectra of compound Ik

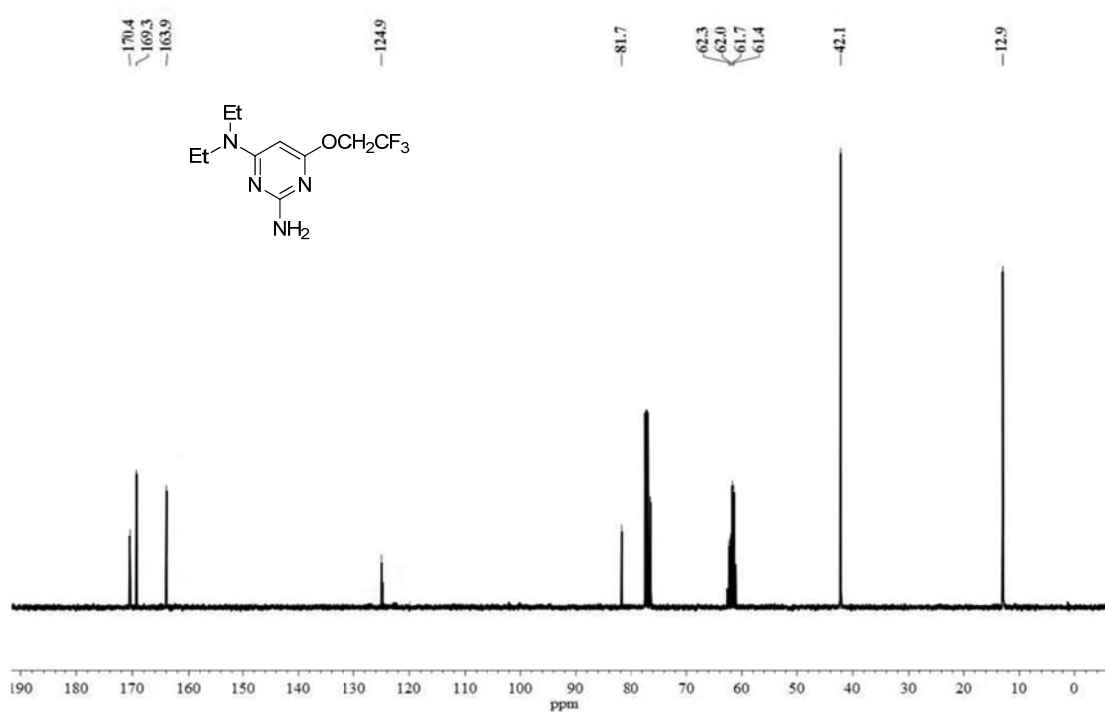

Figure S14 <sup>13</sup>C NMR spectra of compound Ik



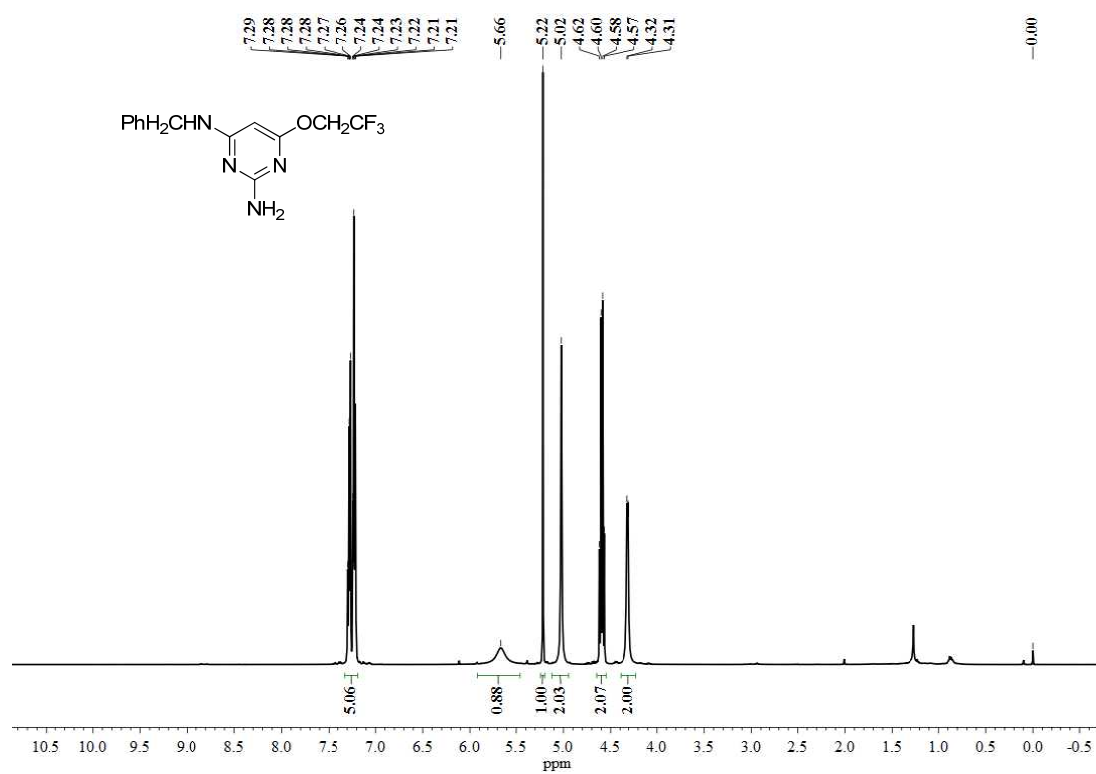

Figure S15 <sup>1</sup>H NMR spectra of compound II

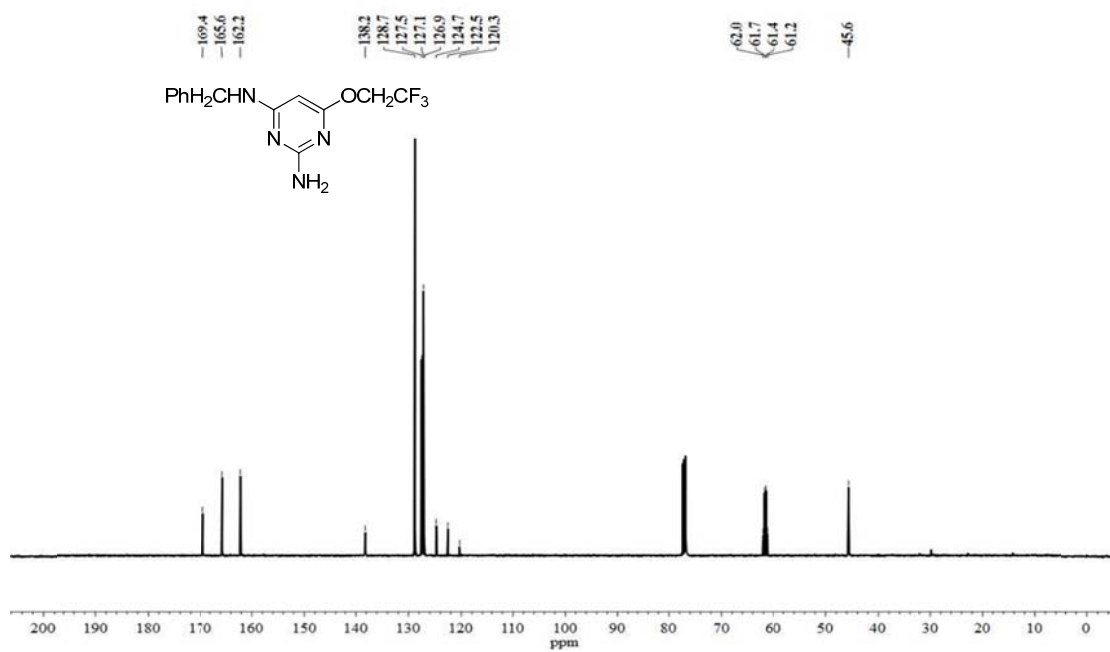

Figure S16 <sup>13</sup>C NMR spectra of compound II

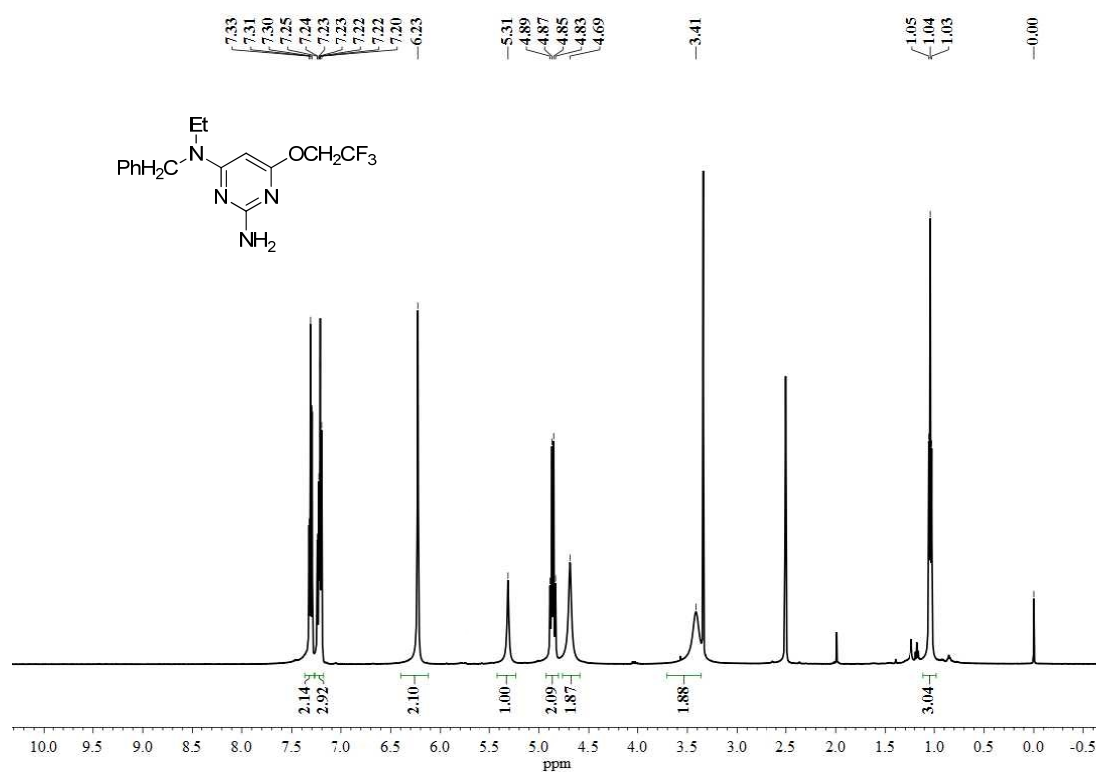

Figure S17 <sup>1</sup>H NMR spectra of compound Im

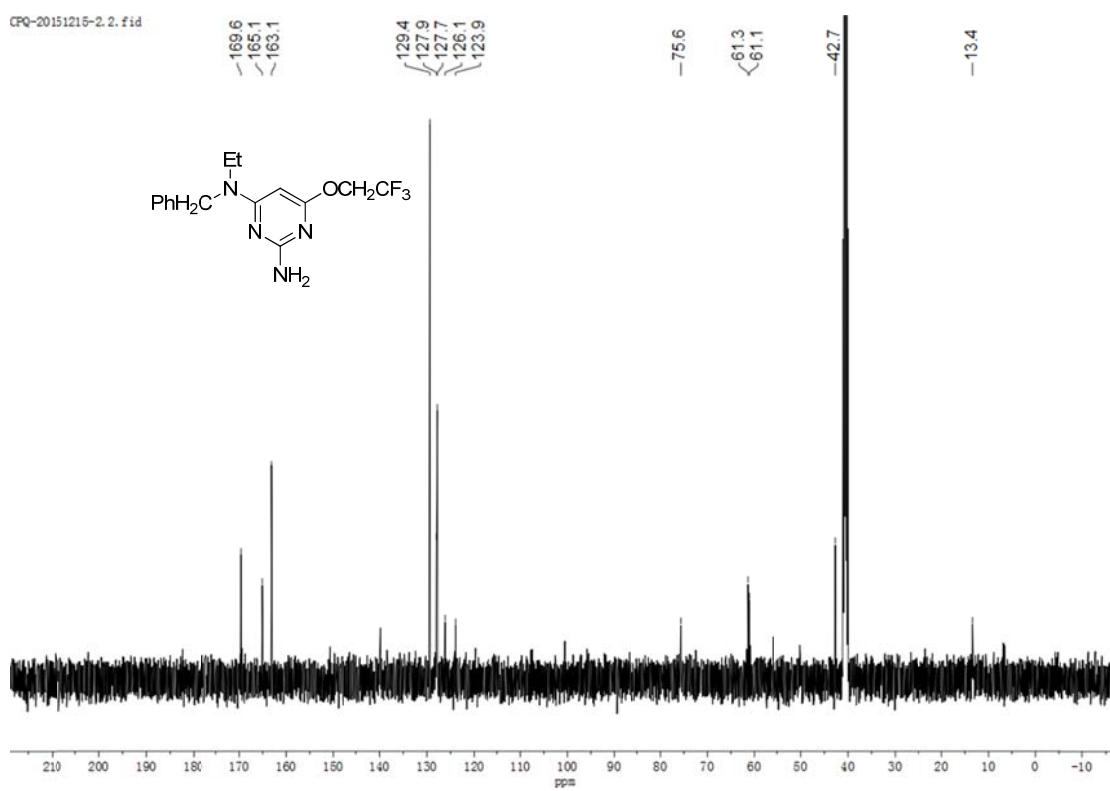

Figure S18 <sup>13</sup>C NMR spectra of compound Im

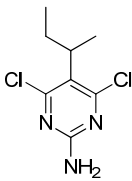

Figure S19  $^1\text{H}$  NMR spectra of compound In

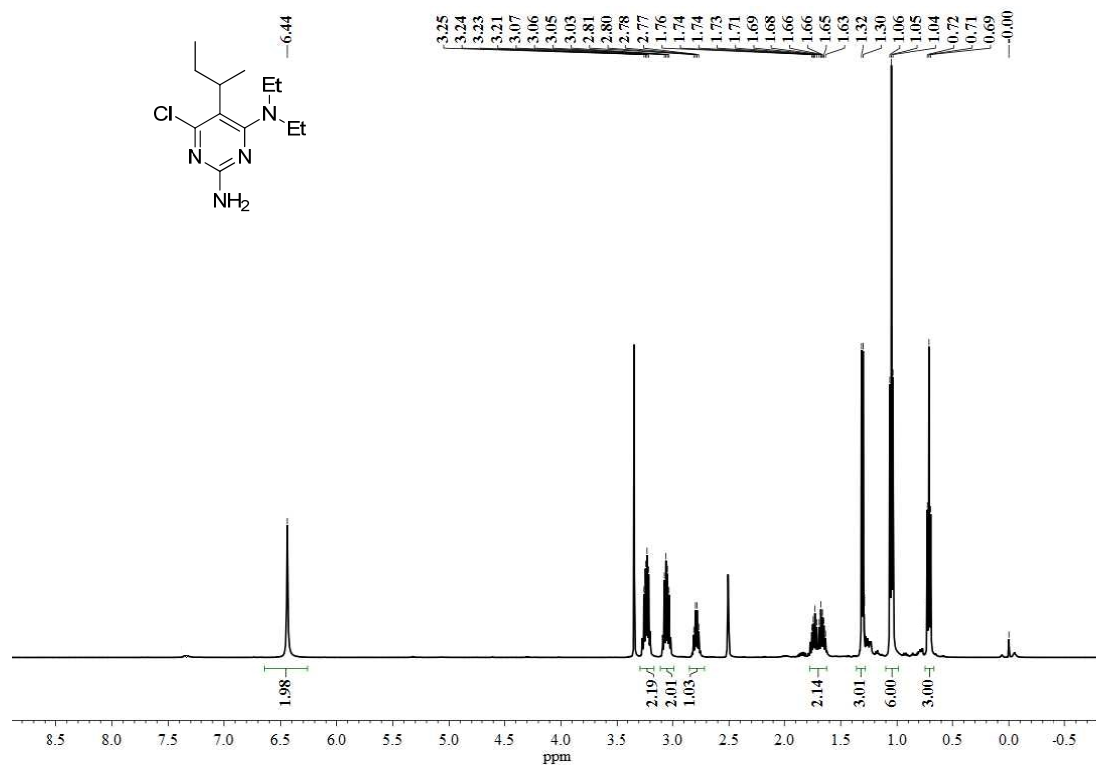

Figure S20 <sup>1</sup>H NMR spectra of compound Io

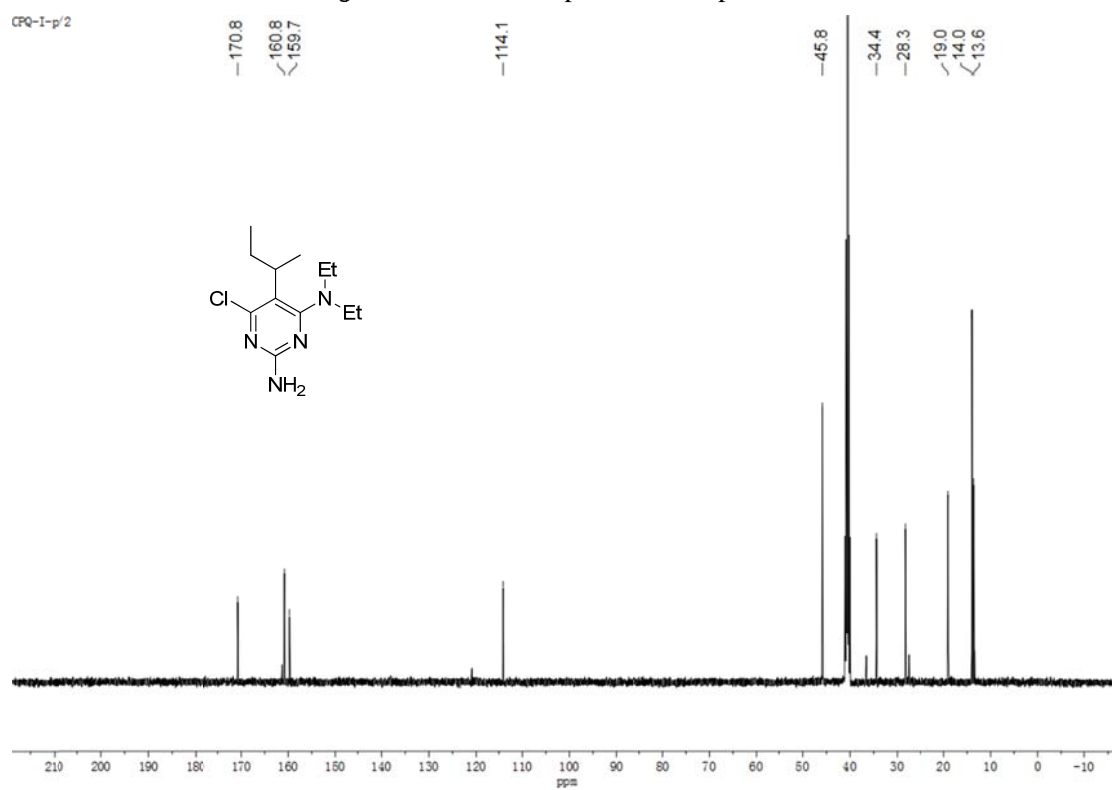

Figure S21 <sup>13</sup>C NMR spectra of compound Io

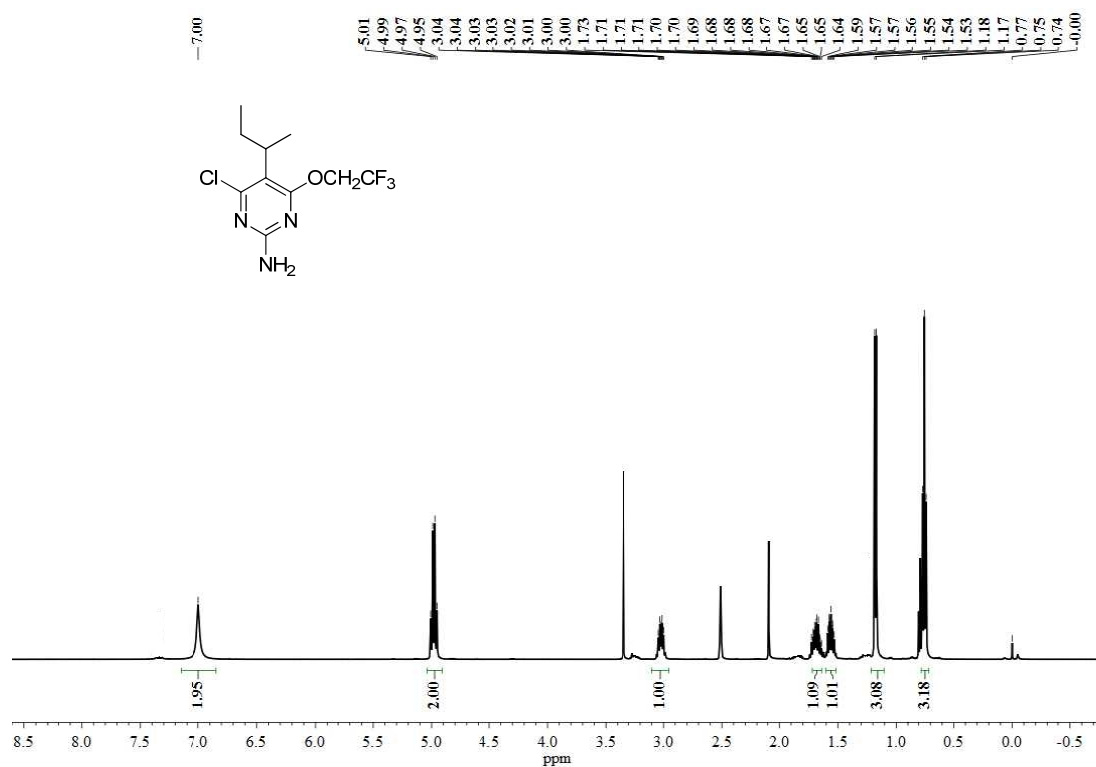

Figure S22 <sup>1</sup>H NMR spectra of compound 1p

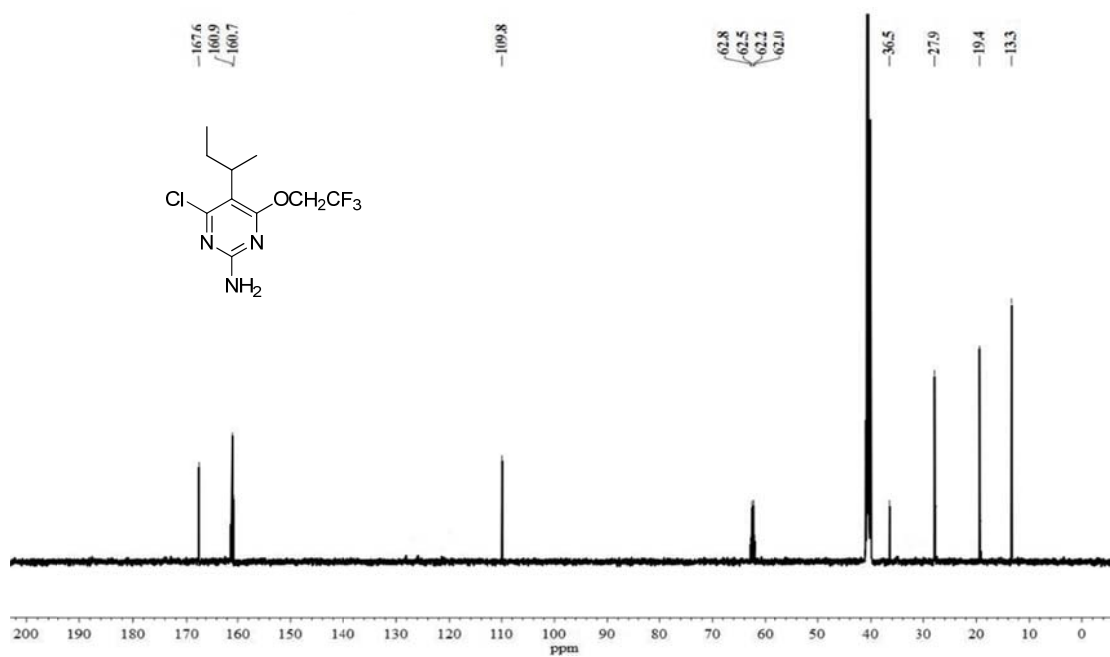

Figure S23 <sup>13</sup>C NMR spectra of compound 1p

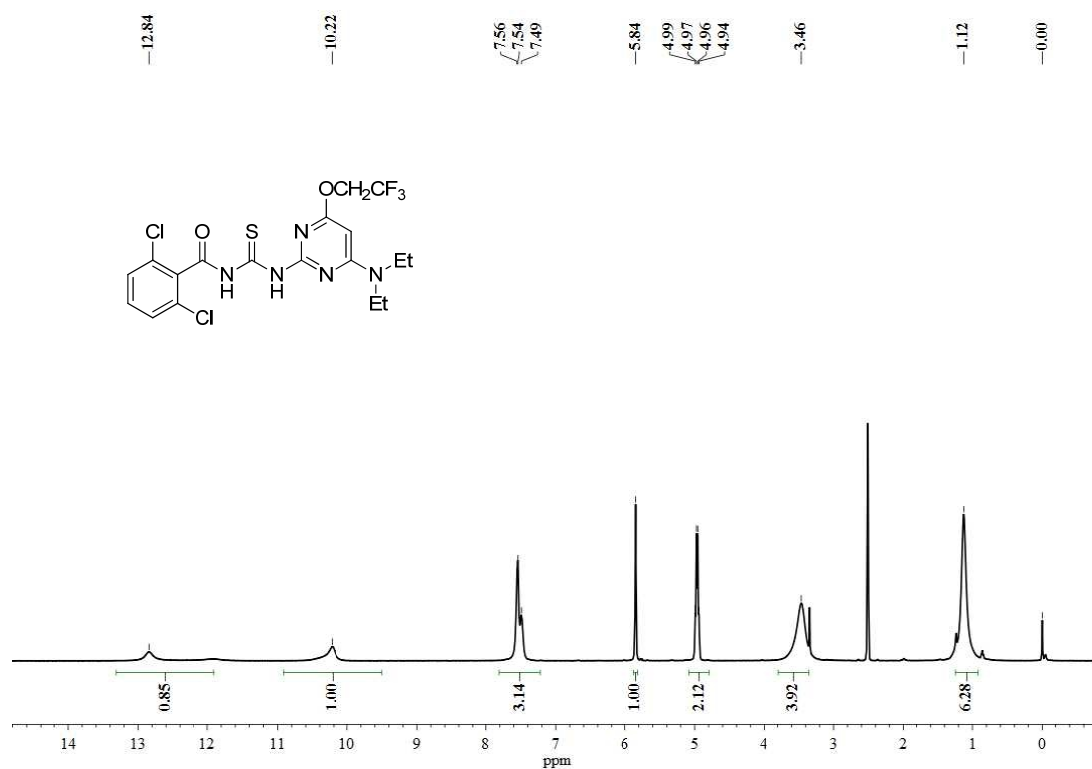

Figure S24 <sup>1</sup>H NMR spectra of compound 32a

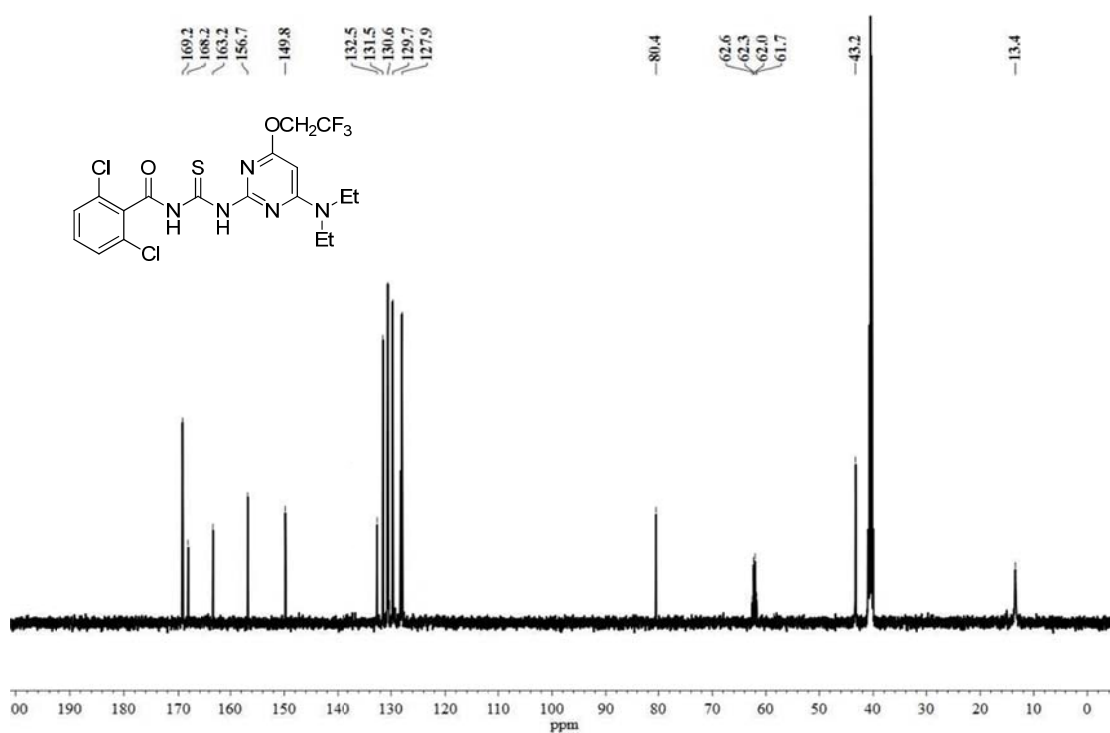

Figure S25 <sup>13</sup>C NMR spectra of compound 32a

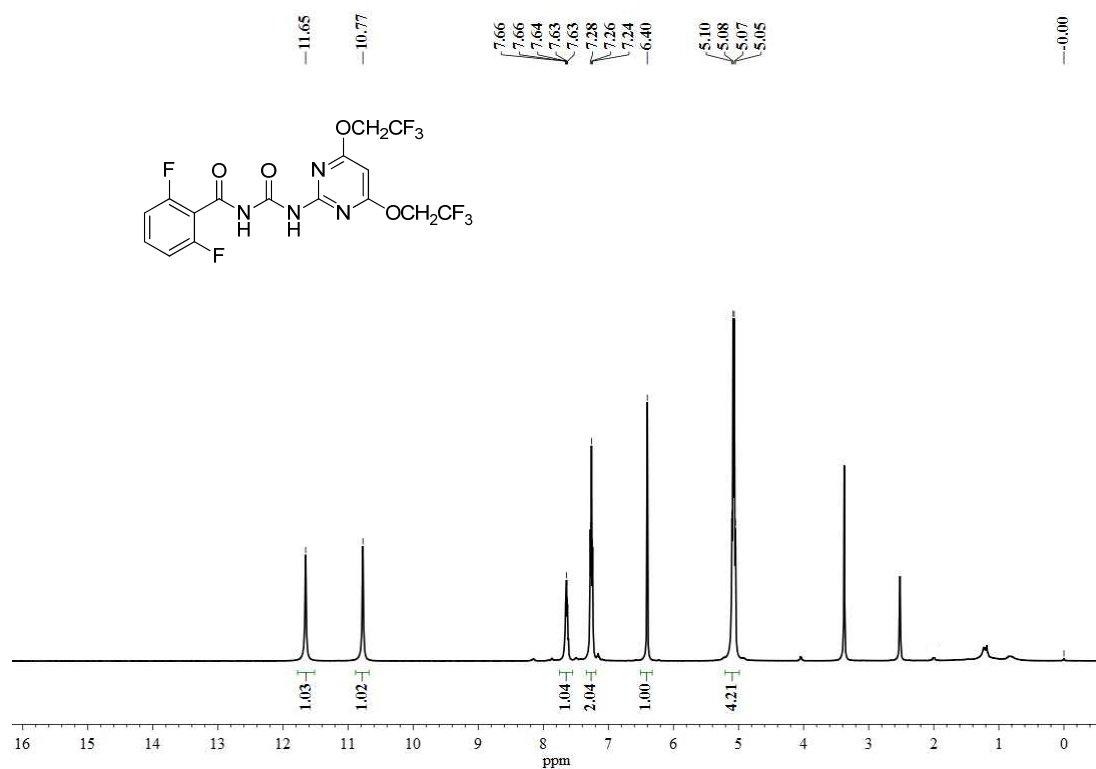

Figure S26 <sup>1</sup>H NMR spectra of compound 1

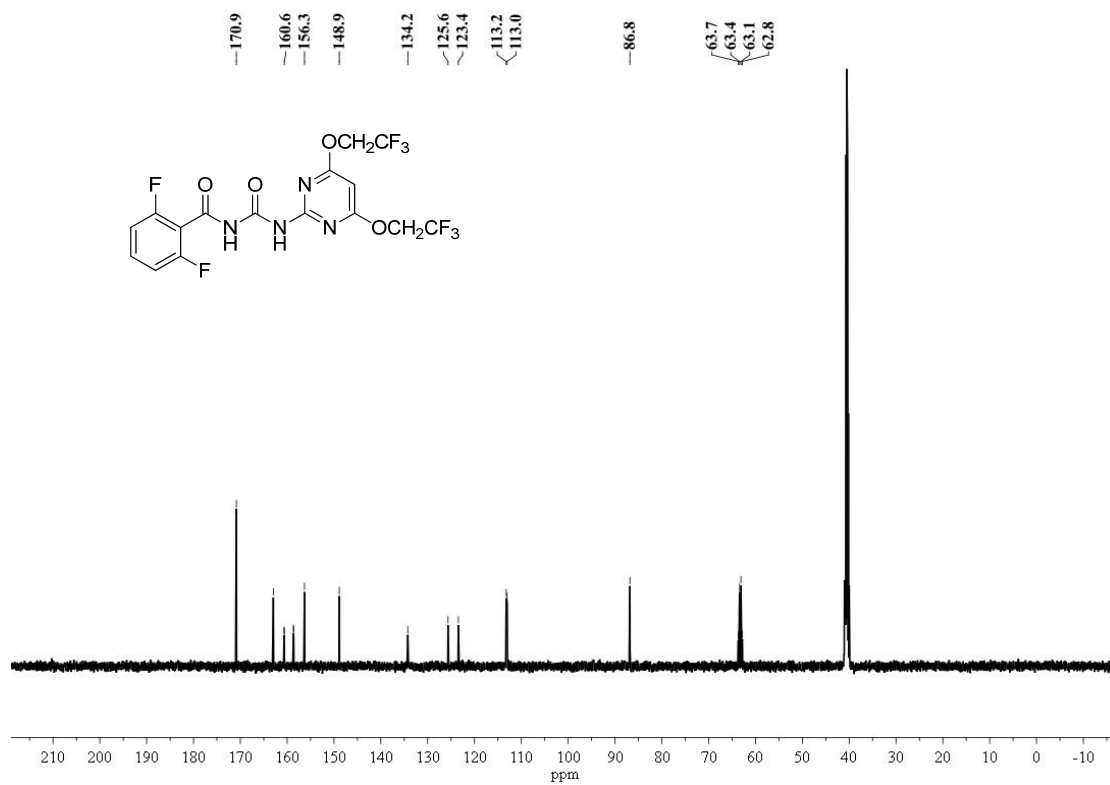

Figure S27 <sup>13</sup>C NMR spectra of compound 1

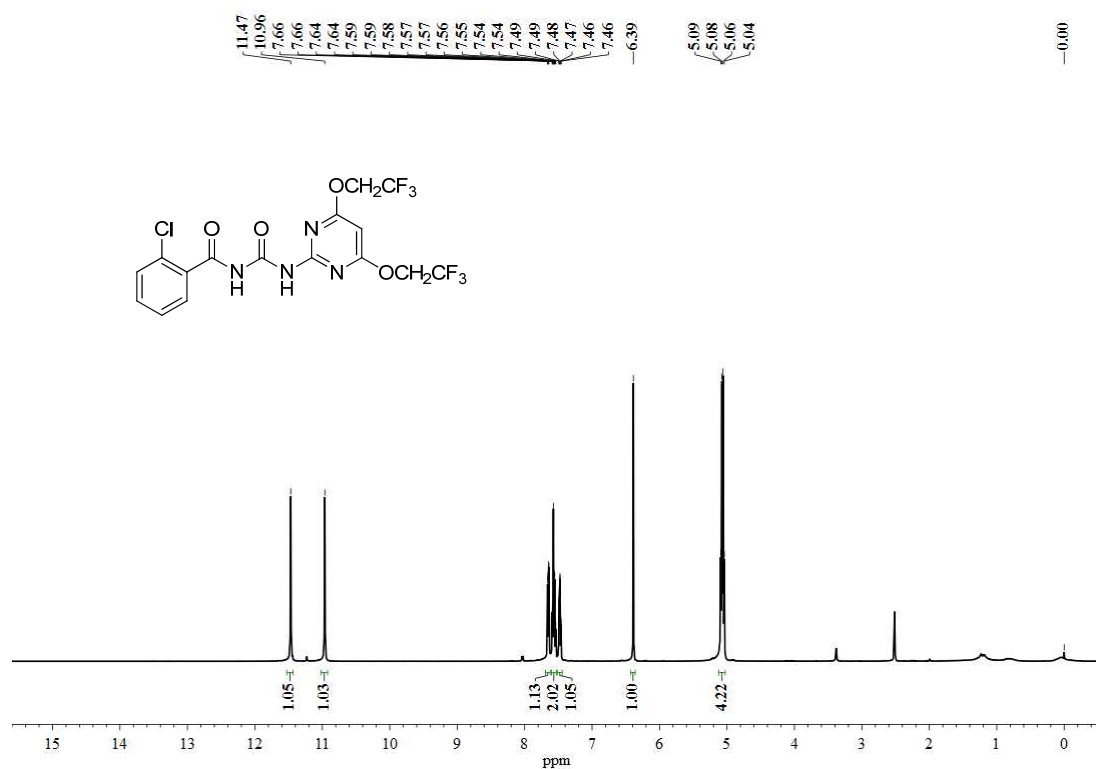

Figure S28 <sup>1</sup>H NMR spectra of compound 2

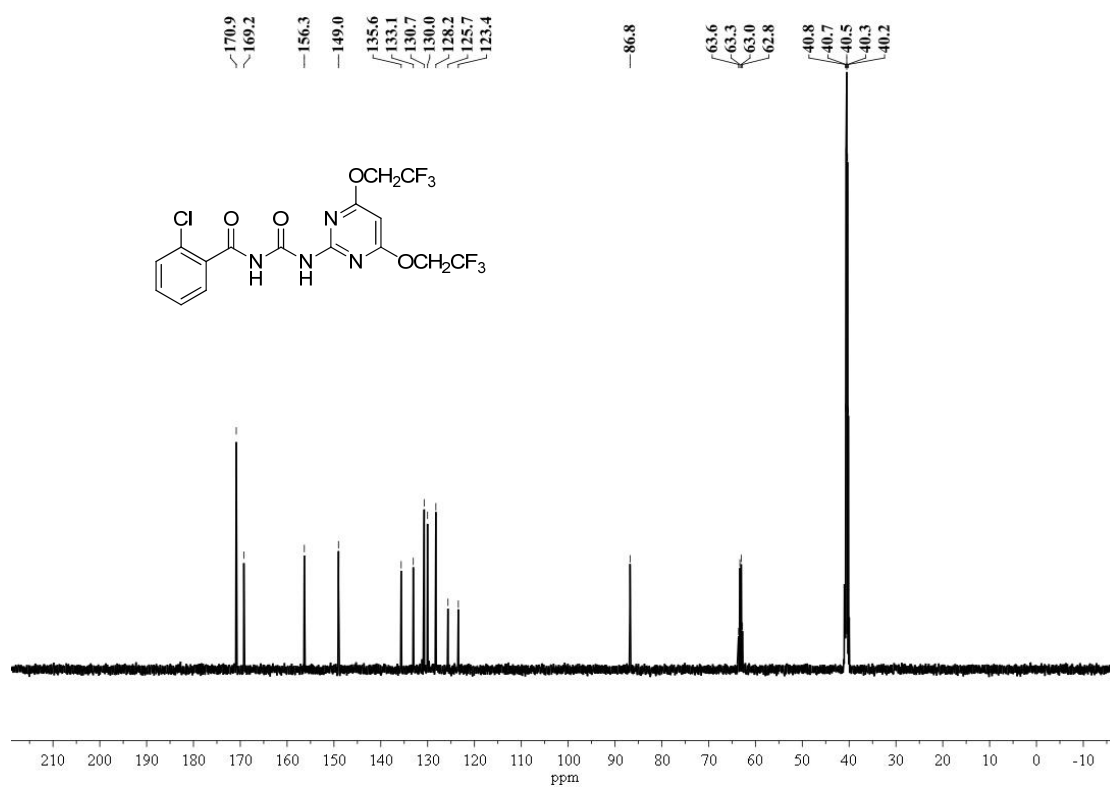

Figure S29 <sup>13</sup>C NMR spectra of compound 2



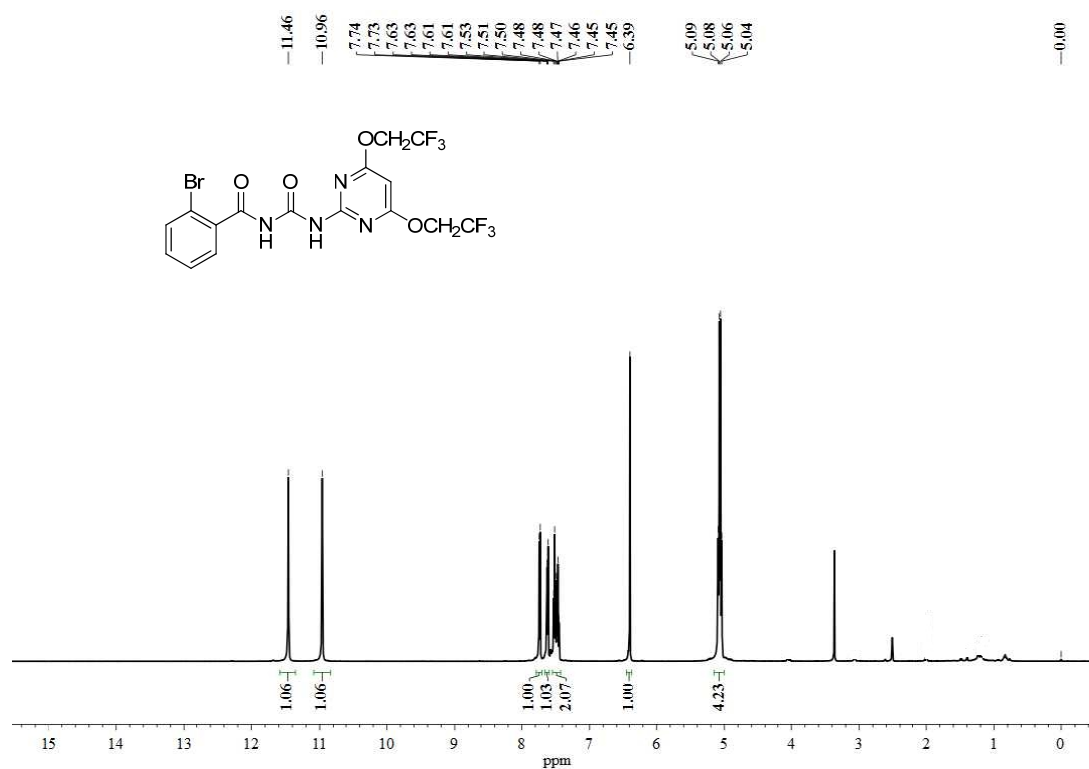

Figure S30 <sup>1</sup>H NMR spectra of compound 3

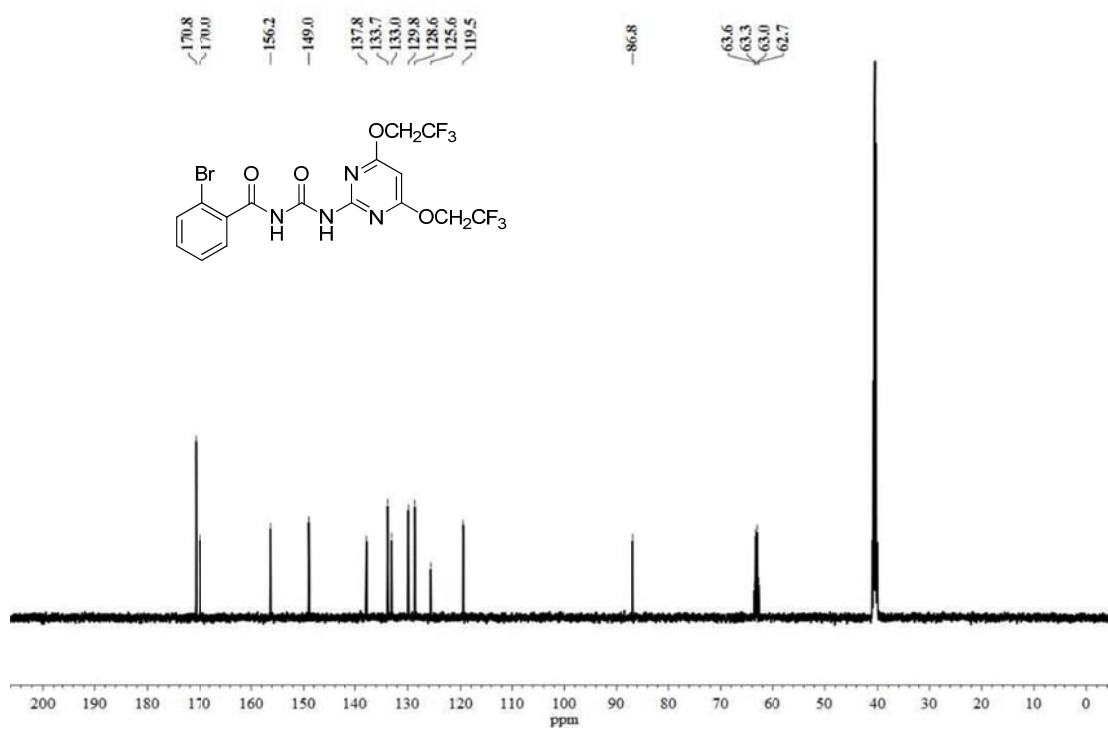

Figure S31 <sup>13</sup>C NMR spectra of compound 3

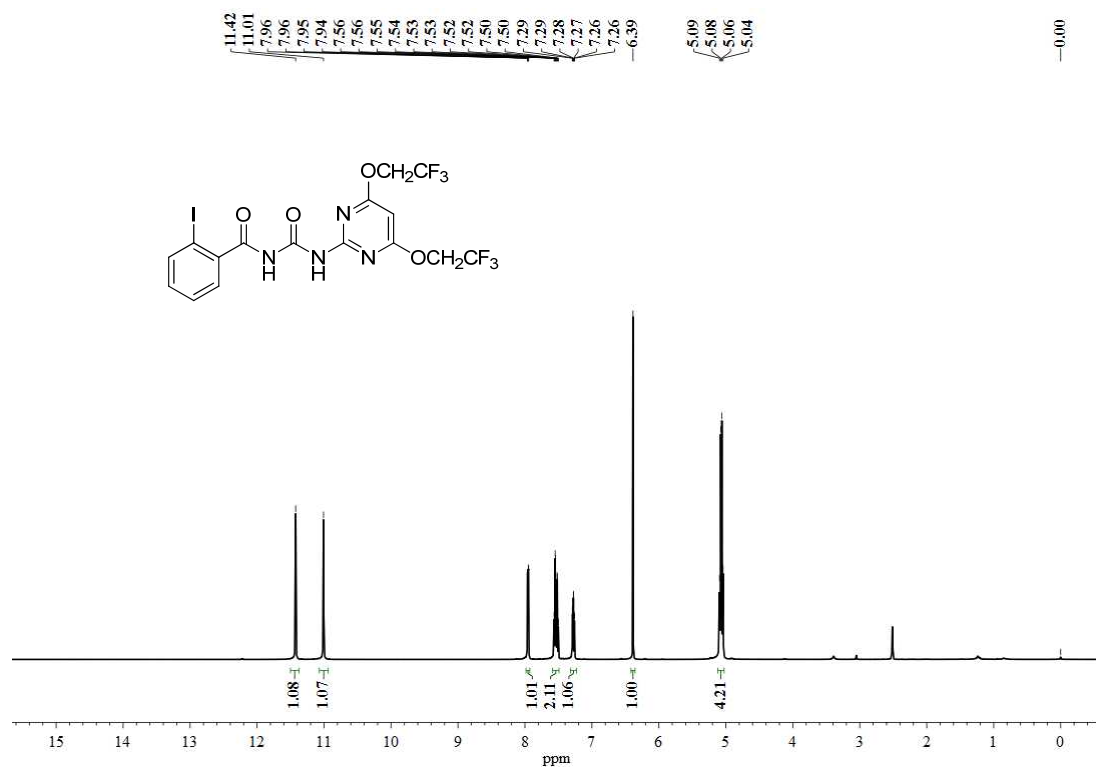

Figure S32 <sup>1</sup>H NMR spectra of compound 4

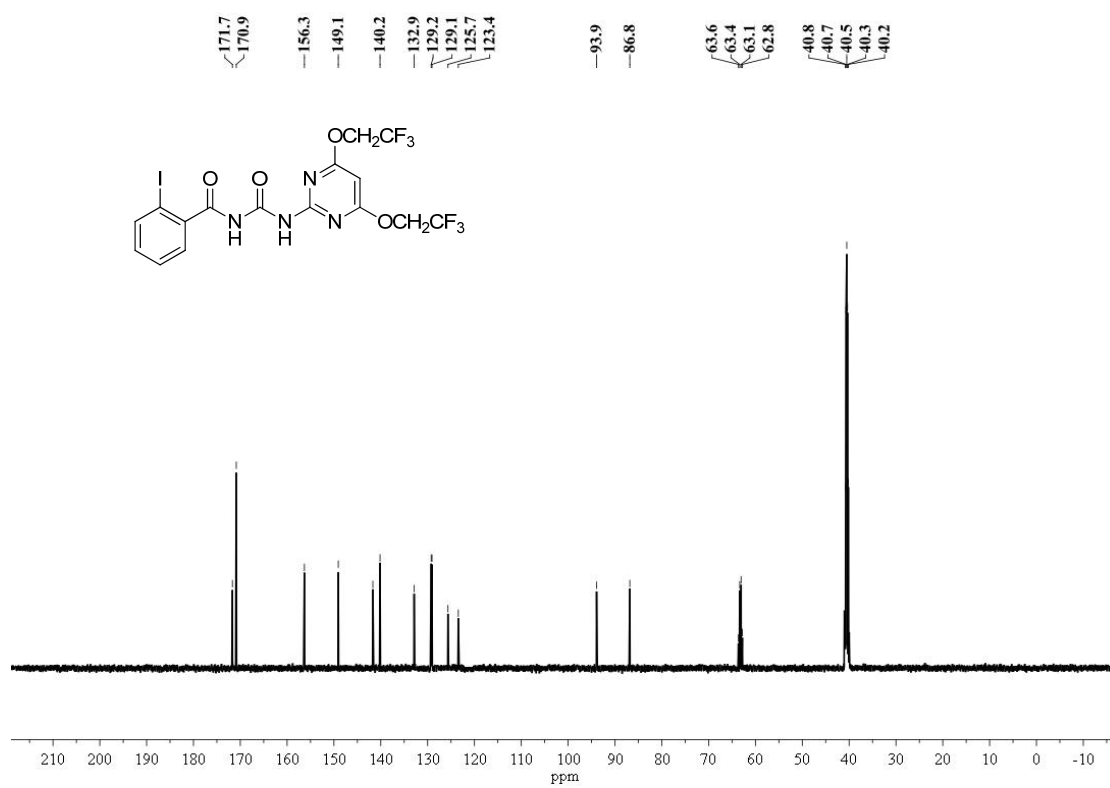

Figure S33 <sup>13</sup>C NMR spectra of compound 4

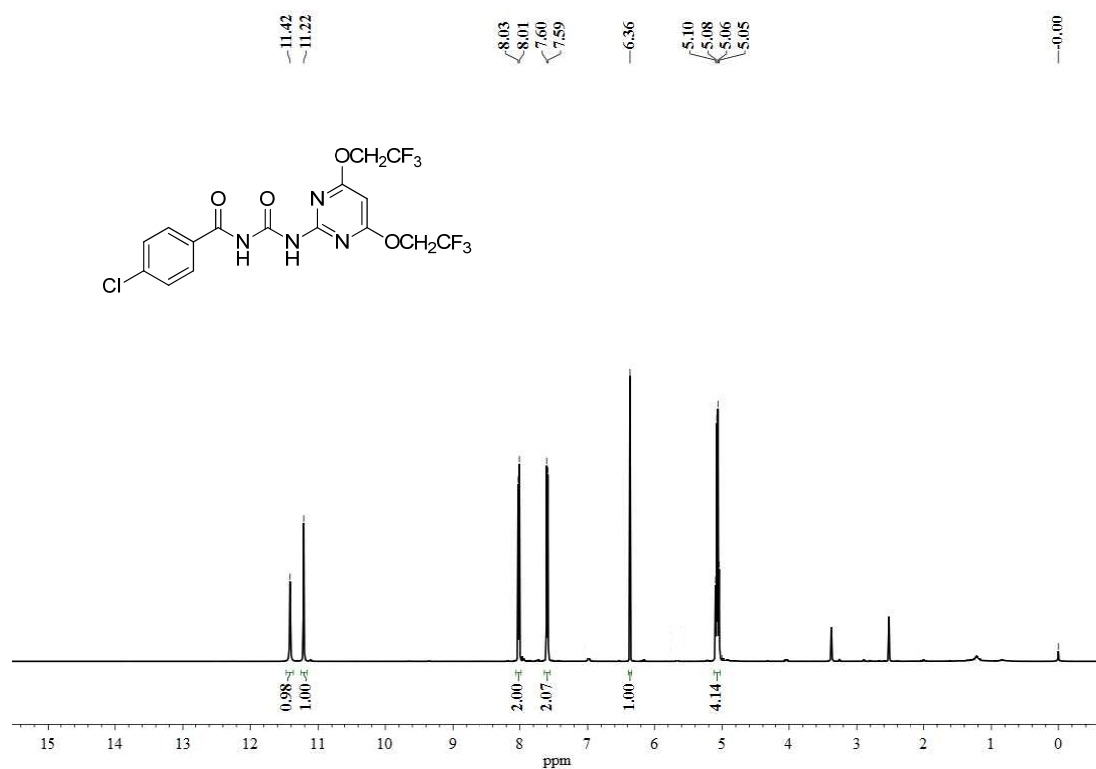

Figure S34 <sup>1</sup>H NMR spectra of compound 5

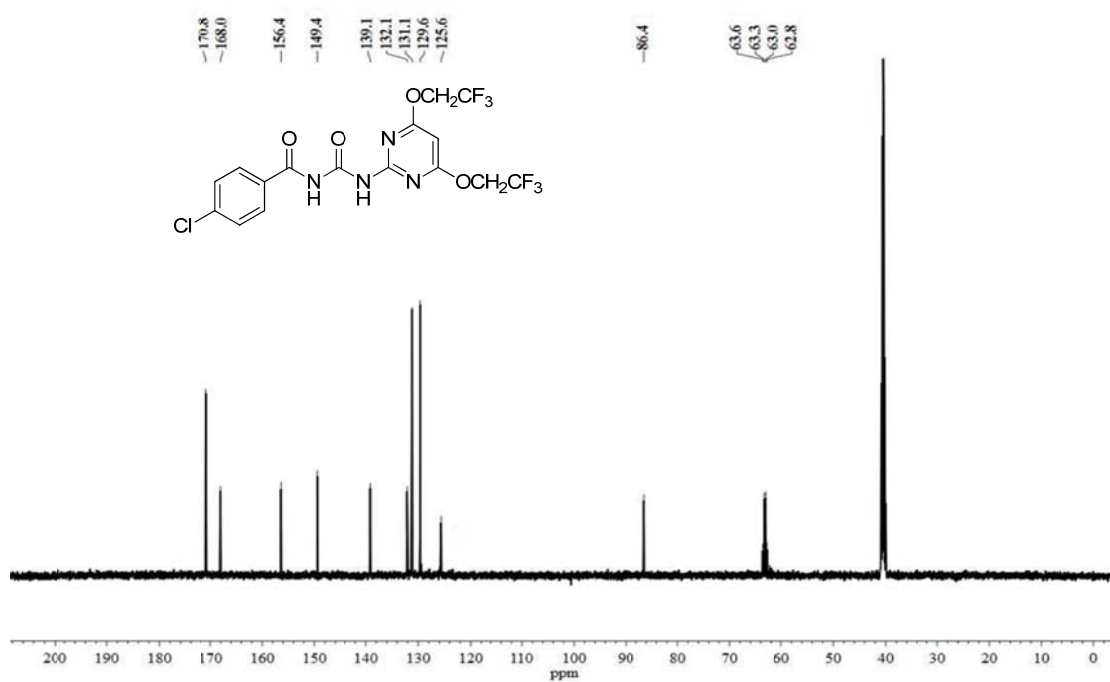

Figure S35 <sup>13</sup>C NMR spectra of compound 5

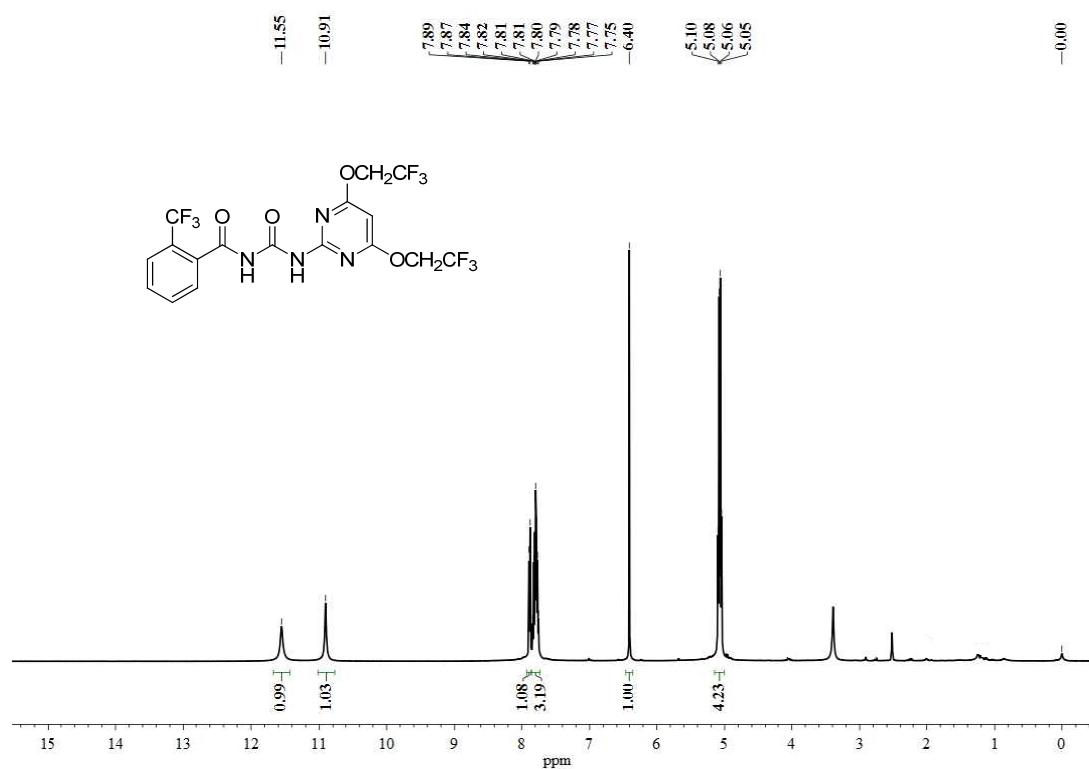

Figure S36 <sup>1</sup>H NMR spectra of compound 6

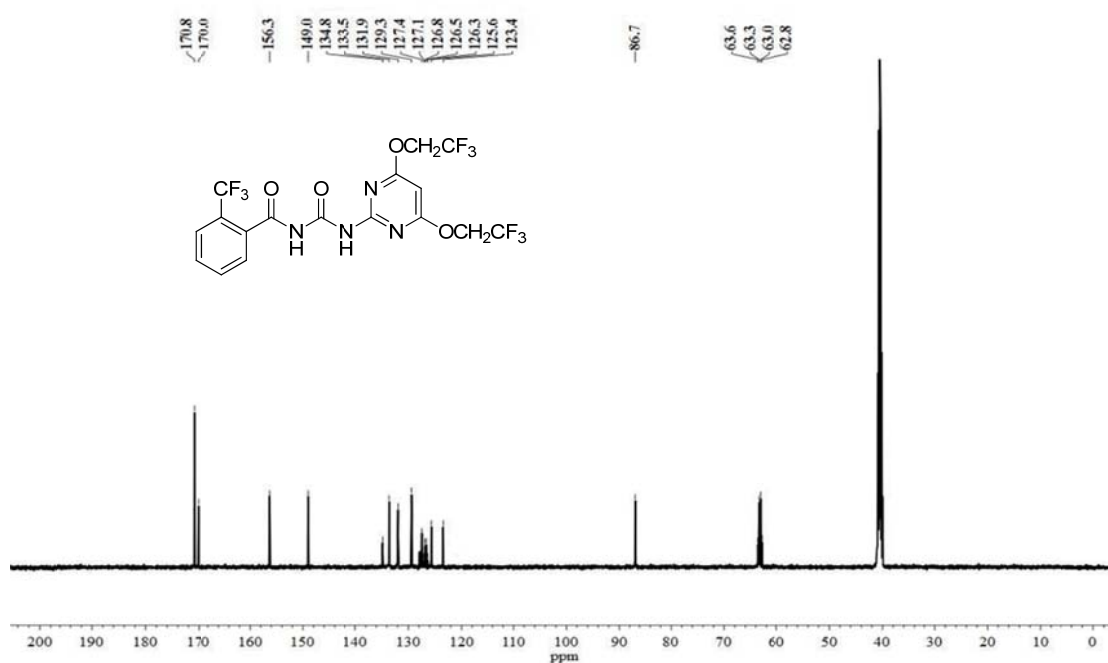

Figure S37 <sup>13</sup>C NMR spectra of compound 6

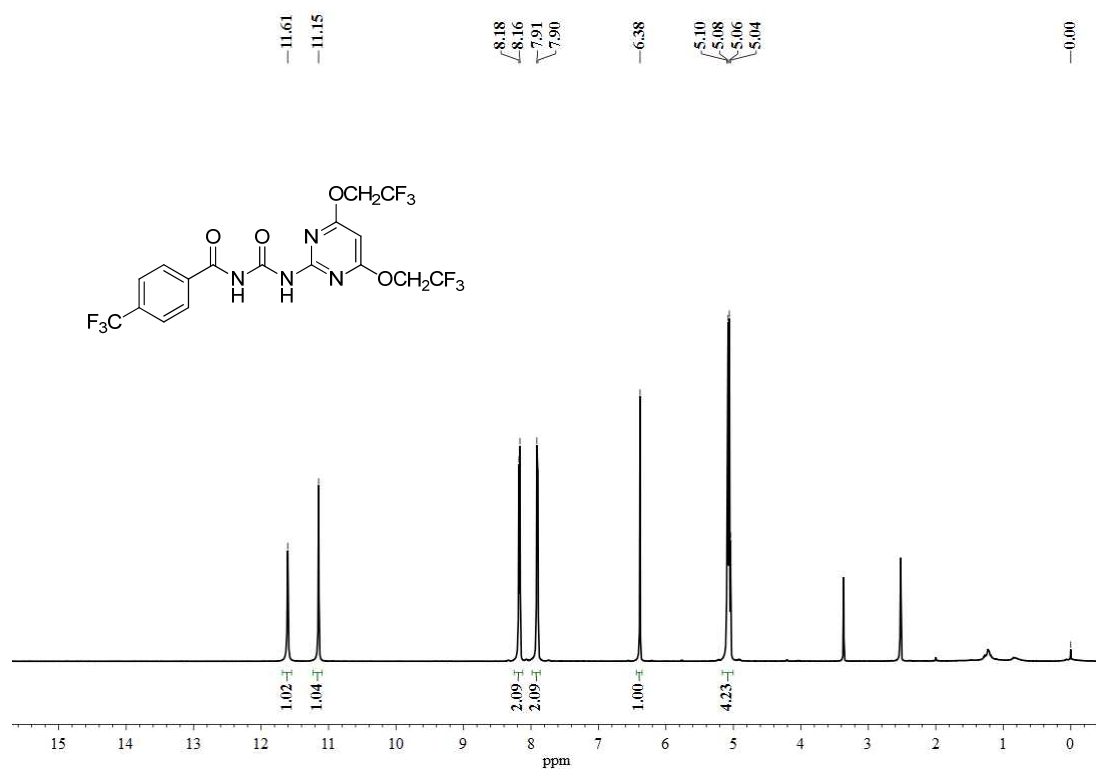

Figure S38 <sup>1</sup>H NMR spectra of compound 7

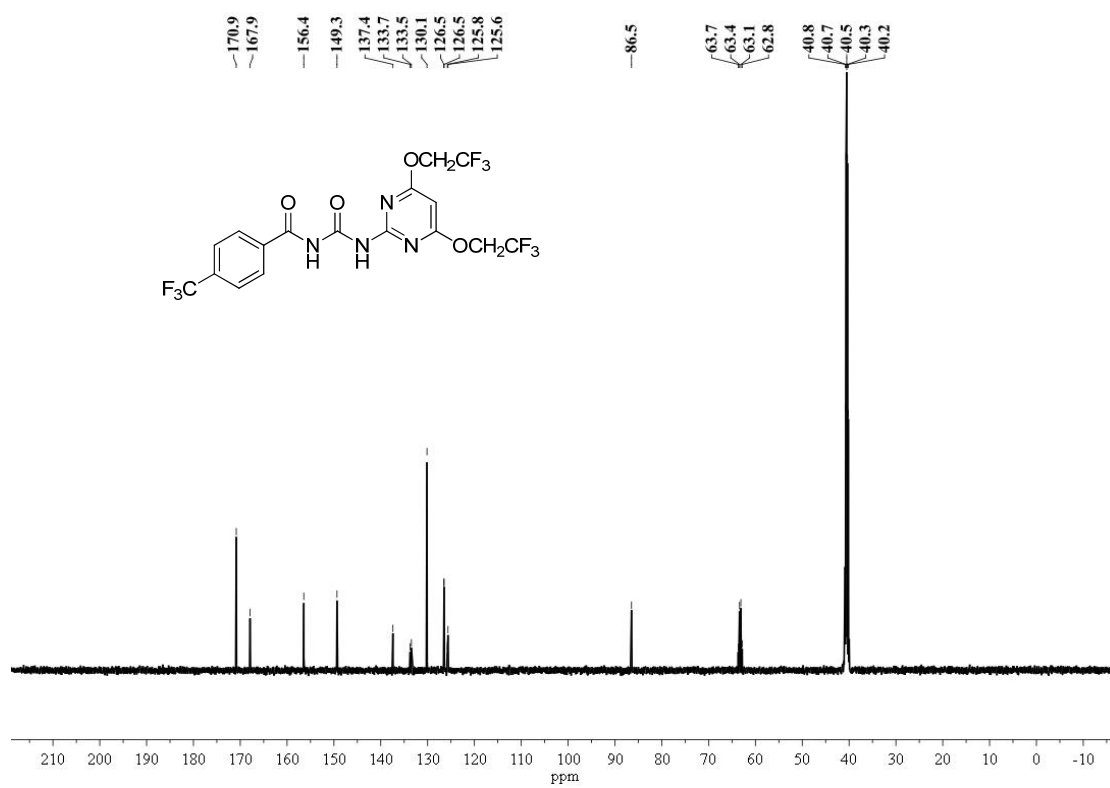

Figure S39 <sup>13</sup>C NMR spectra of compound 7

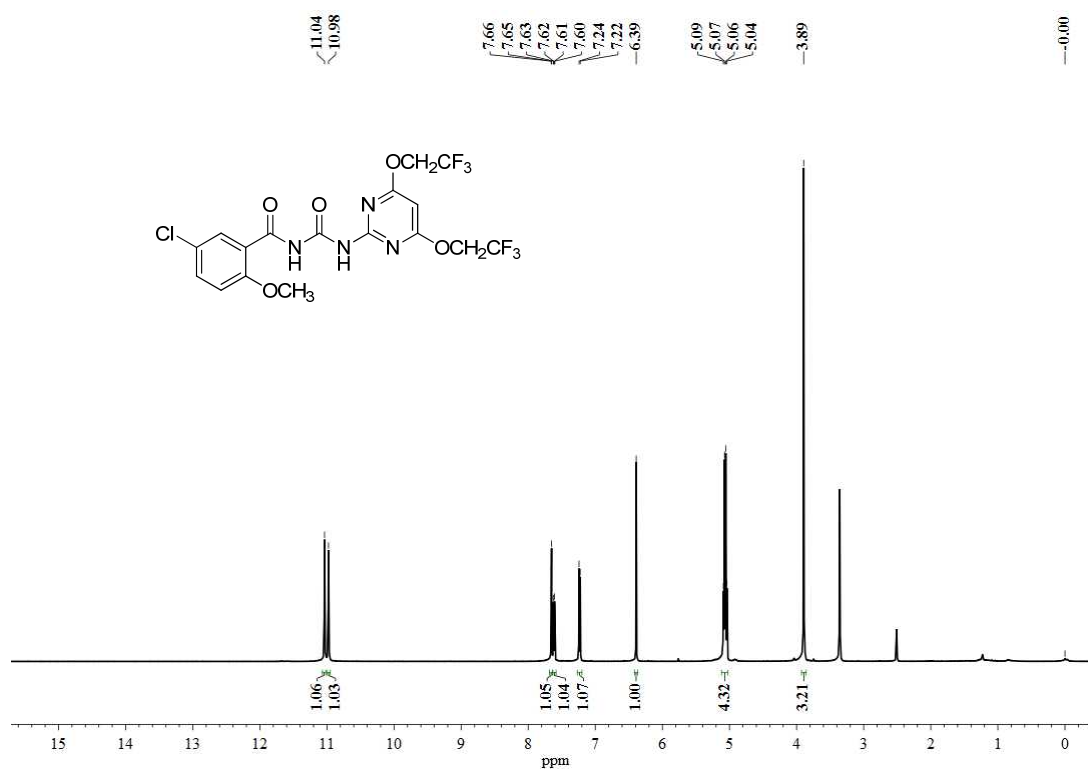

Figure S40 <sup>1</sup>H NMR spectra of compound 8

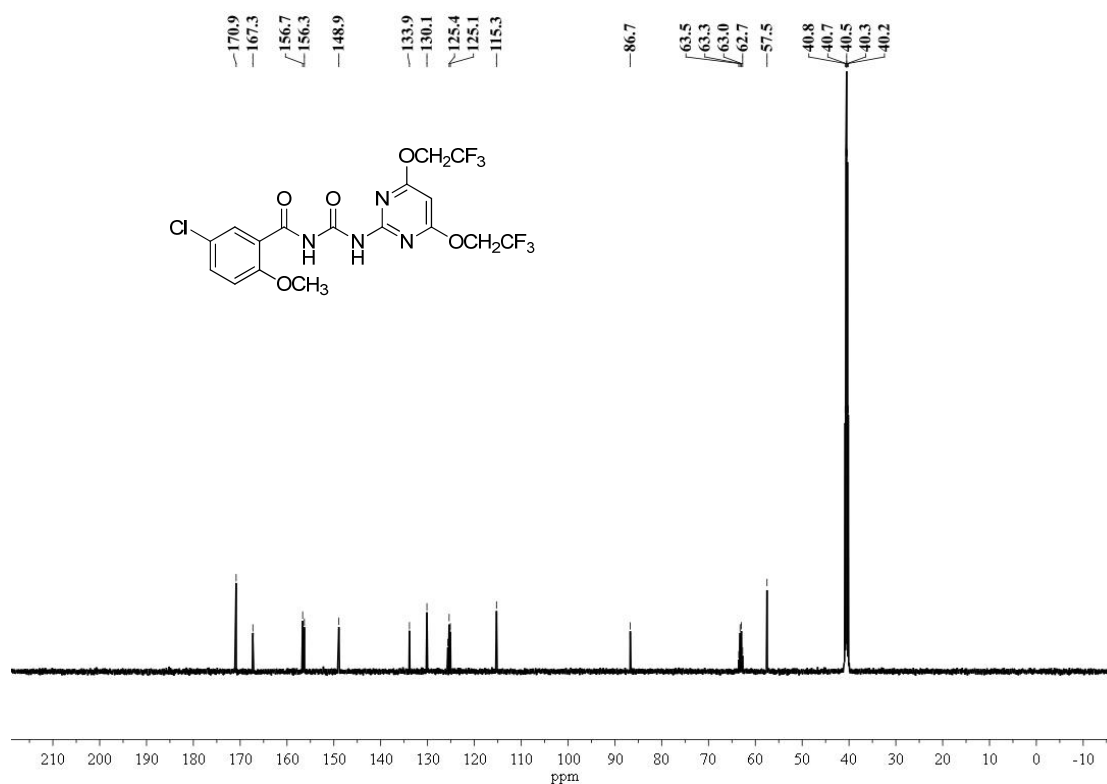

Figure S41 <sup>13</sup>C NMR spectra of compound 8

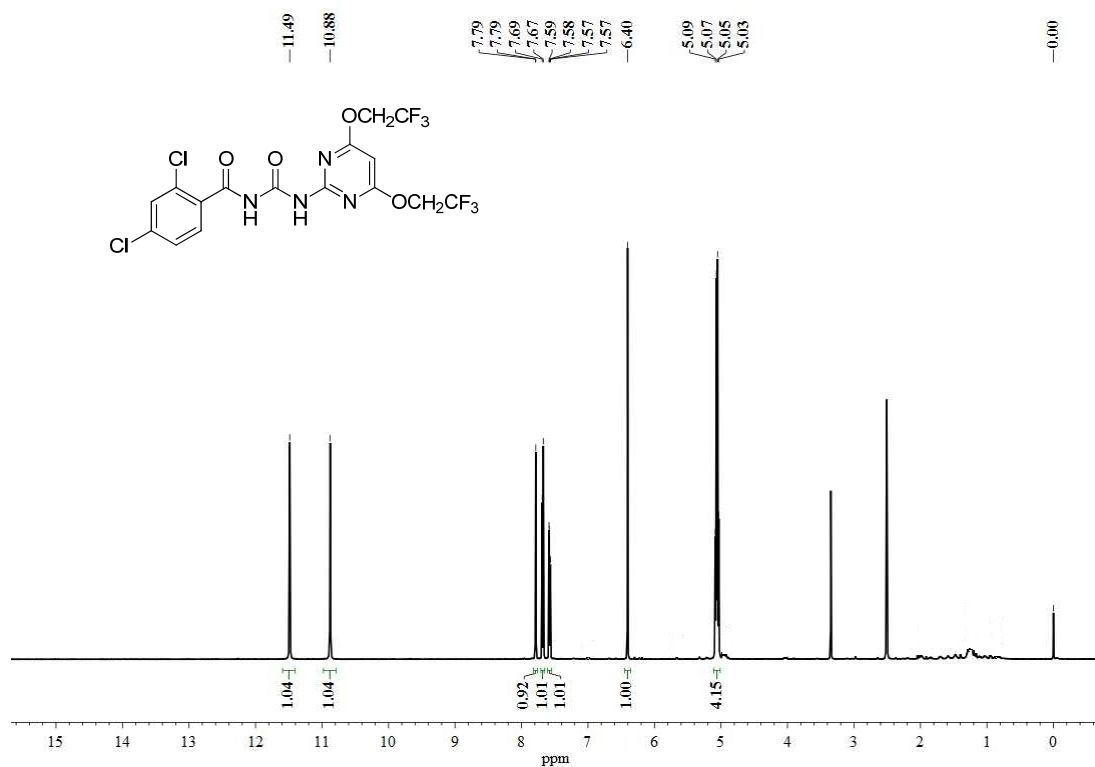

Figure S42 <sup>1</sup>H NMR spectra of compound 9

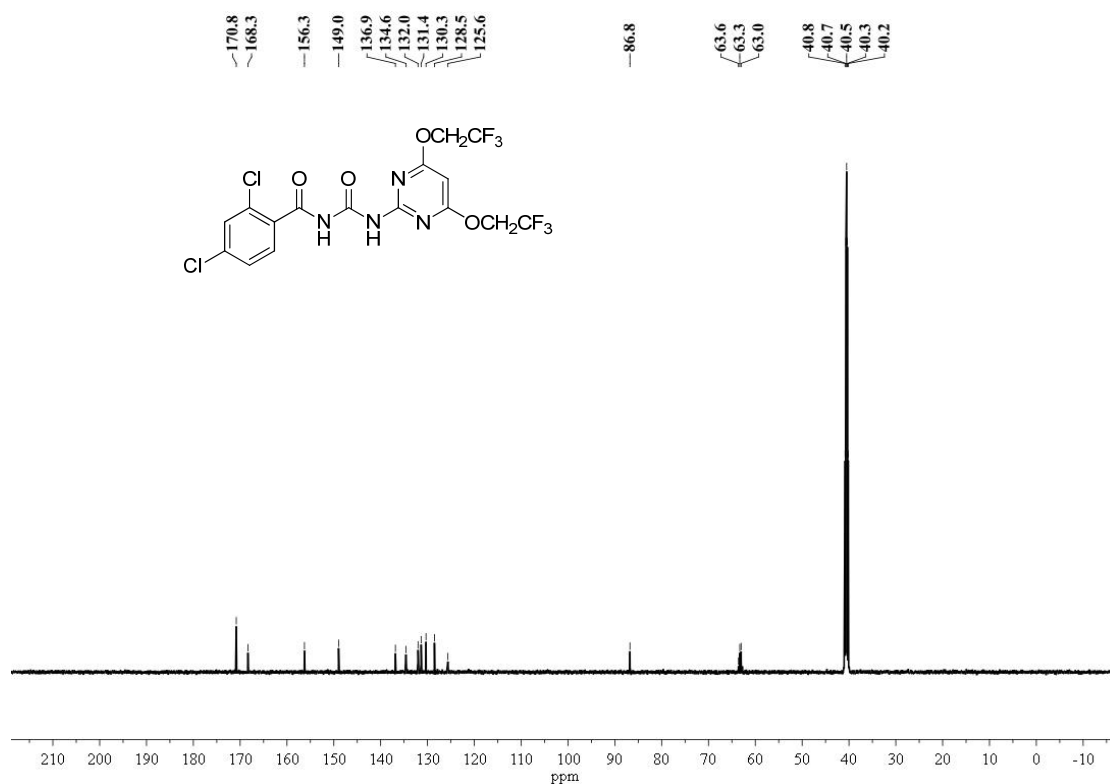

Figure S43 <sup>13</sup>C NMR spectra of compound 9

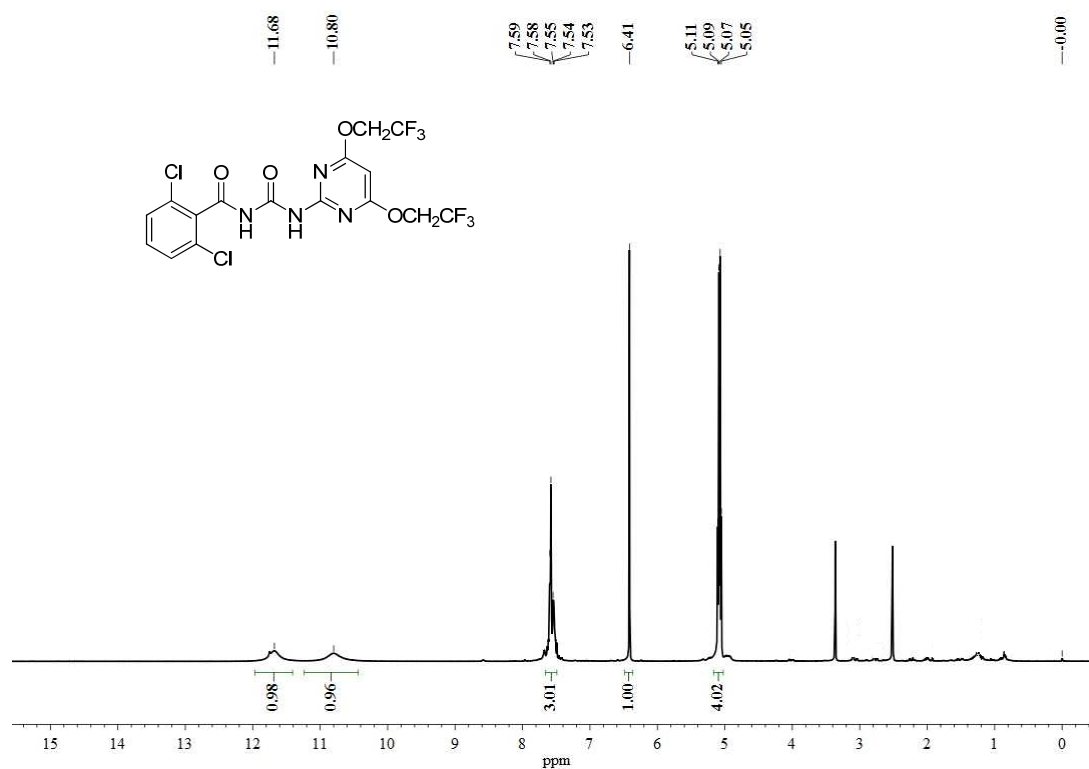

Figure S44 <sup>1</sup>H NMR spectra of compound 10

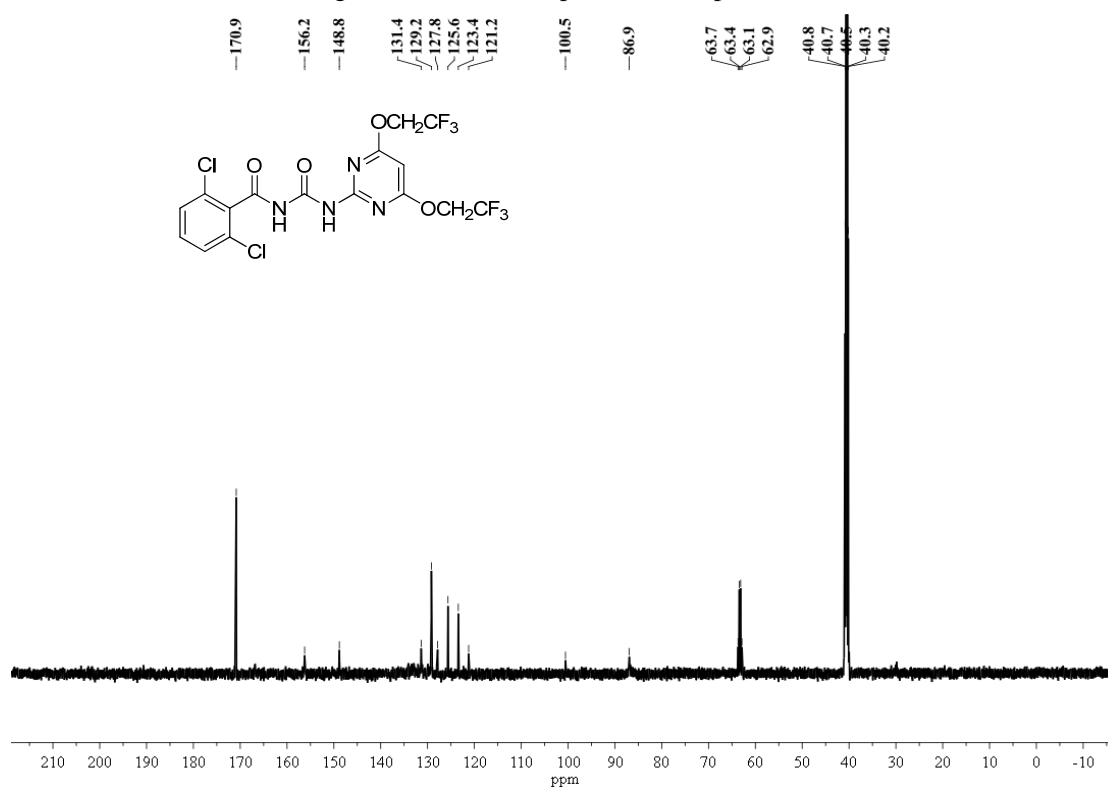

Figure S45 <sup>13</sup>C NMR spectra of compound 10



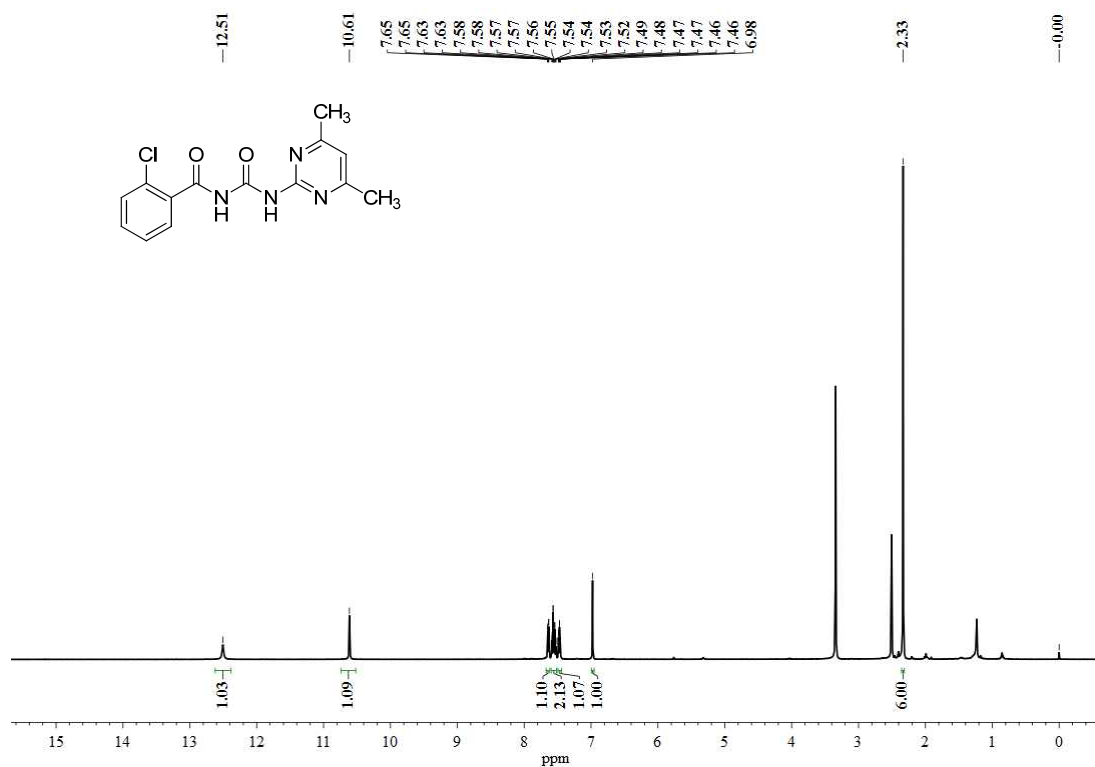

Figure S46 <sup>1</sup>H NMR spectra of compound 11

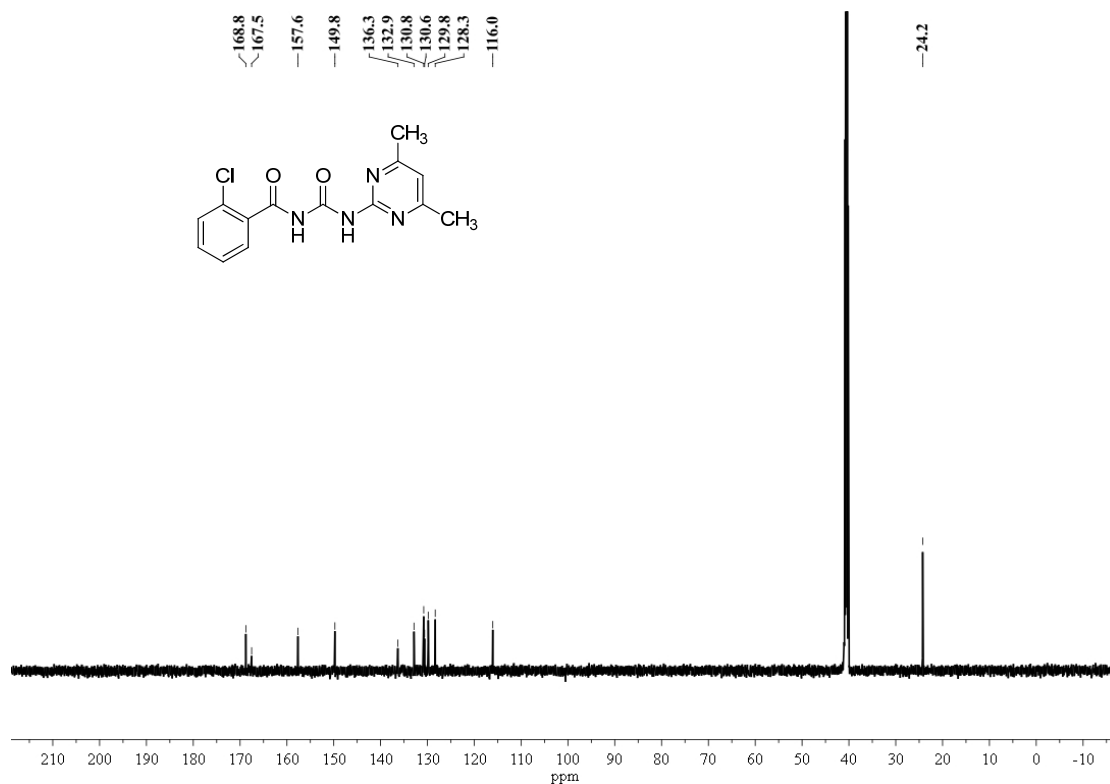

Figure S47 <sup>13</sup>C NMR spectra of compound 11

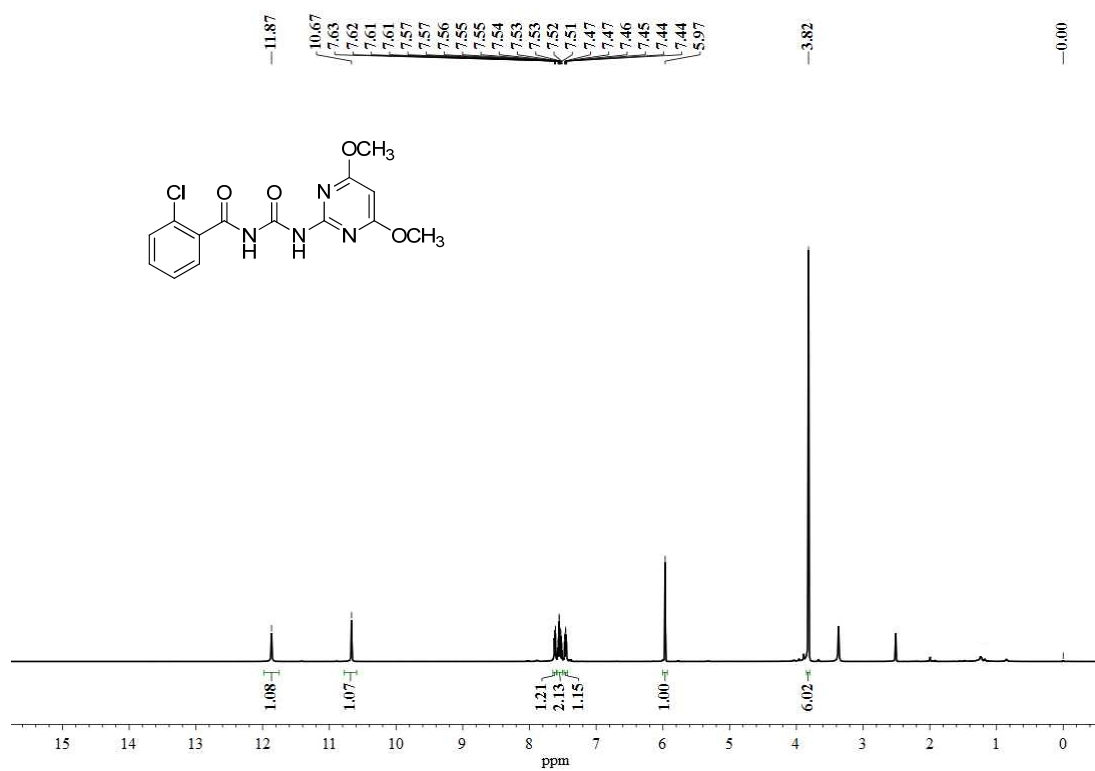

Figure S48 <sup>1</sup>H NMR spectra of compound 12

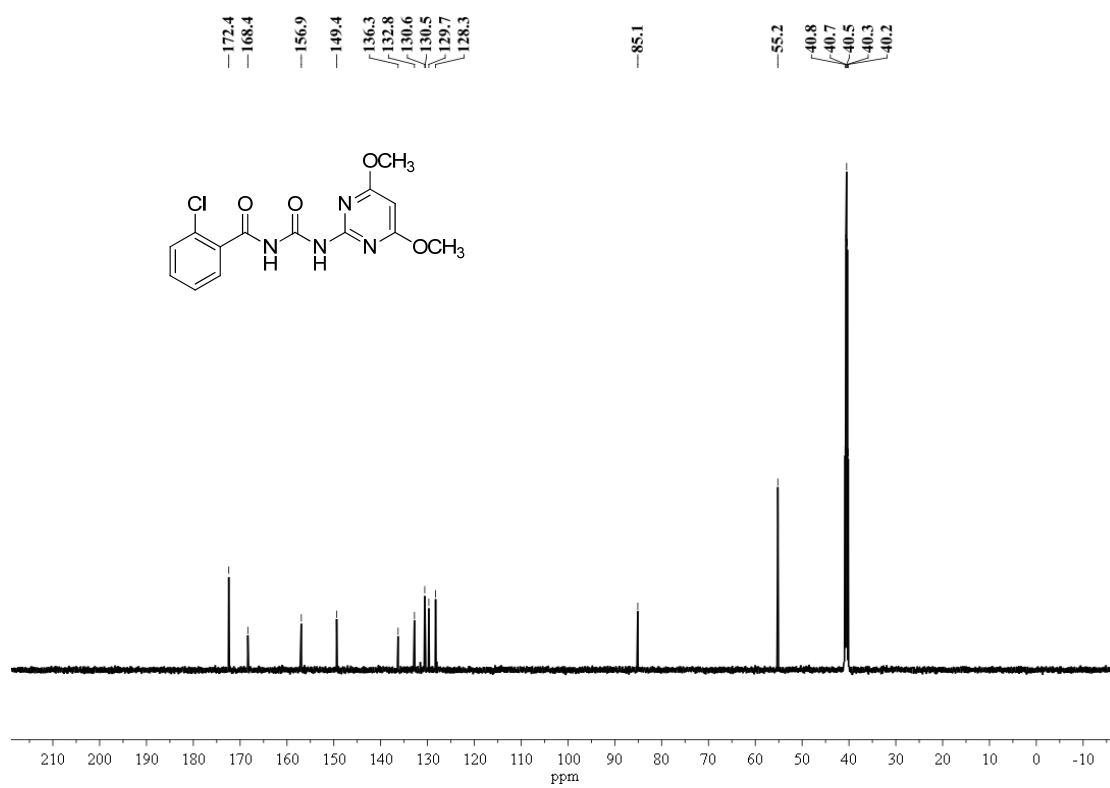

Figure S49 <sup>13</sup>C NMR spectra of compound 12

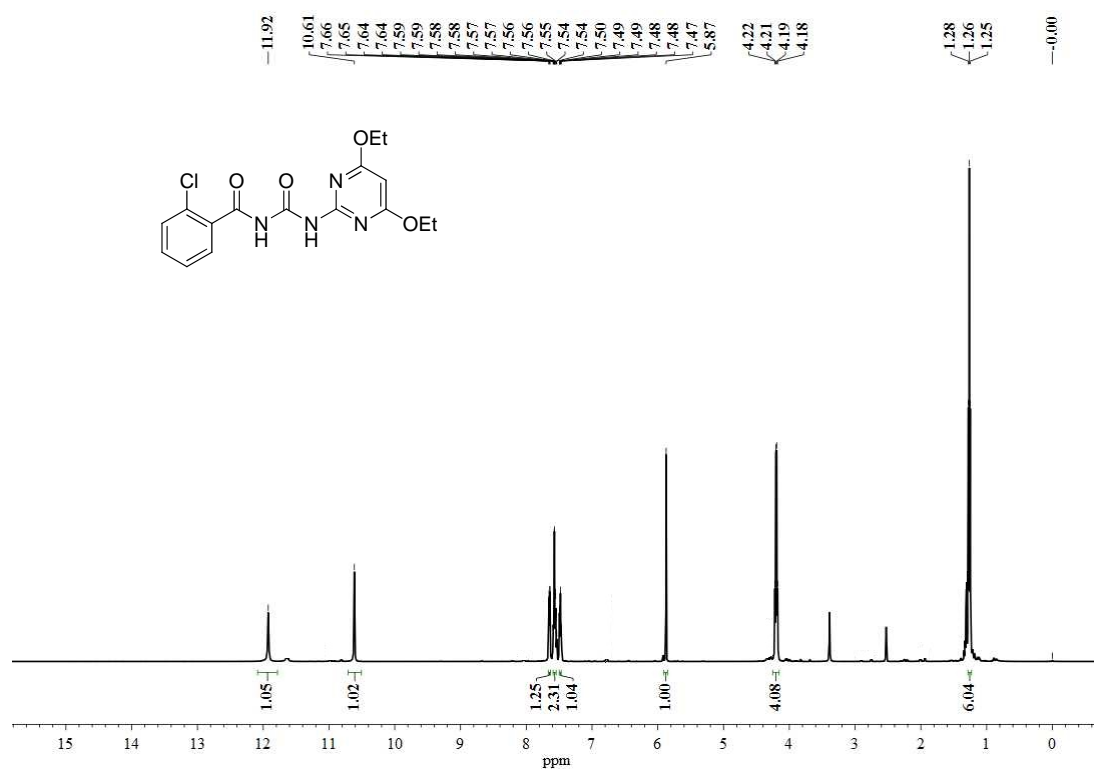

Figure S50 <sup>1</sup>H NMR spectra of compound 13

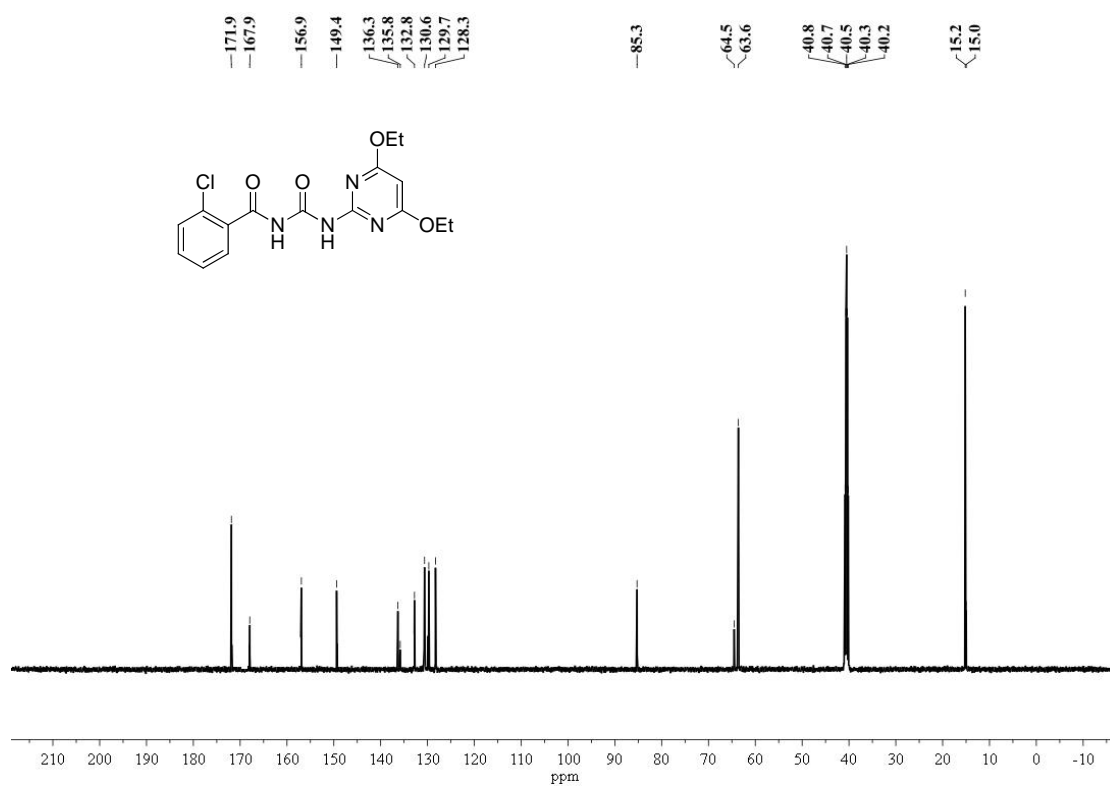

Figure S51 <sup>13</sup>C NMR spectra of compound 13

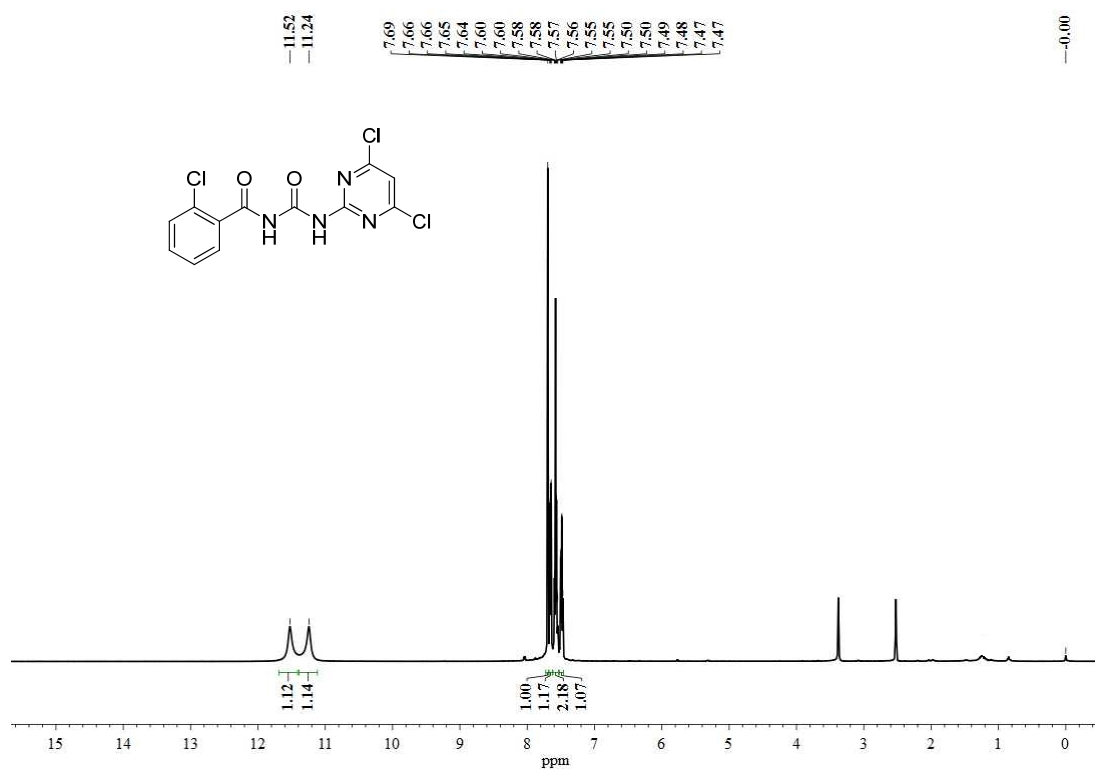

Figure S52 <sup>1</sup>H NMR spectra of compound 14

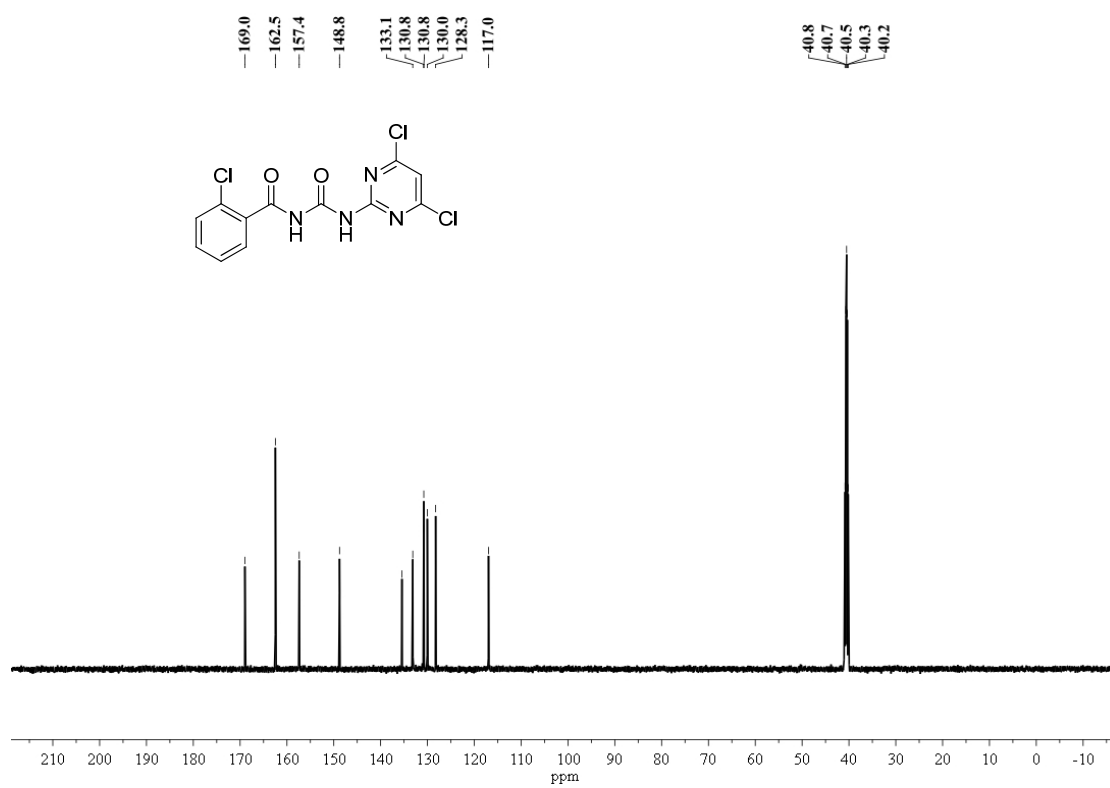

Figure S53 <sup>13</sup>C NMR spectra of compound 14

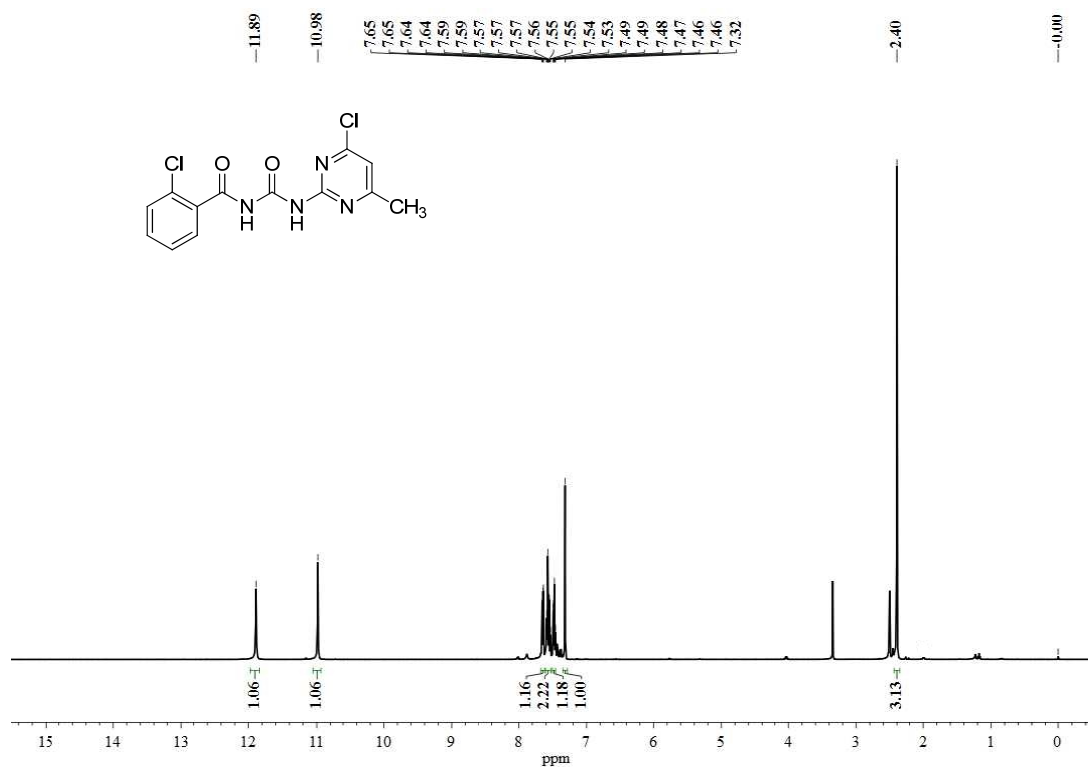

Figure S54 <sup>1</sup>H NMR spectra of compound 15

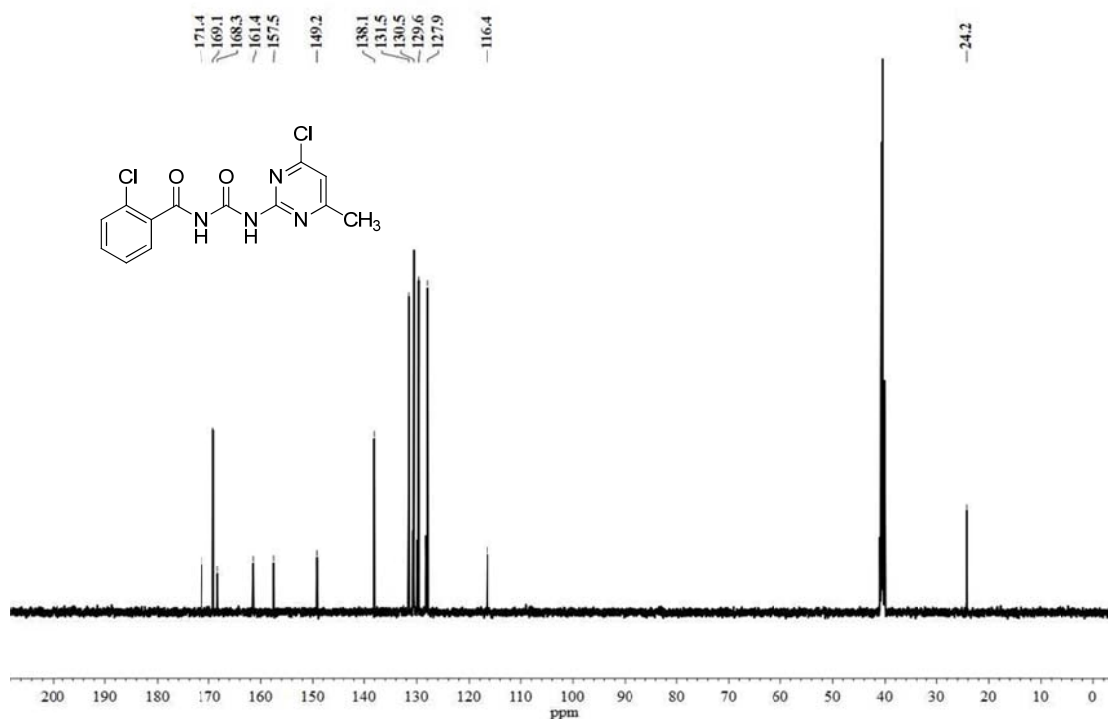

Figure S55 <sup>13</sup>C NMR spectra of compound 15

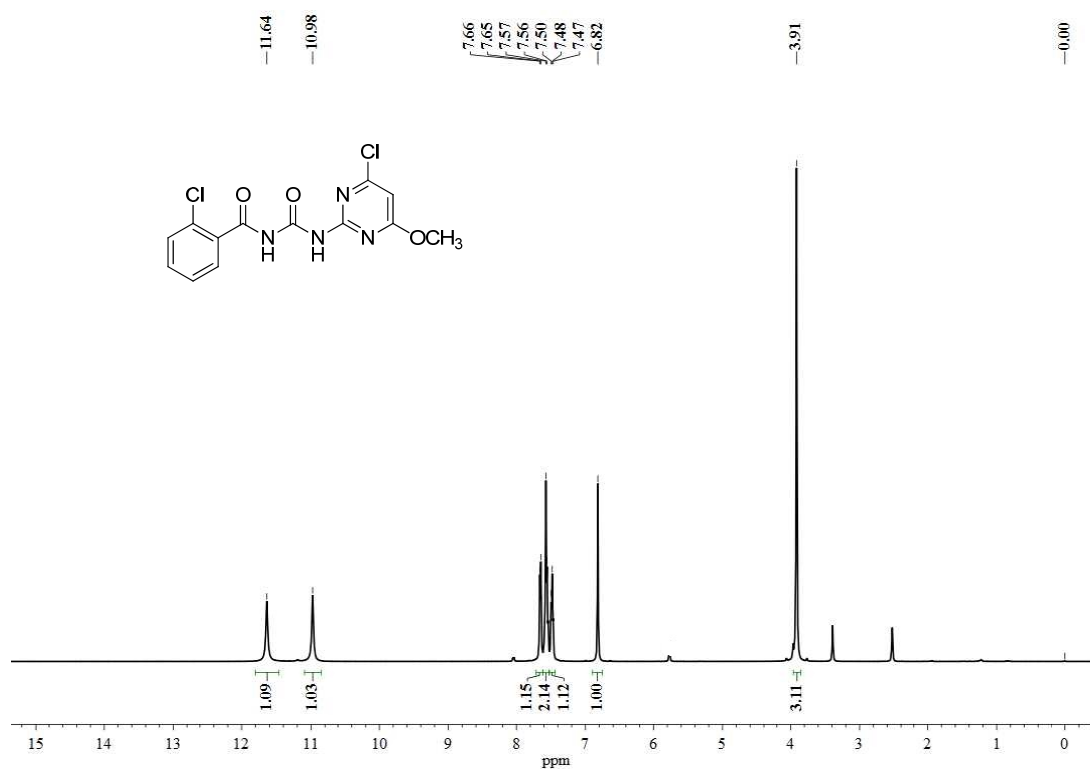

Figure S56 <sup>1</sup>H NMR spectra of compound 16

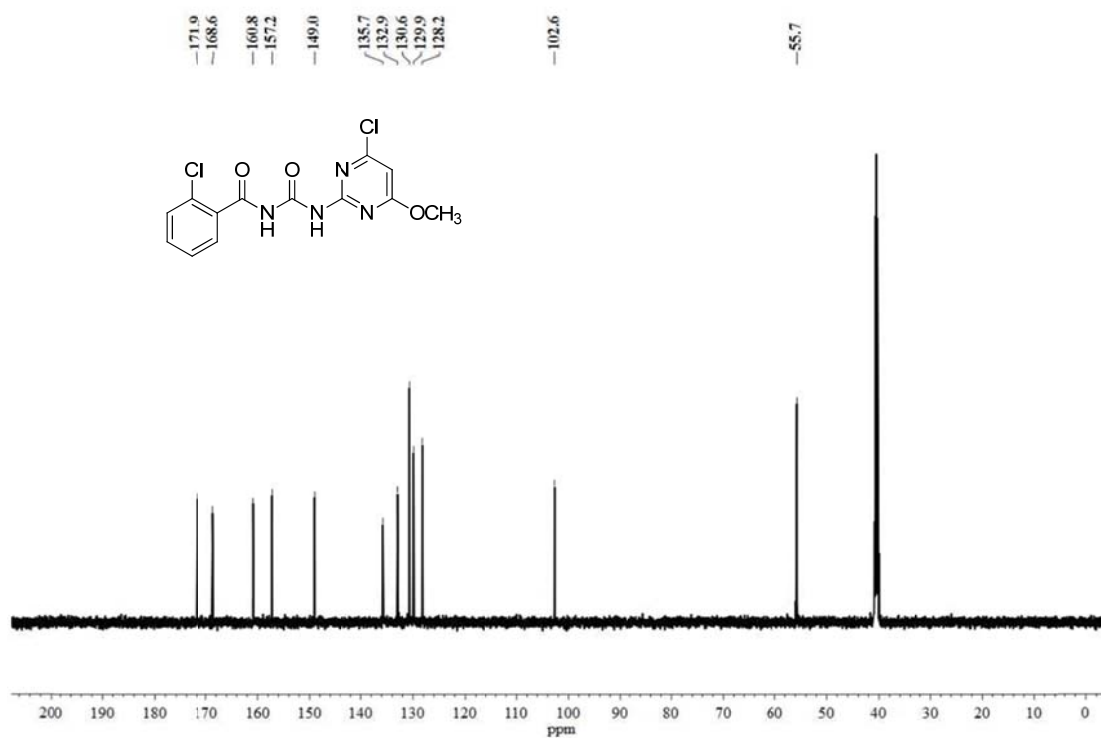

Figure S57 <sup>13</sup>C NMR spectra of compound 16

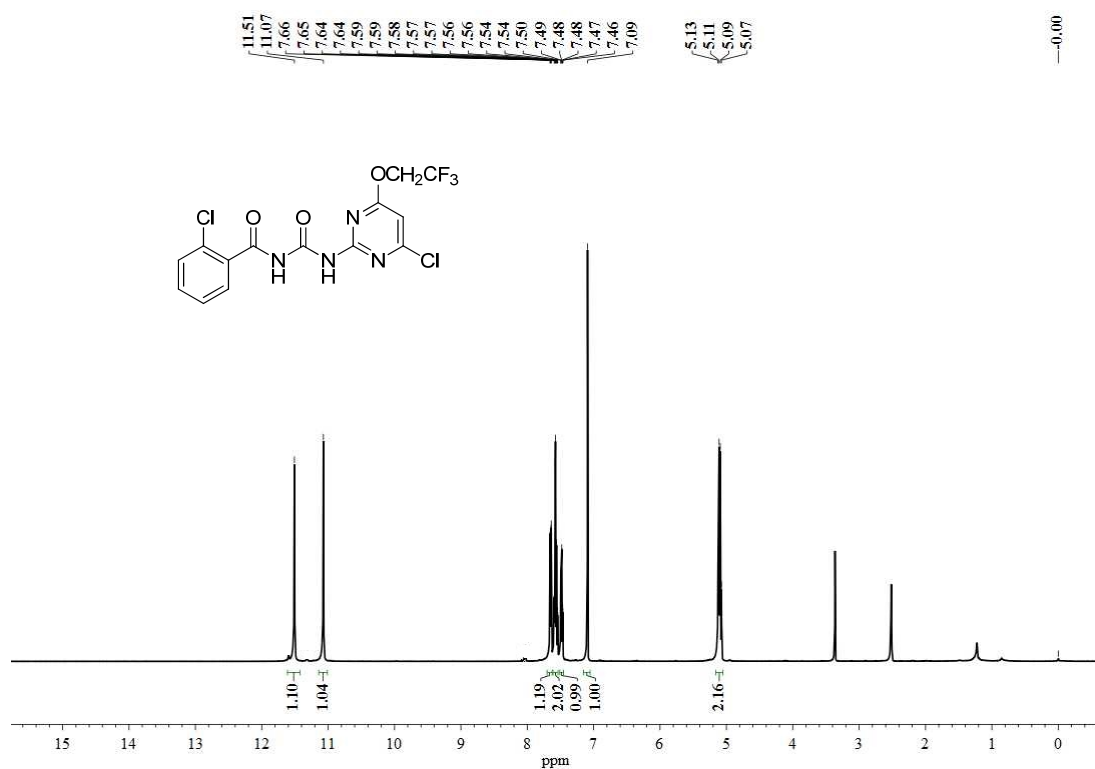

Figure S58 <sup>1</sup>H NMR spectra of compound 17

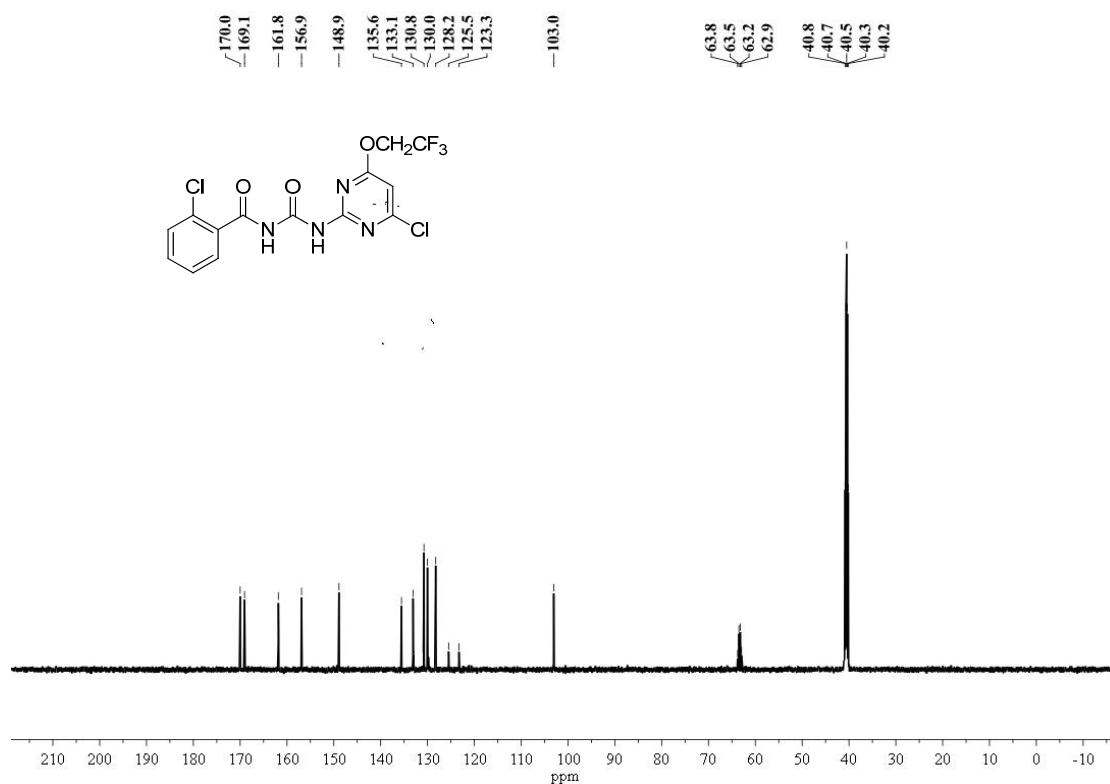

Figure S59 <sup>13</sup>C NMR spectra of compound 17

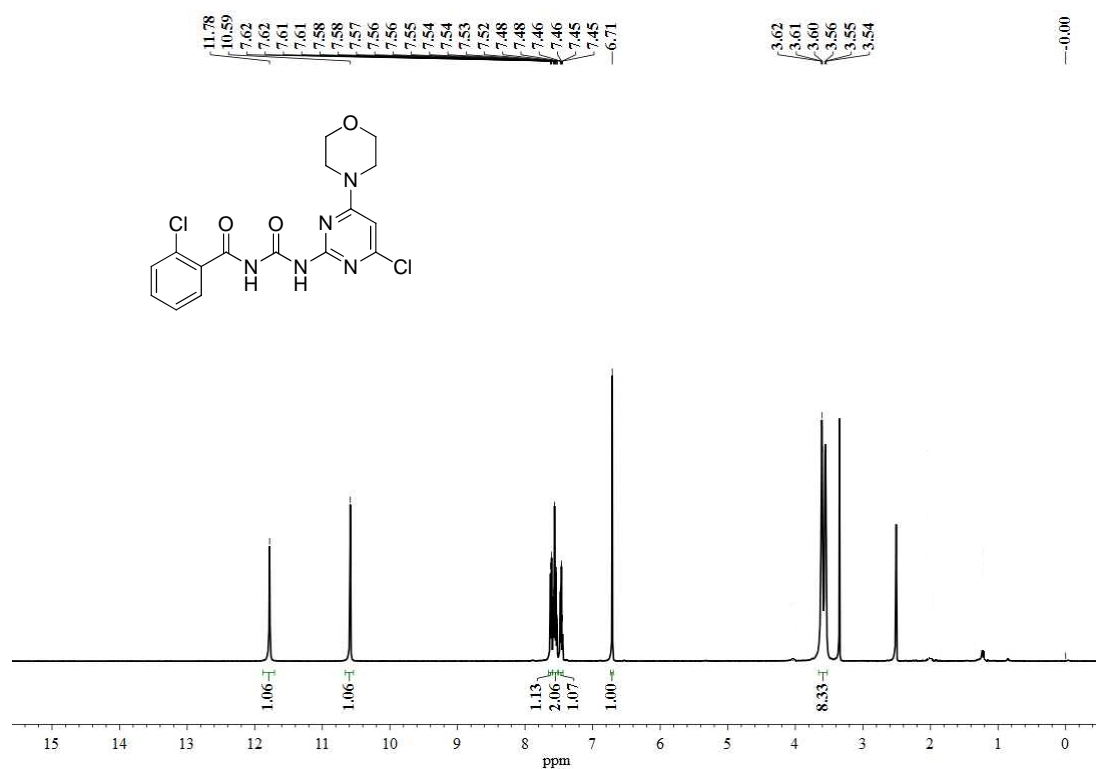

Figure S60 <sup>1</sup>H NMR spectra of compound 18

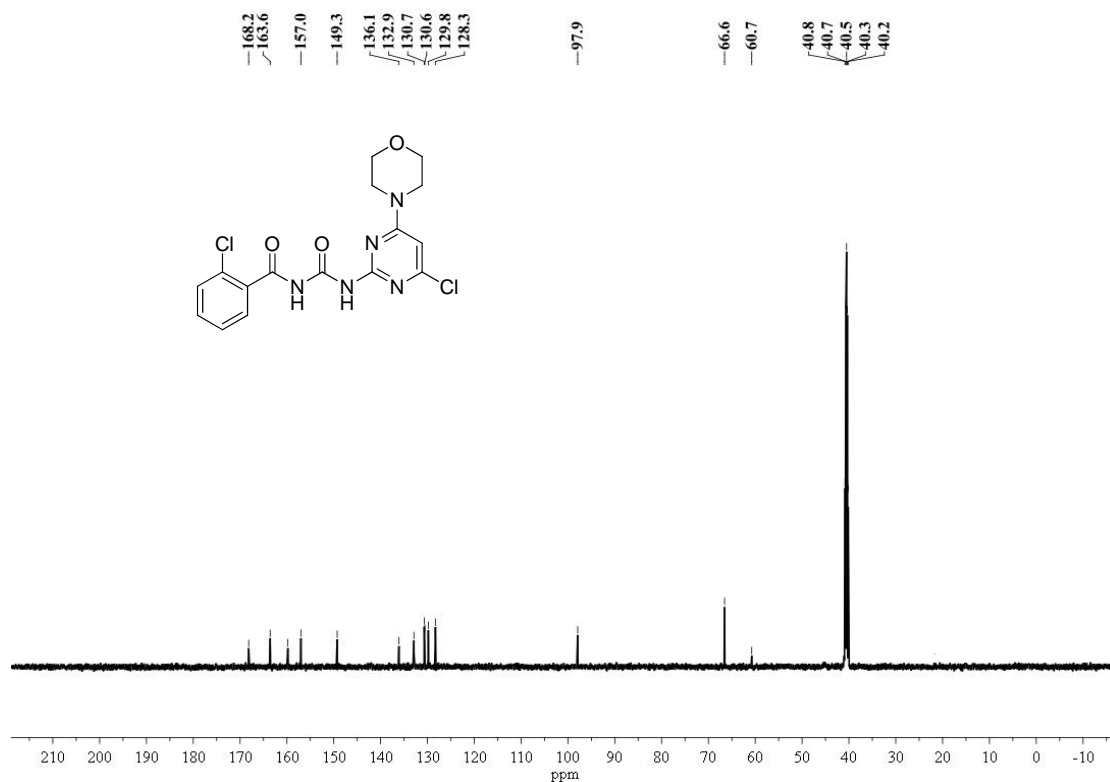

Figure S61 <sup>13</sup>C NMR spectra of compound 18



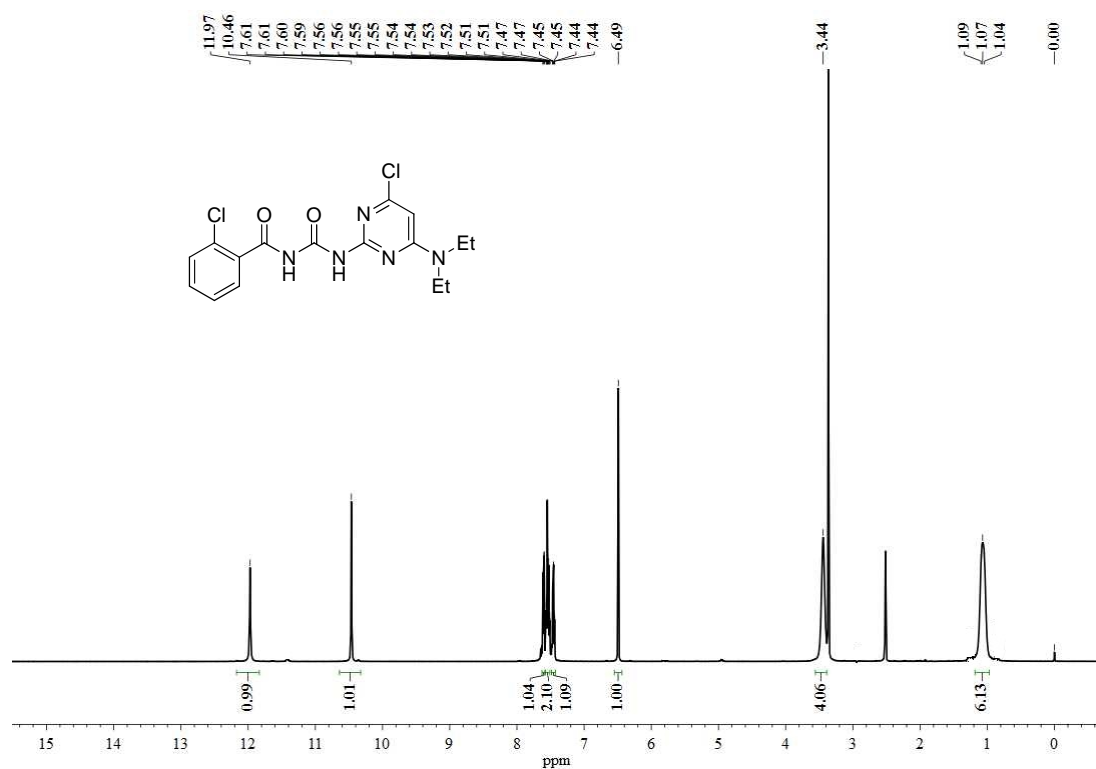

Figure S62 <sup>1</sup>H NMR spectra of compound 19

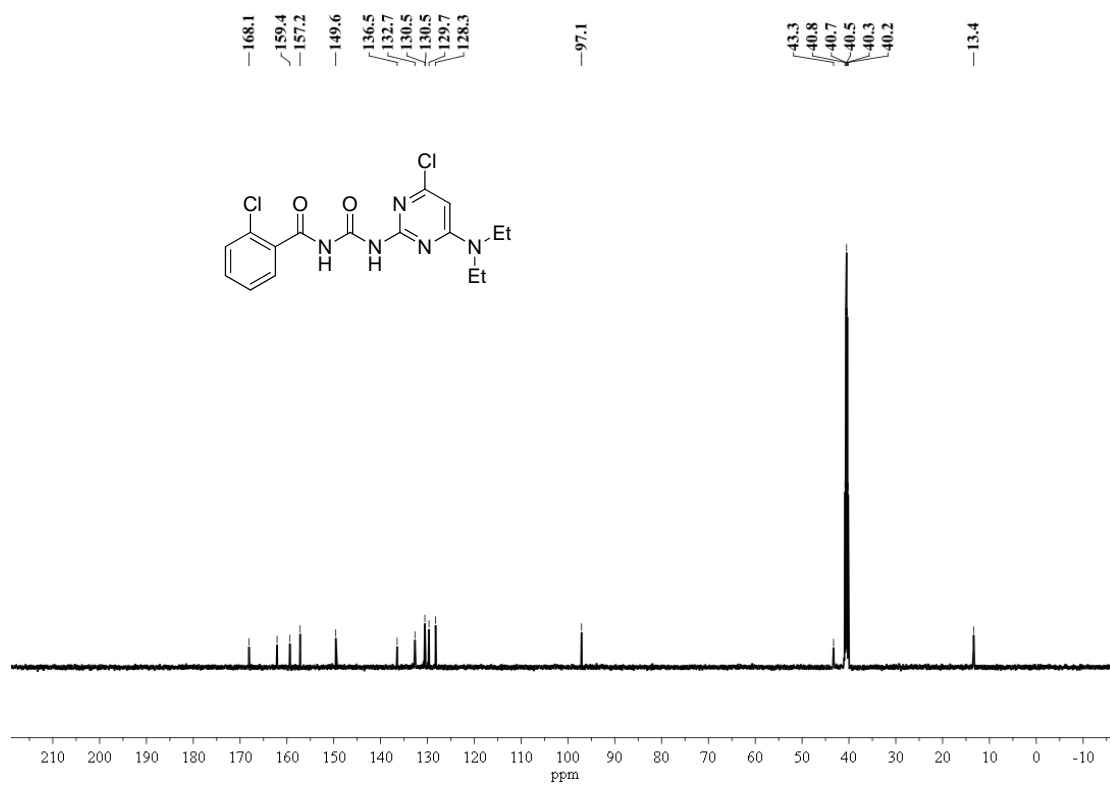

Figure S63 <sup>13</sup>C NMR spectra of compound 19

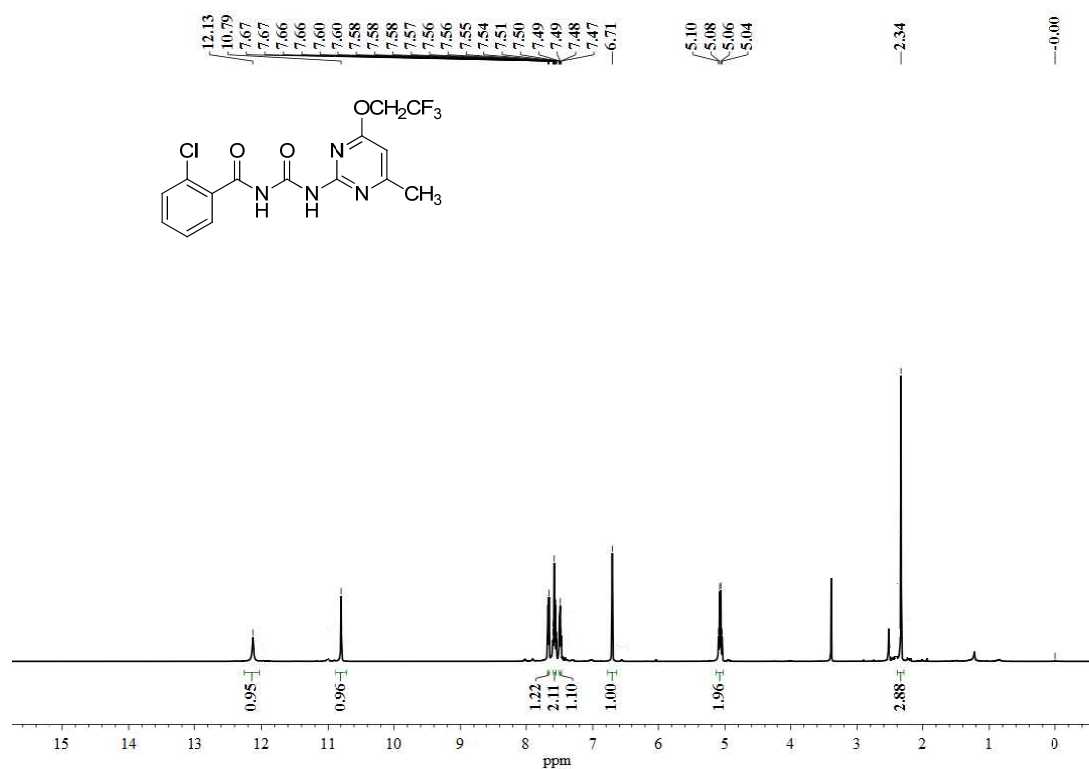

Figure S64 <sup>1</sup>H NMR spectra of compound 20

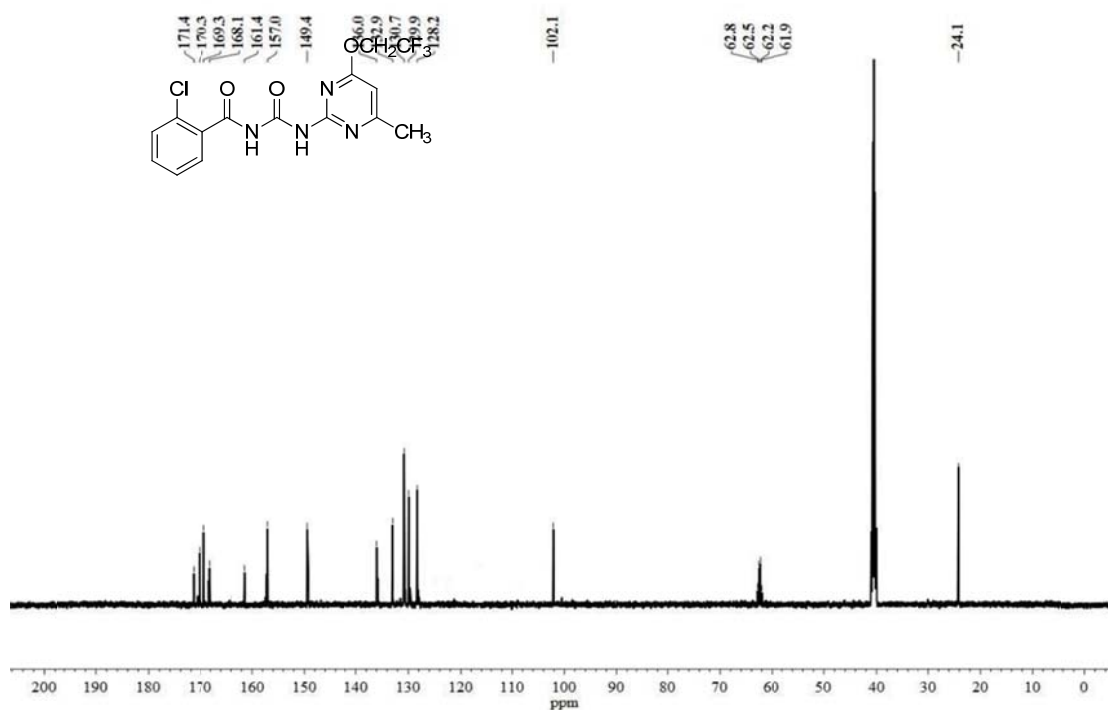

Figure S65 <sup>13</sup>C NMR spectra of compound 20

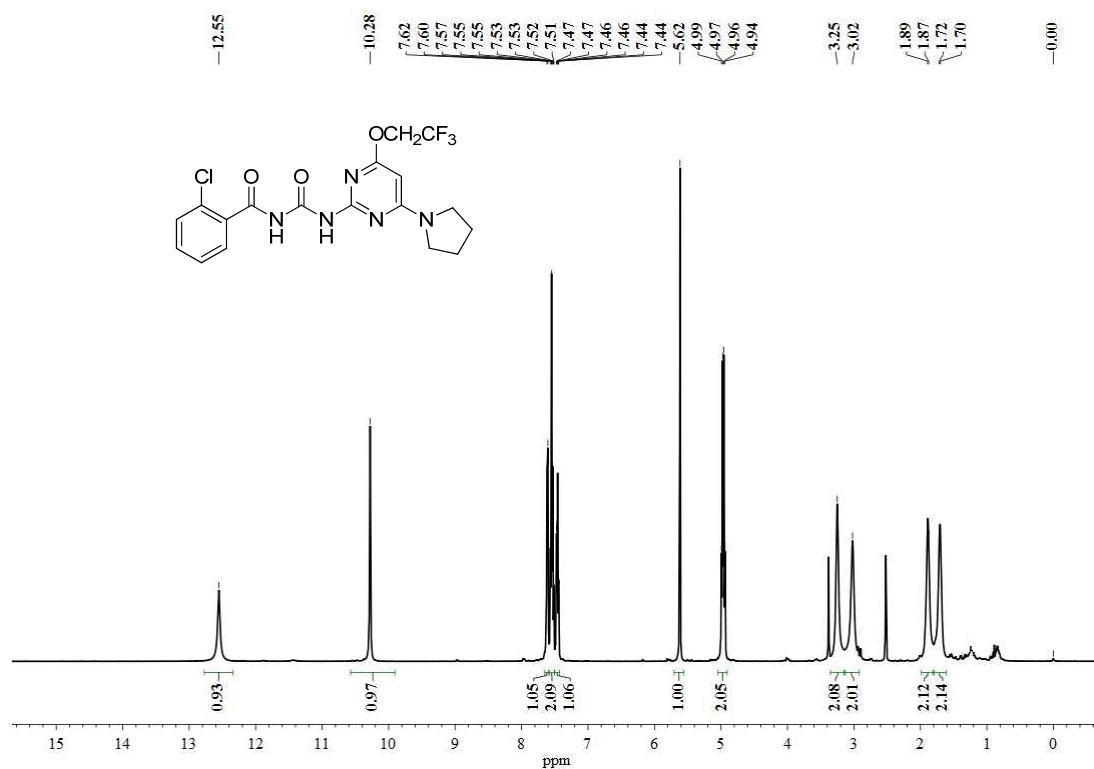

Figure S66 <sup>1</sup>H NMR spectra of compound 21

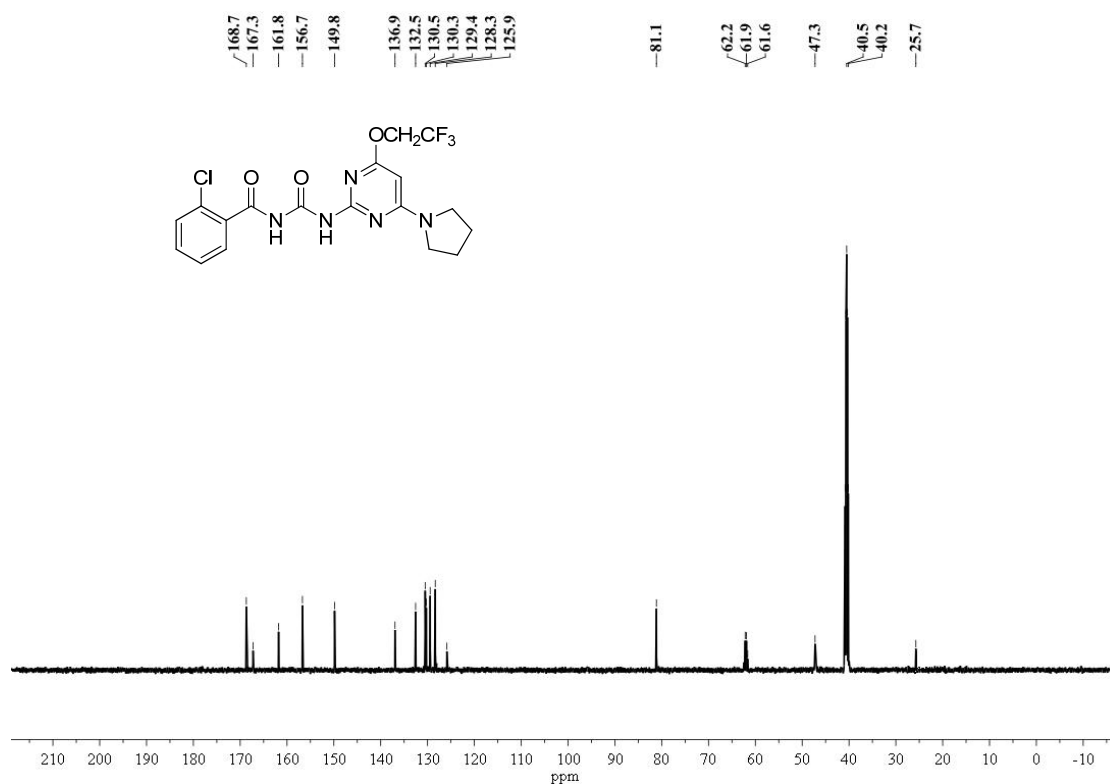

Figure S67 <sup>13</sup>C NMR spectra of compound 21

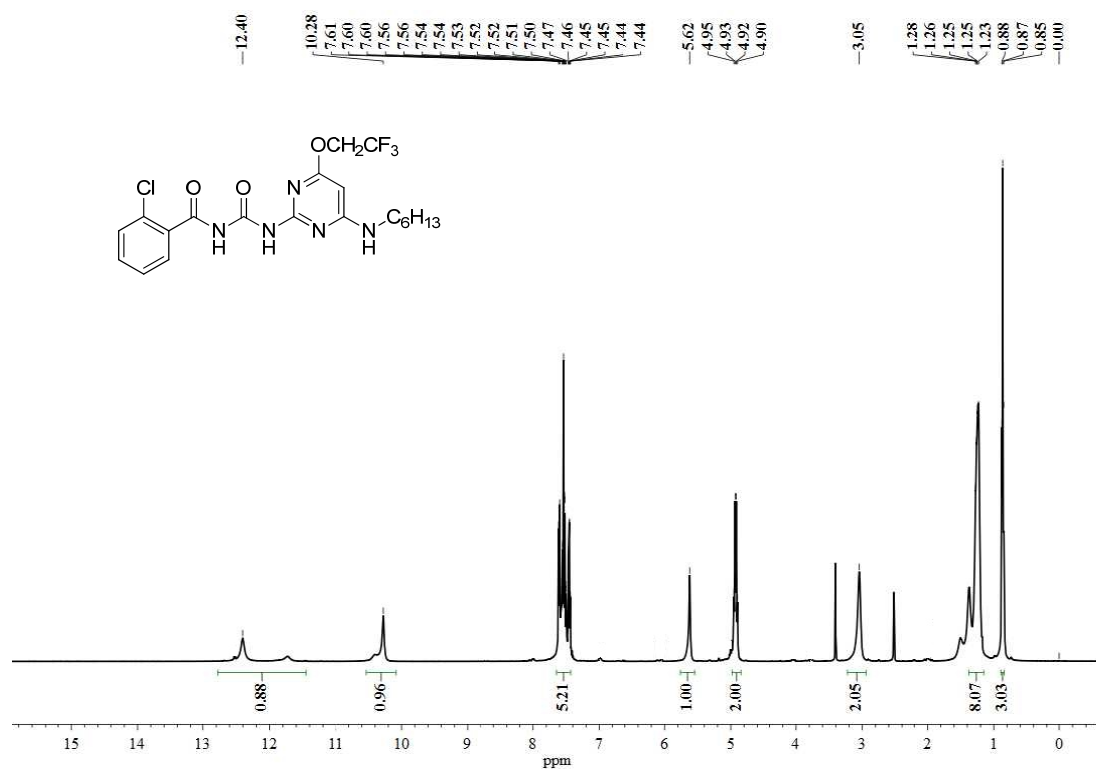

Figure S68 <sup>1</sup>H NMR spectra of compound 22

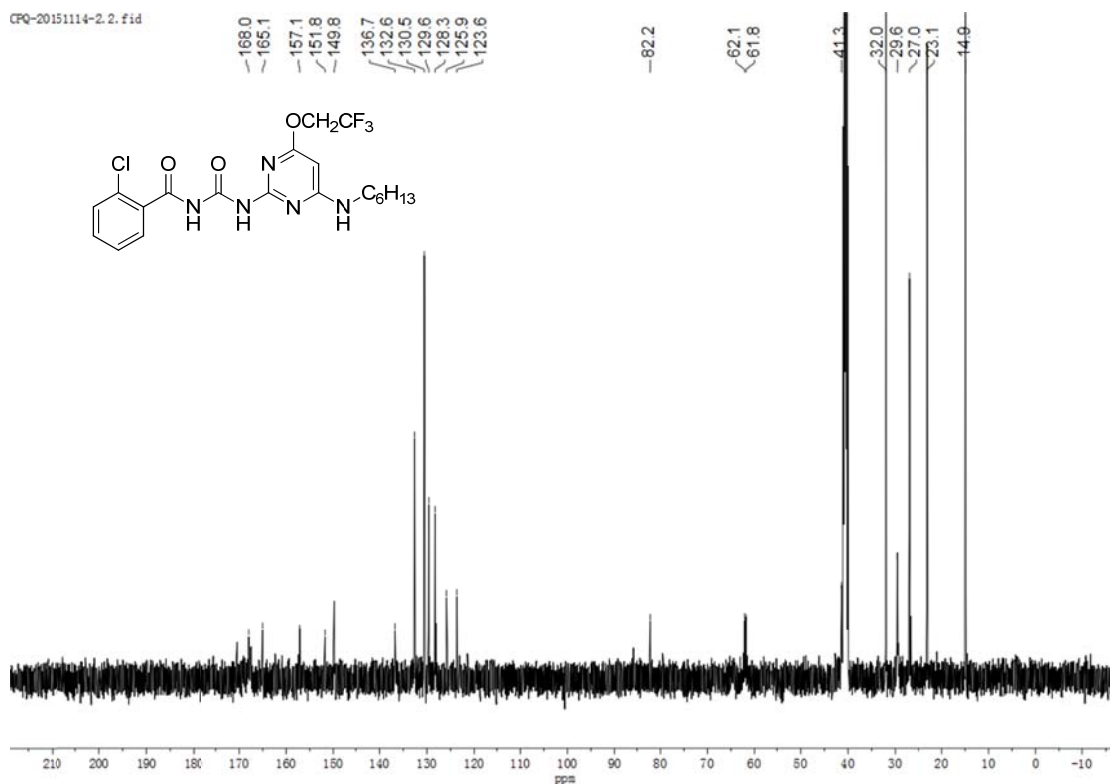

Figure S69 <sup>13</sup>C NMR spectra of compound 22

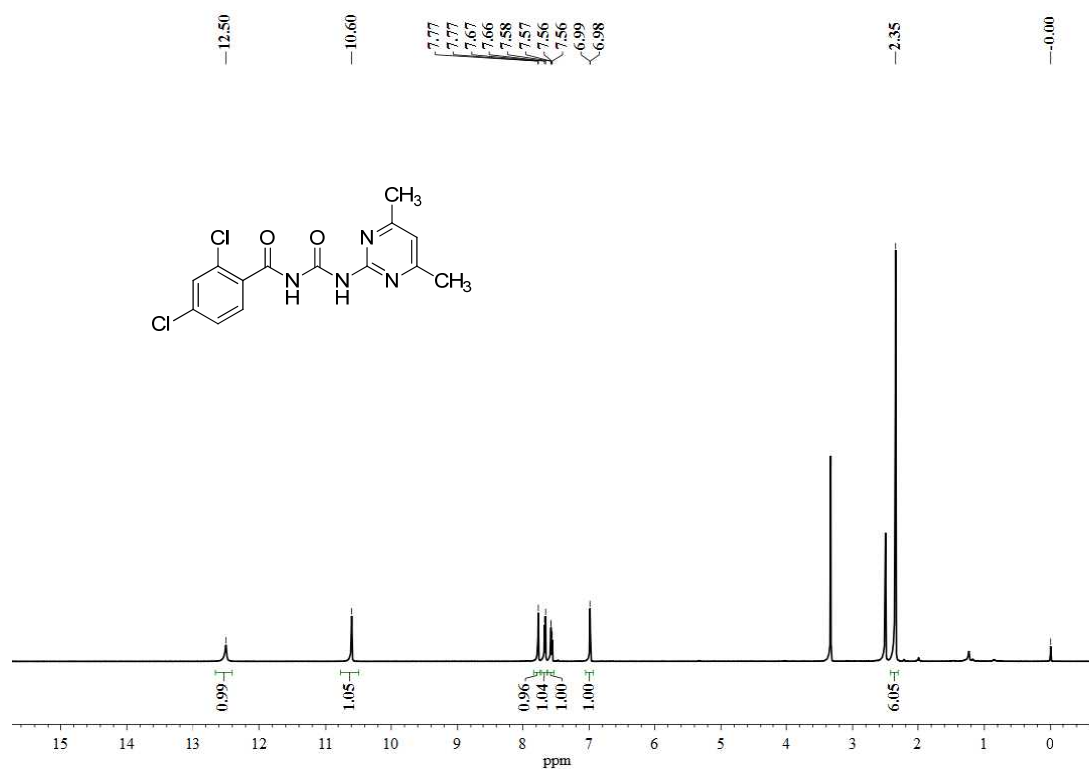

Figure S70 <sup>1</sup>H NMR spectra of compound 23

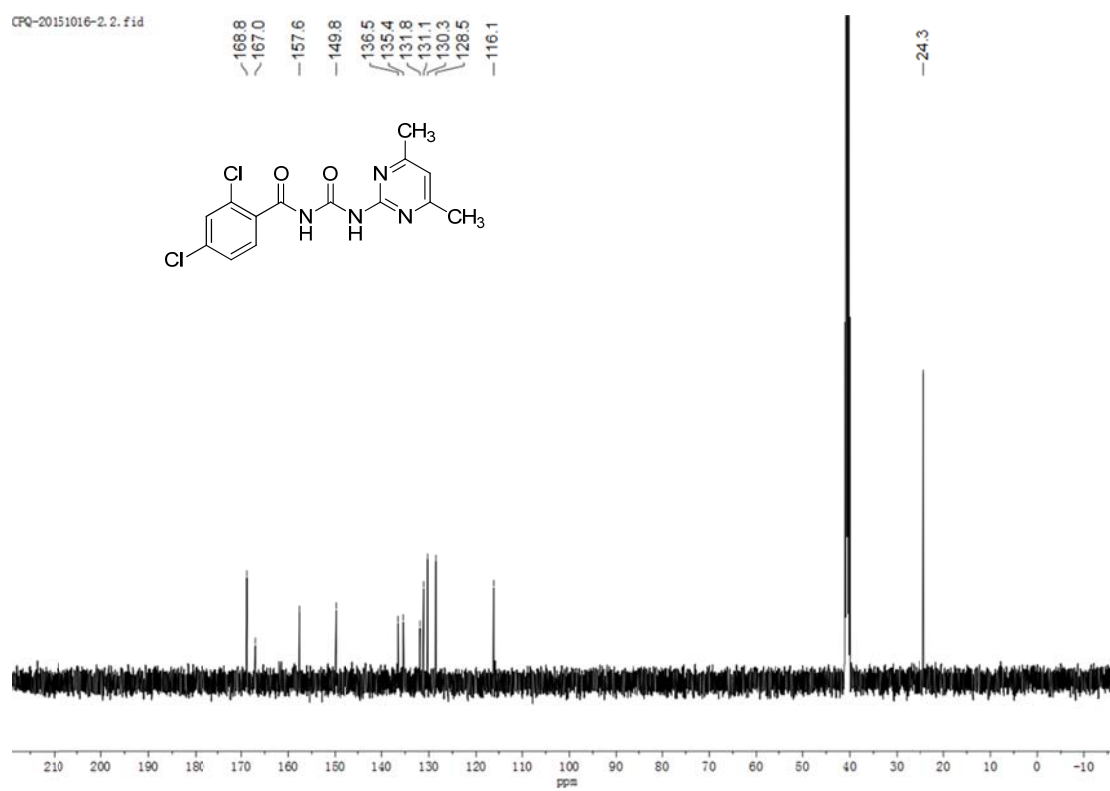

Figure S71 <sup>13</sup>C NMR spectra of compound 23

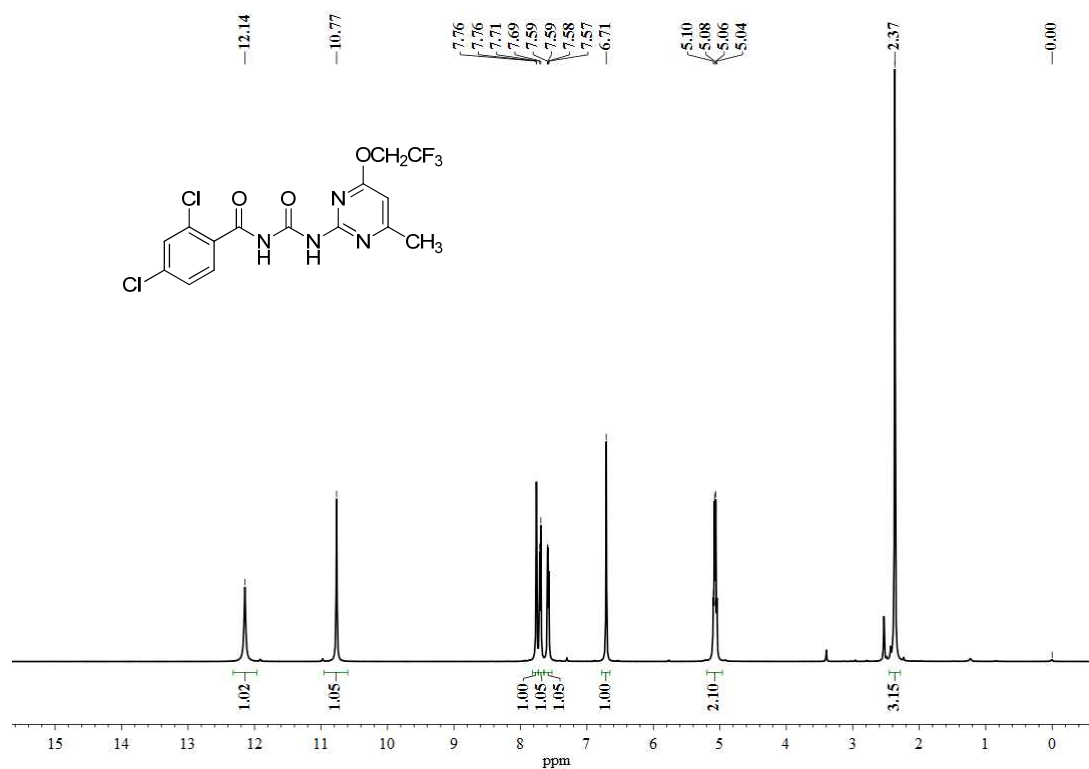

Figure S72 <sup>1</sup>H NMR spectra of compound 24

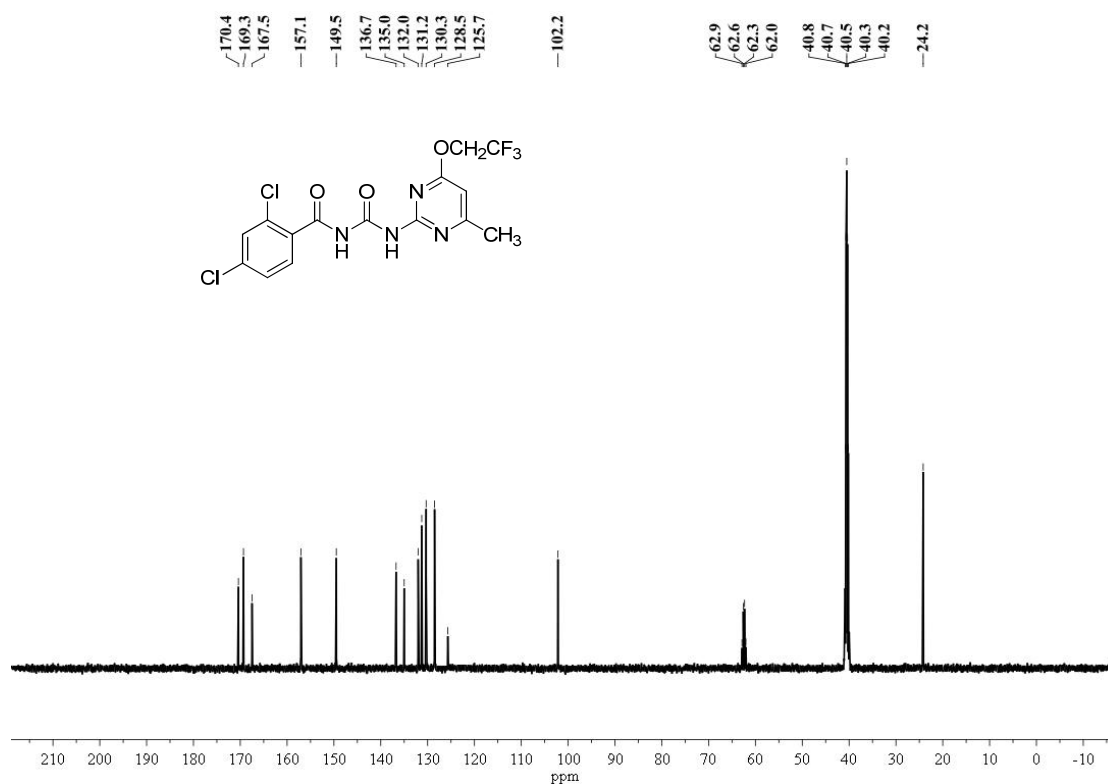

Figure S73 <sup>13</sup>C NMR spectra of compound 24

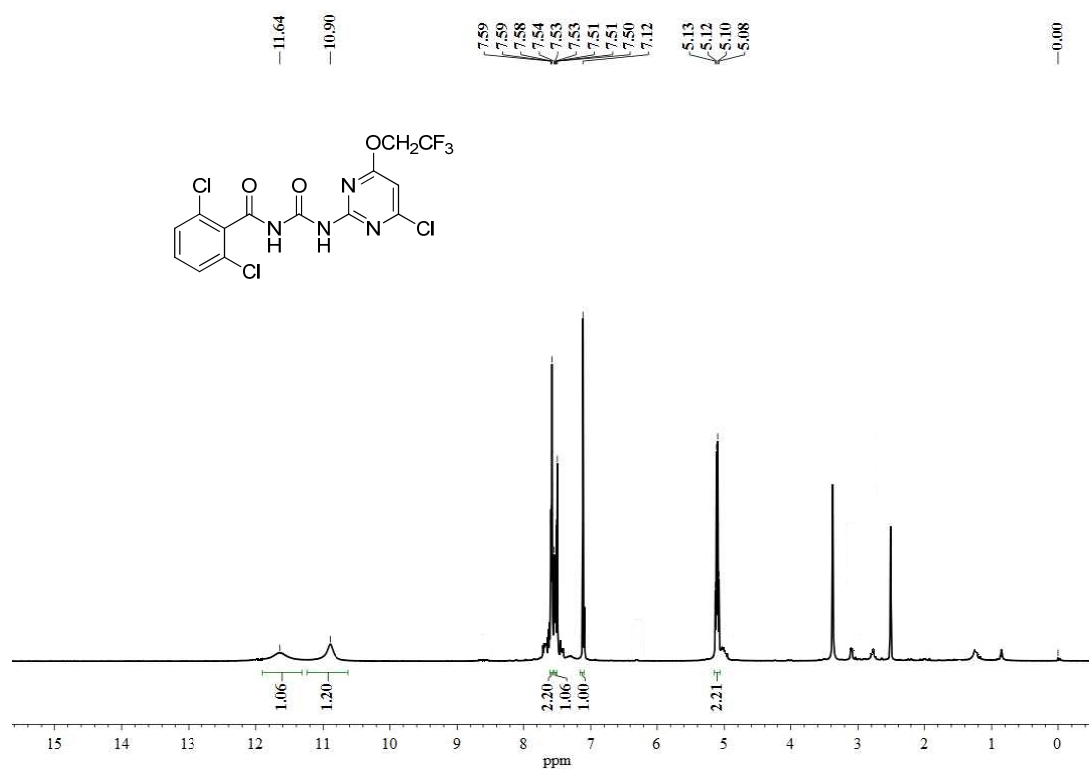

Figure S74 <sup>1</sup>H NMR spectra of compound 25

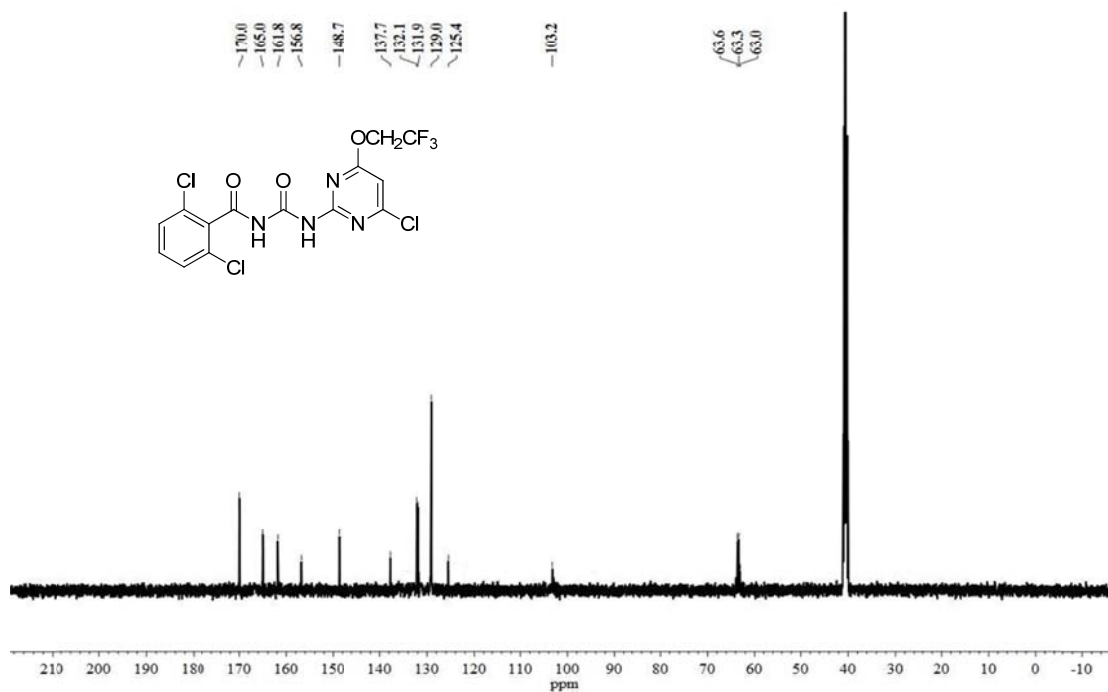

Figure S75 <sup>13</sup>C NMR spectra of compound 25

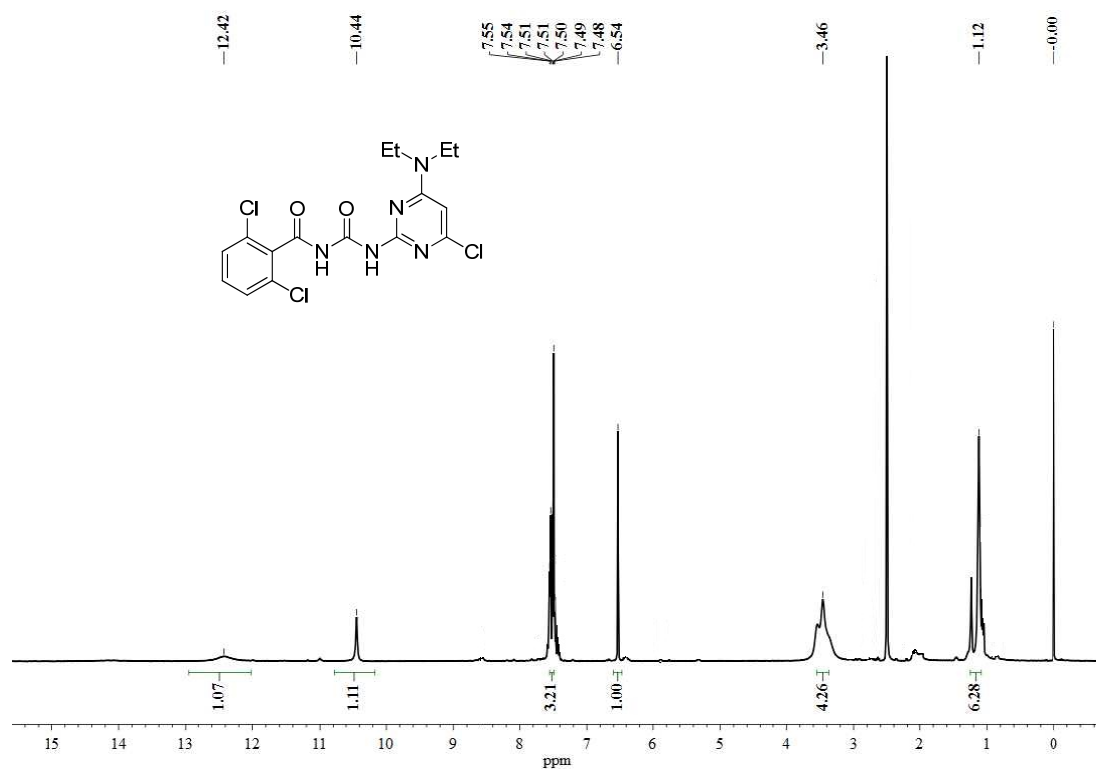

Figure S76 <sup>1</sup>H NMR spectra of compound 26

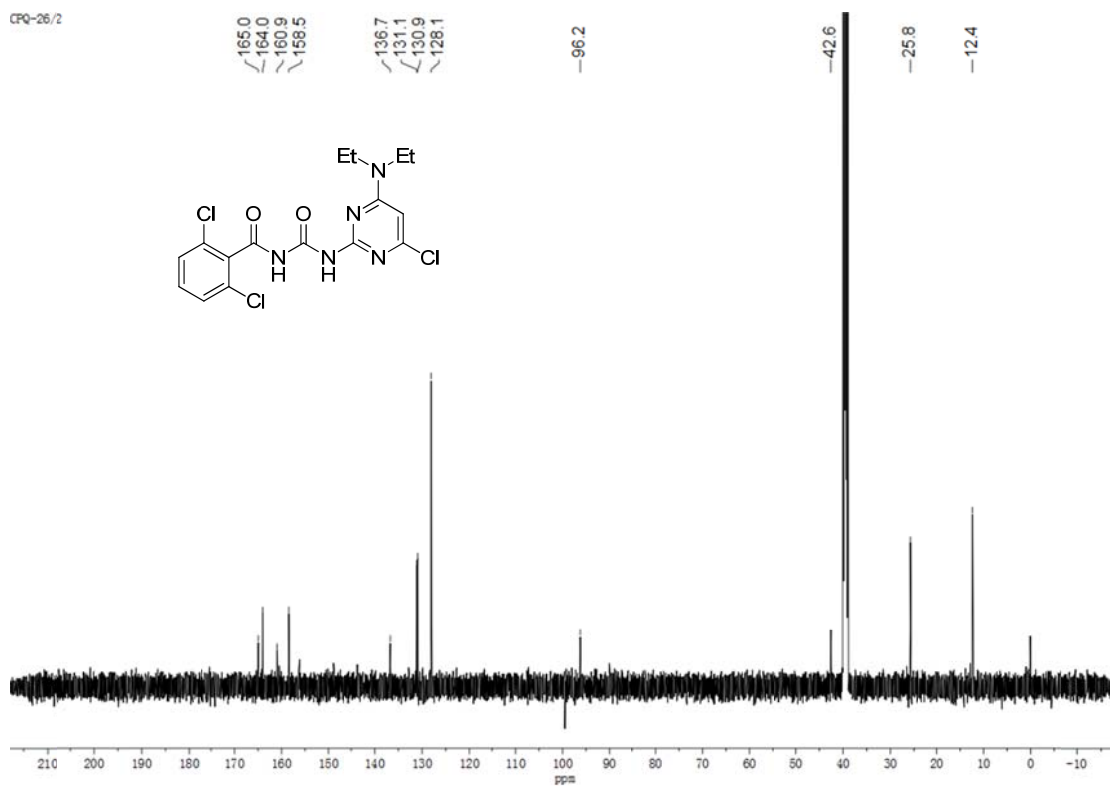

Figure S77 <sup>13</sup>C NMR spectra of compound 26



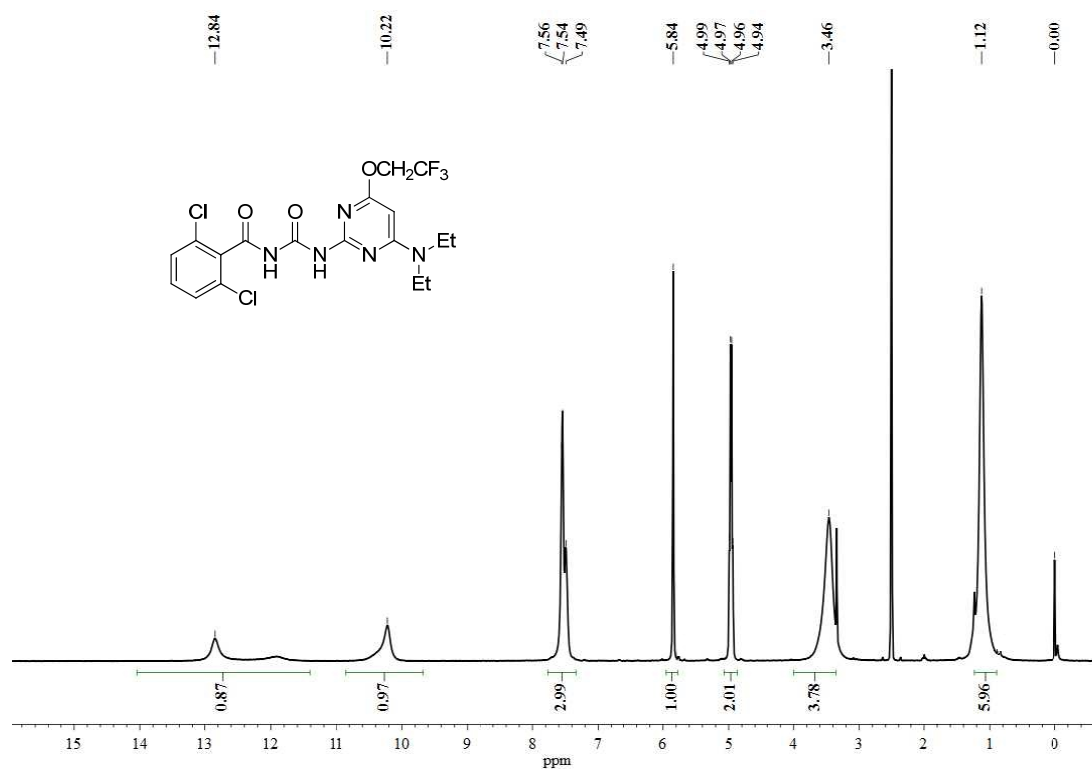

Figure S78 <sup>1</sup>H NMR spectra of compound 27

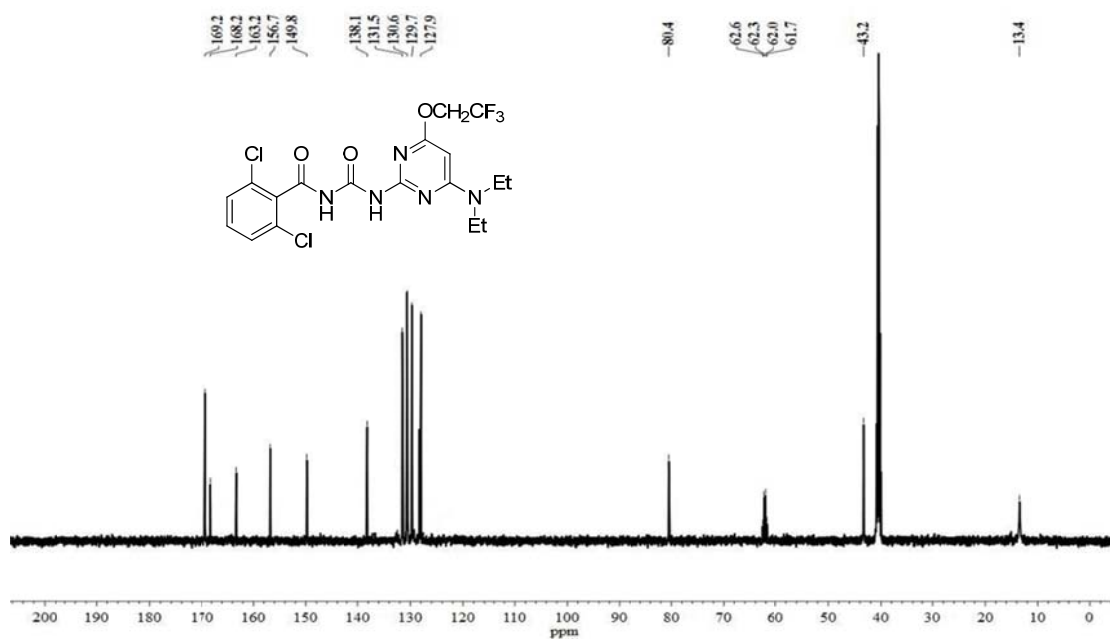

Figure S79 <sup>13</sup>C NMR spectra of compound 27

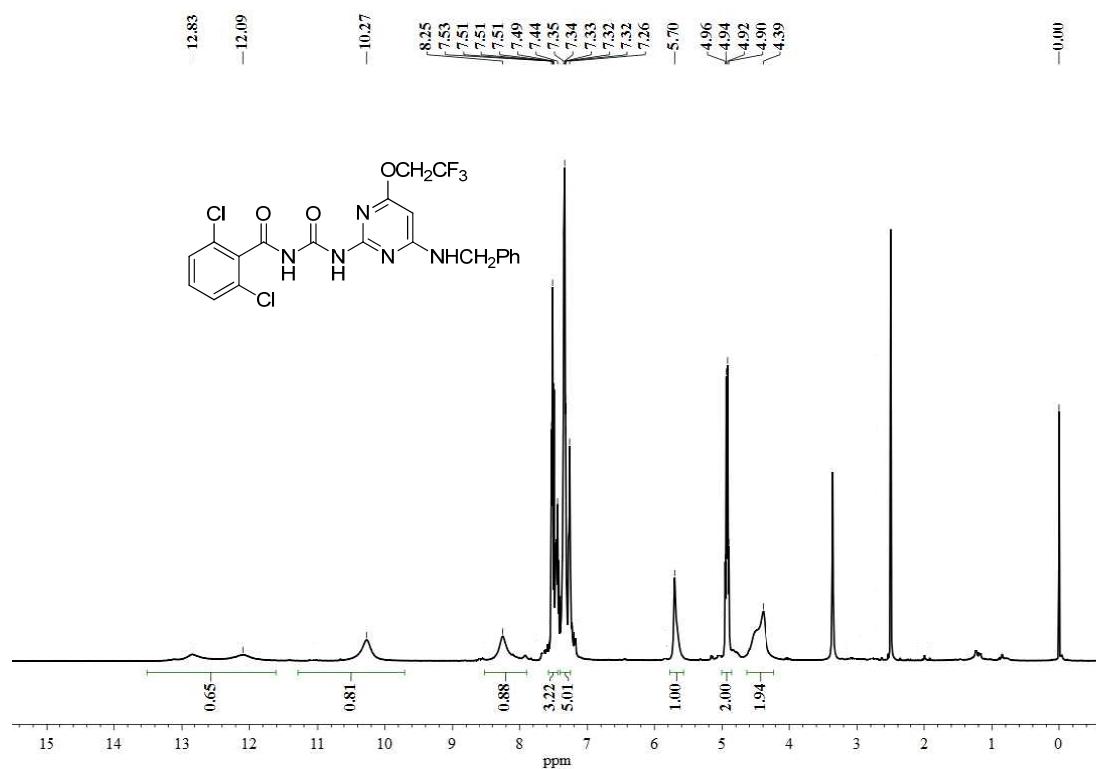

Figure S80 <sup>1</sup>H NMR spectra of compound 28

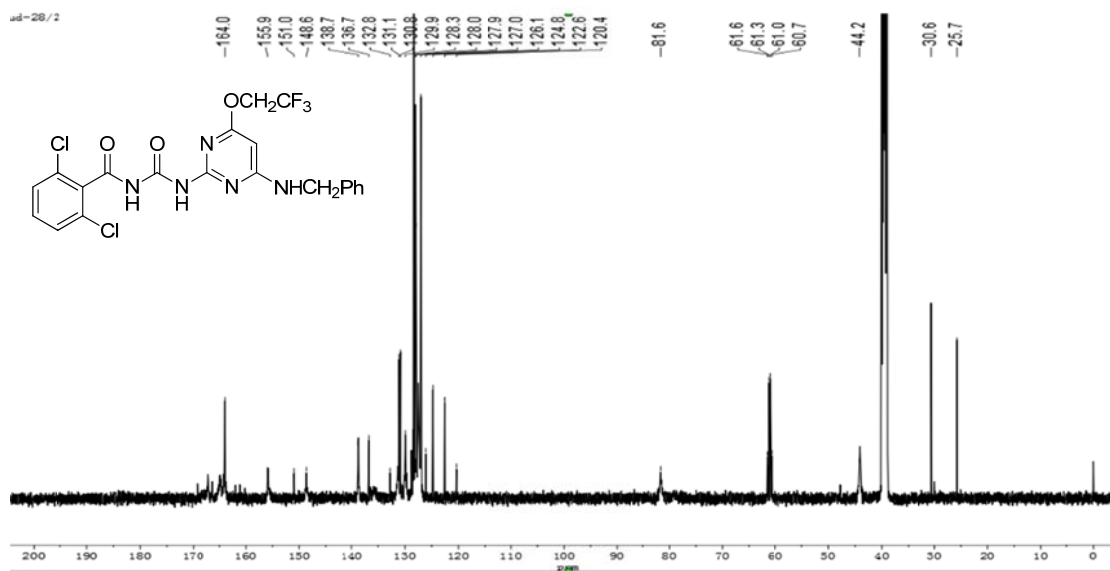

Figure S81 <sup>13</sup>C NMR spectra of compound 28

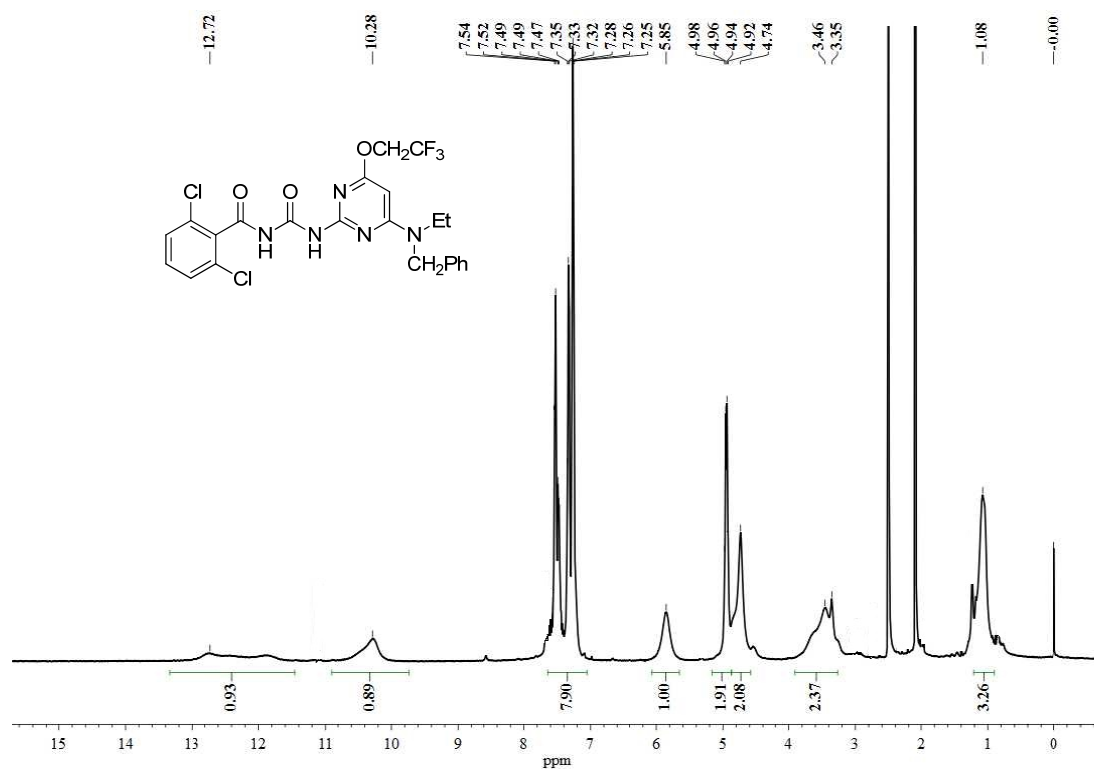

Figure S82 <sup>1</sup>H NMR spectra of compound 29

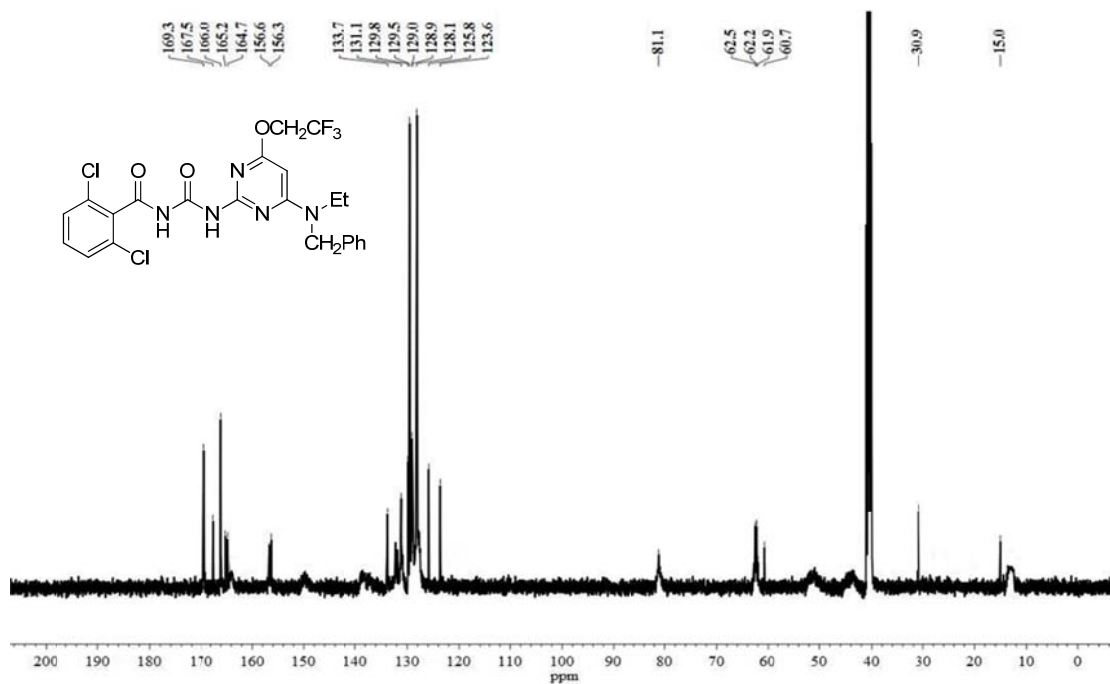

Figure S83 <sup>13</sup>C NMR spectra of compound 29

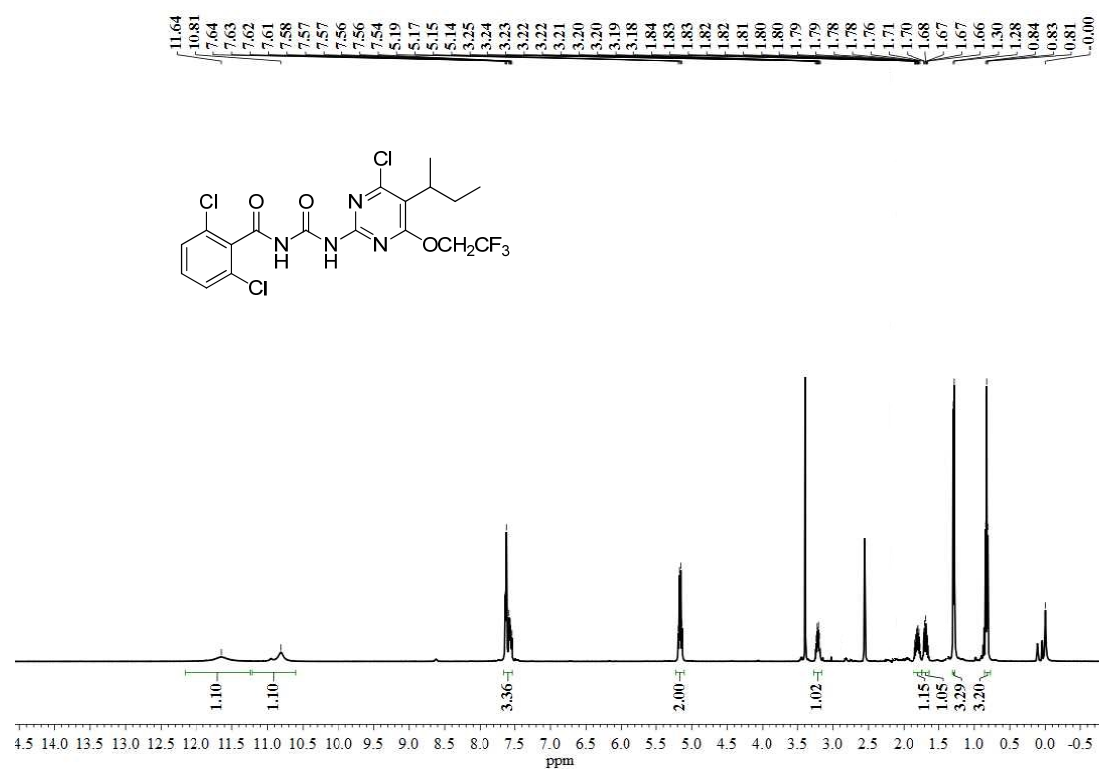

Figure S84 <sup>1</sup>H NMR spectra of compound 30

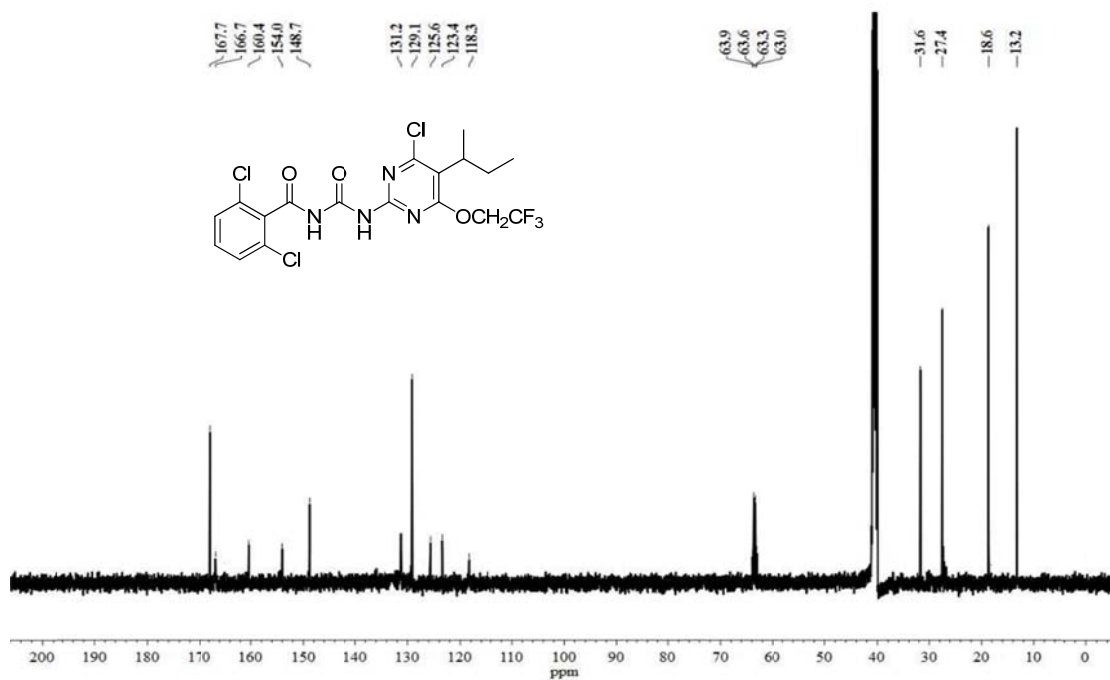

Figure S85 <sup>13</sup>C NMR spectra of compound 30

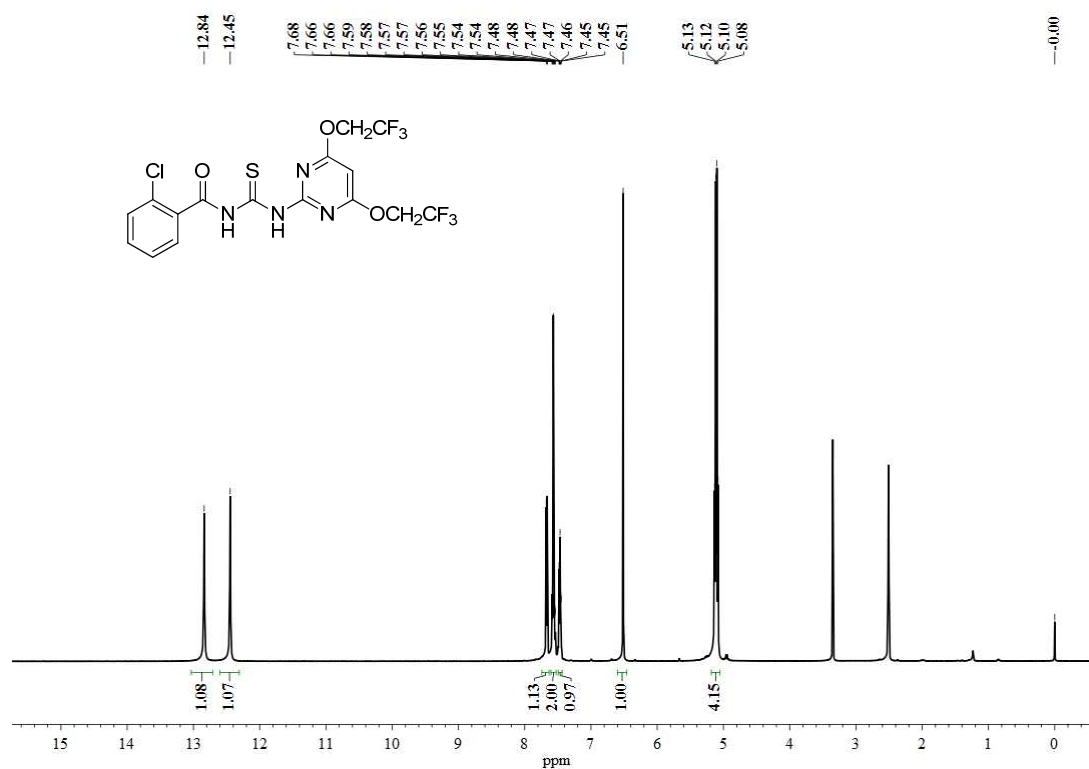

Figure S86 <sup>1</sup>H NMR spectra of compound 31

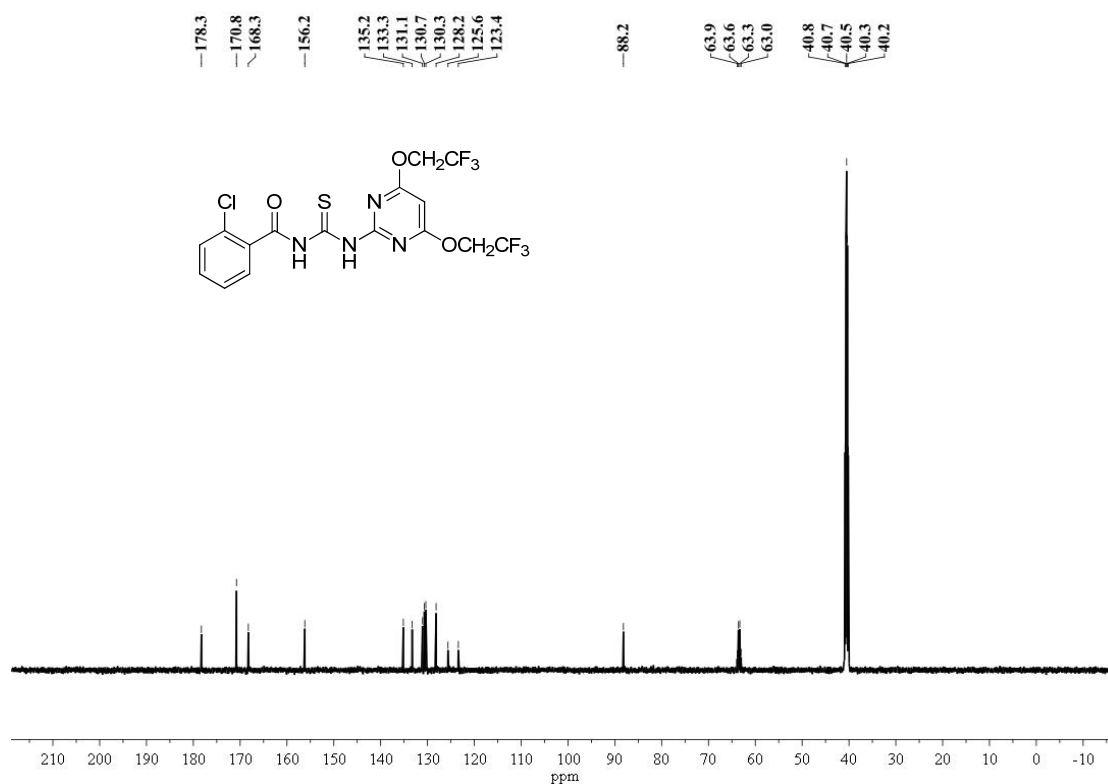

Figure S87 <sup>13</sup>C NMR spectra of compound 31

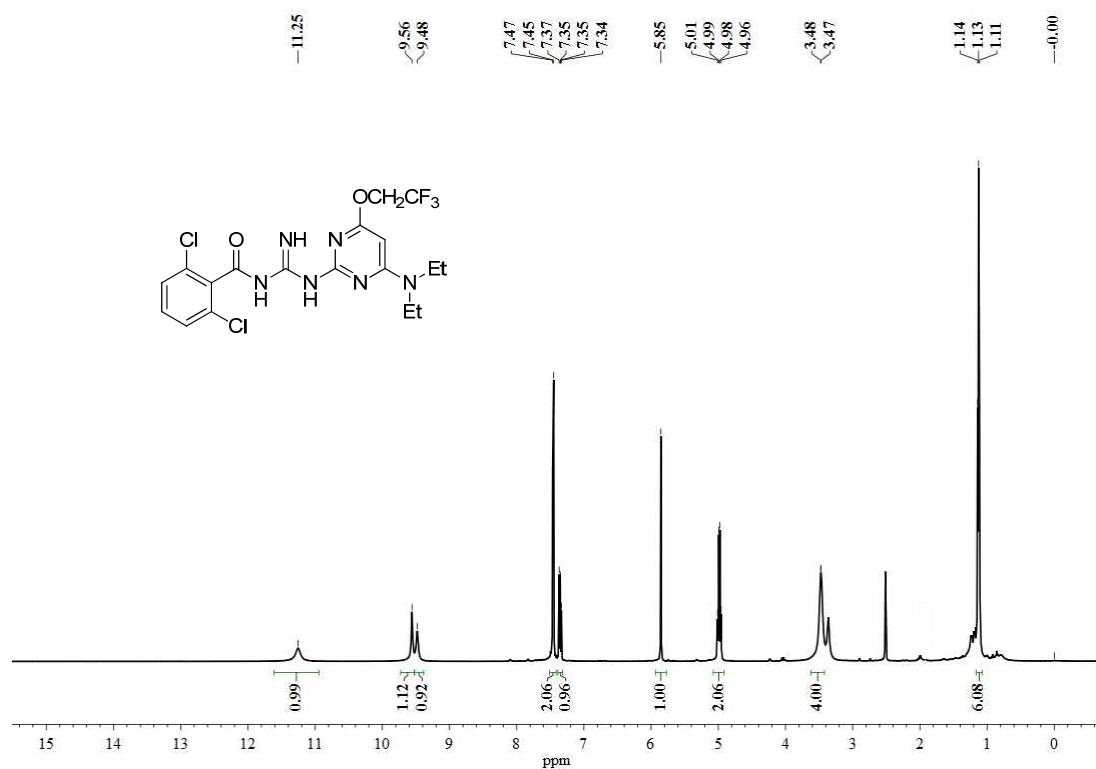

Figure S88 <sup>1</sup>H NMR spectra of compound 32

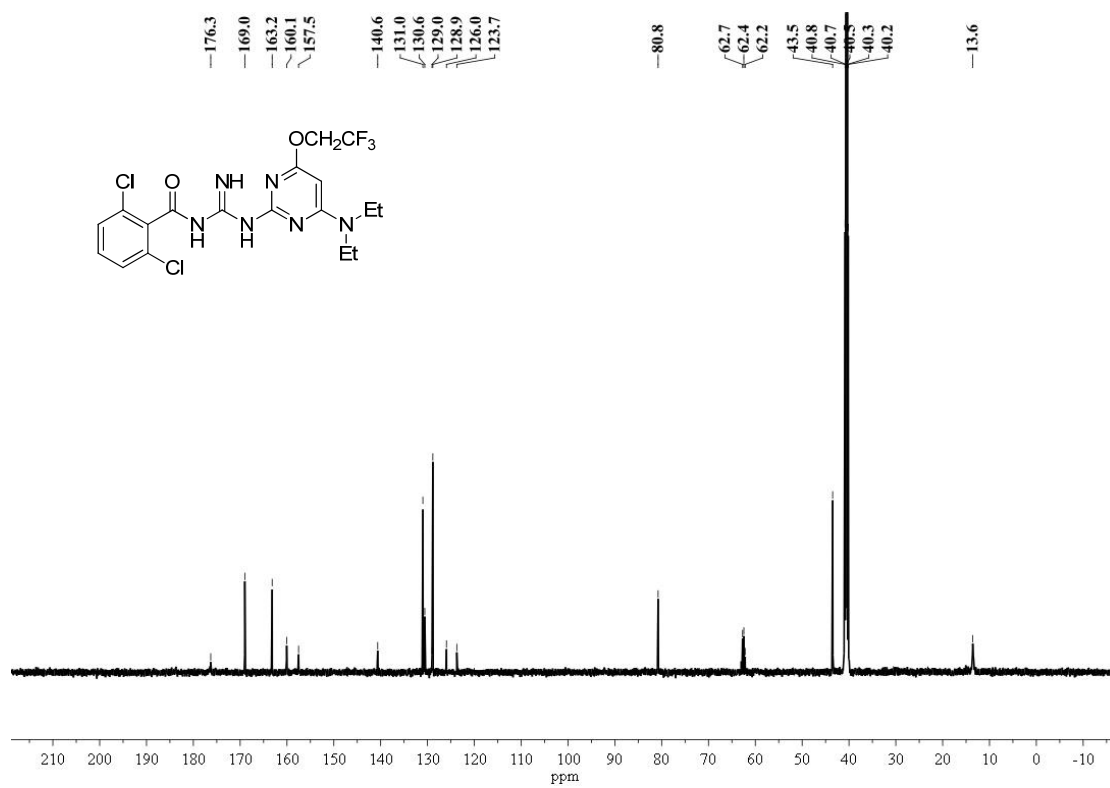

Figure S89 <sup>13</sup>C NMR spectra of compound 32

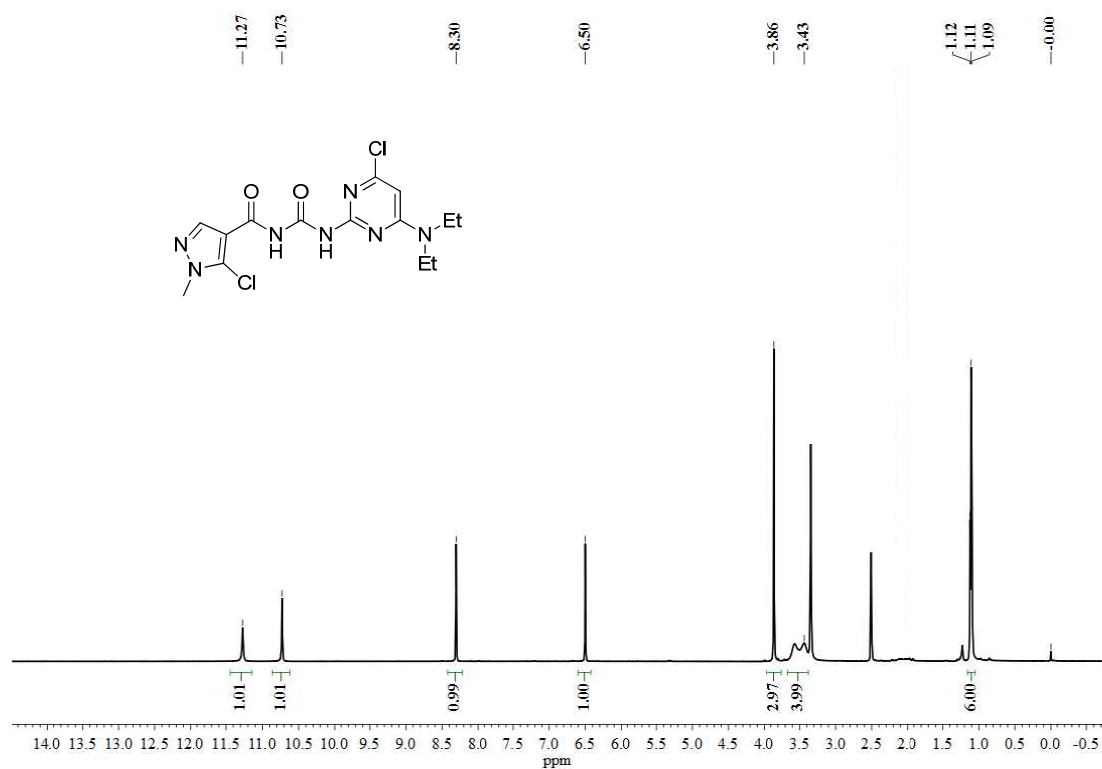

Figure S90 <sup>1</sup>H NMR spectra of compound 33

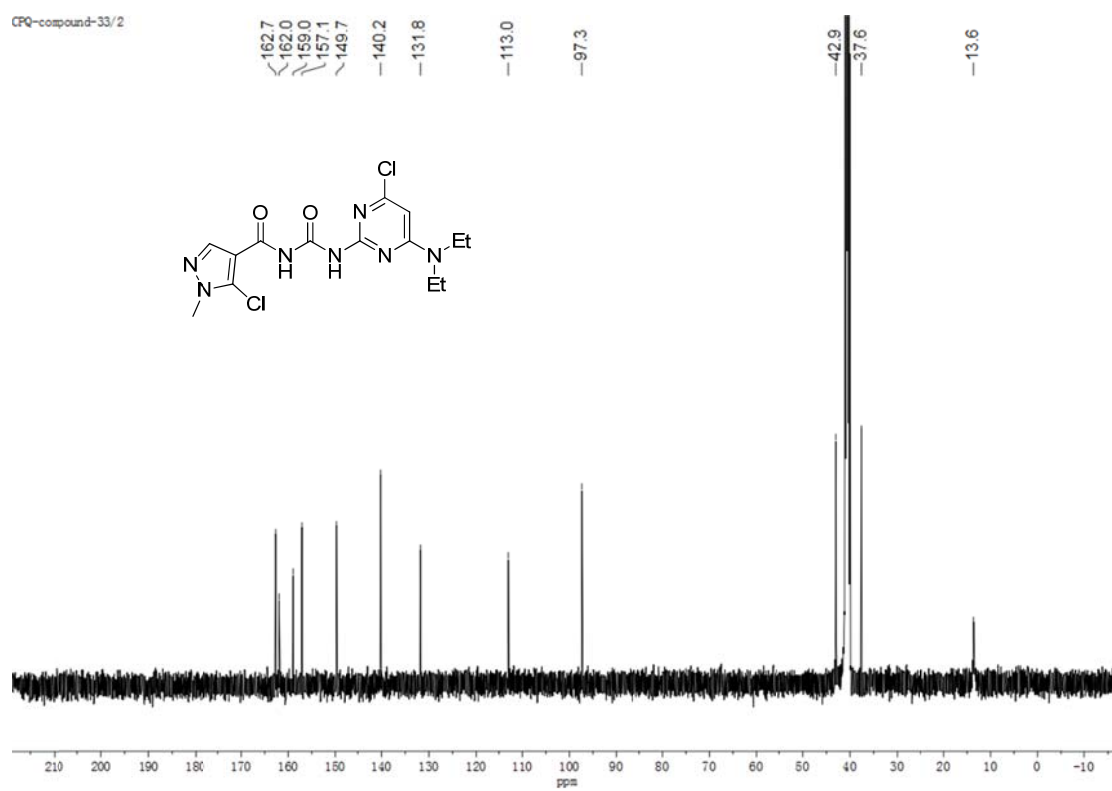

Figure S91 <sup>13</sup>C NMR spectra of compound 33

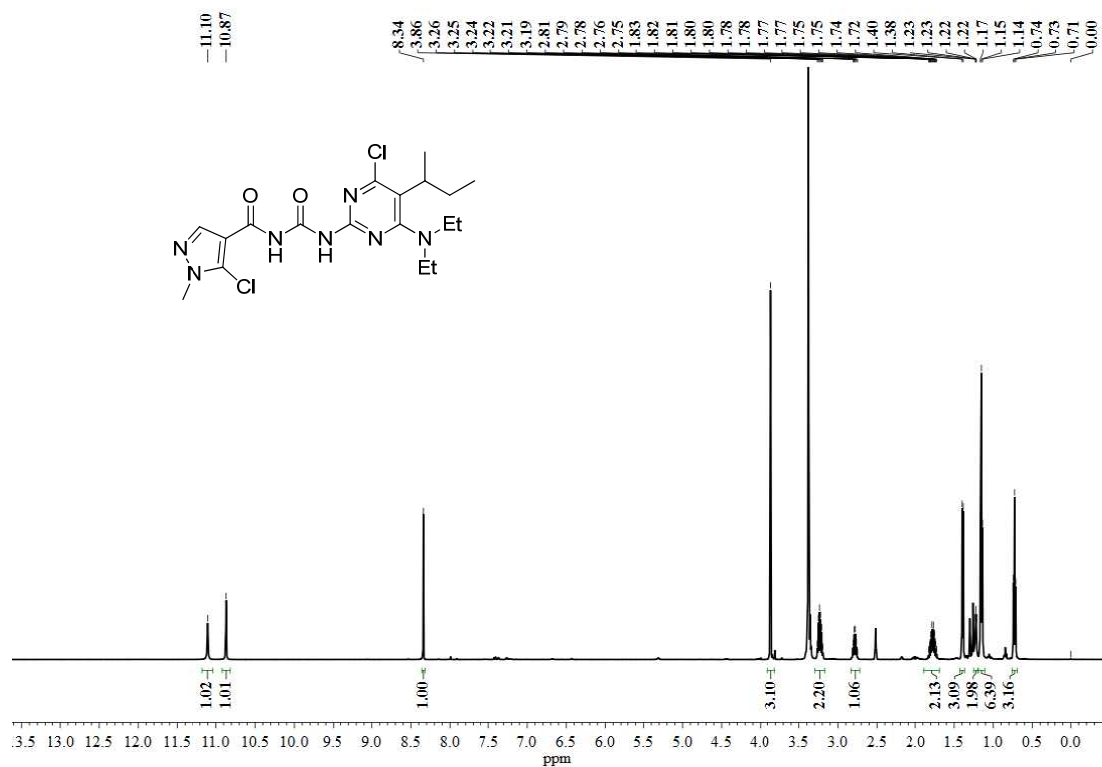

Figure S92  $^1\text{H}$  NMR spectra of compound 34

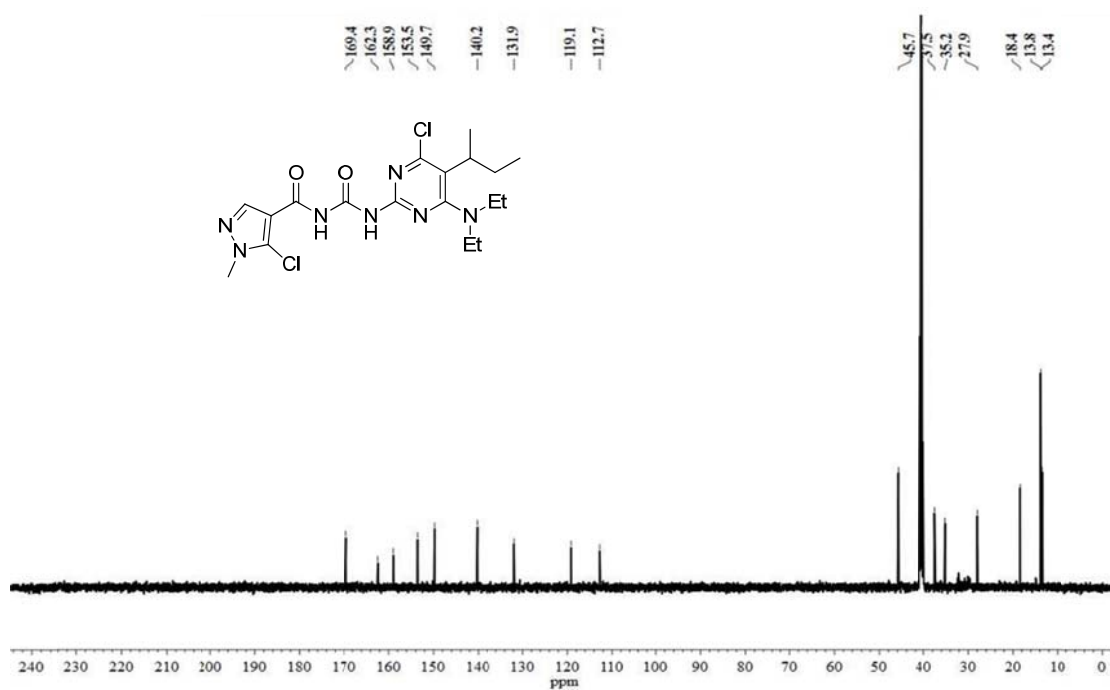

Figure S93  $^{13}\text{C}$  NMR spectra of compound 34



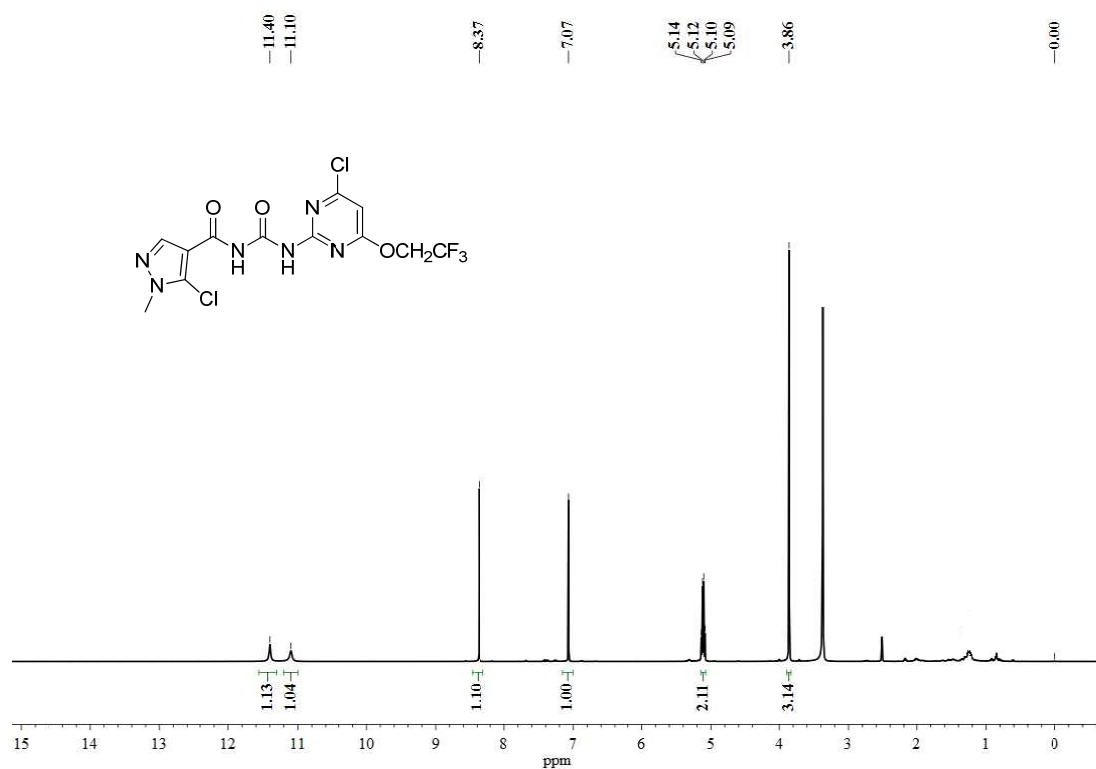

Figure S94 <sup>1</sup>H NMR spectra of compound 35

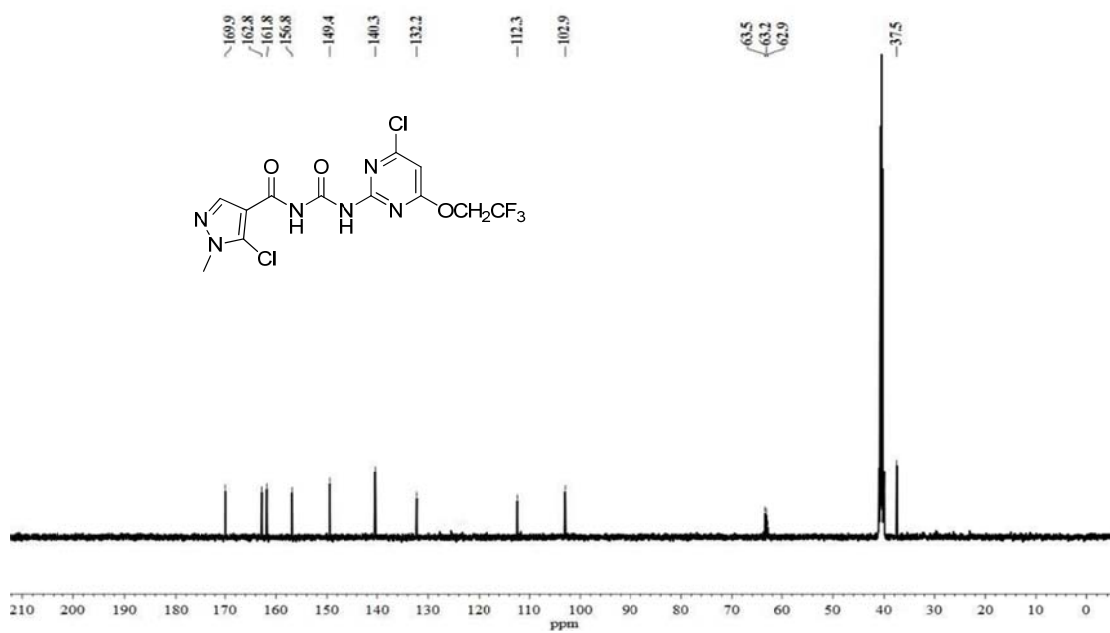

Figure S95 <sup>13</sup>C NMR spectra of compound 35

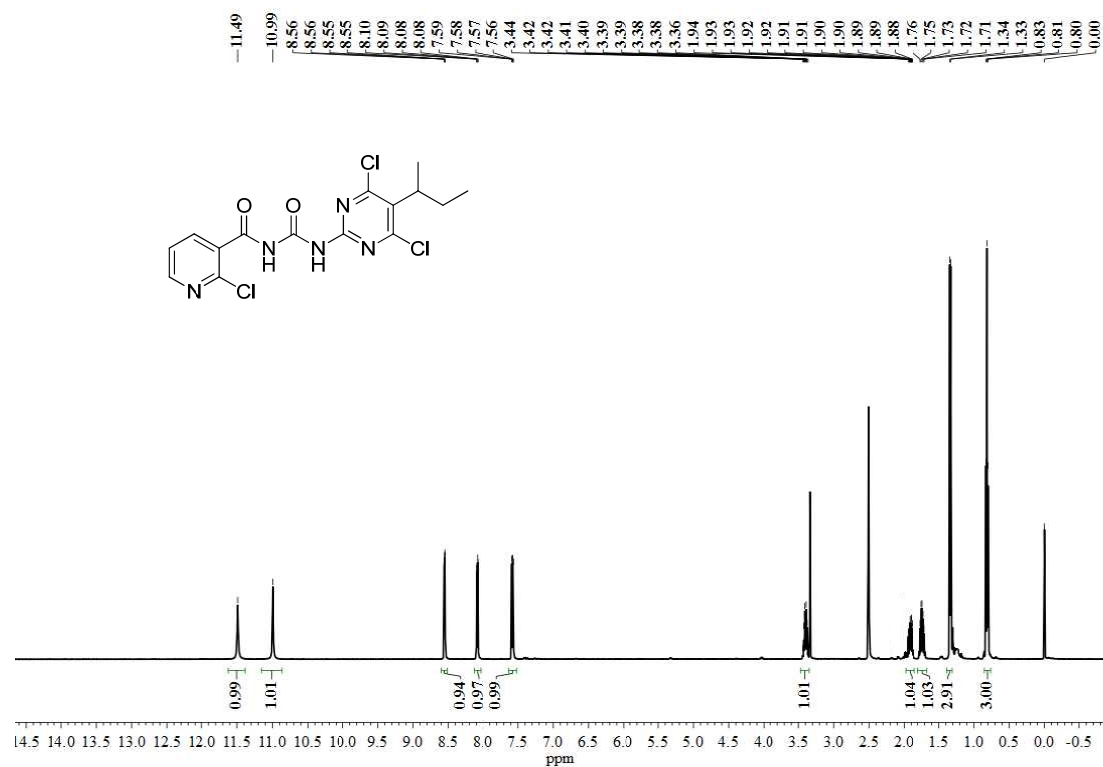

Figure S96 <sup>1</sup>H NMR spectra of compound 36

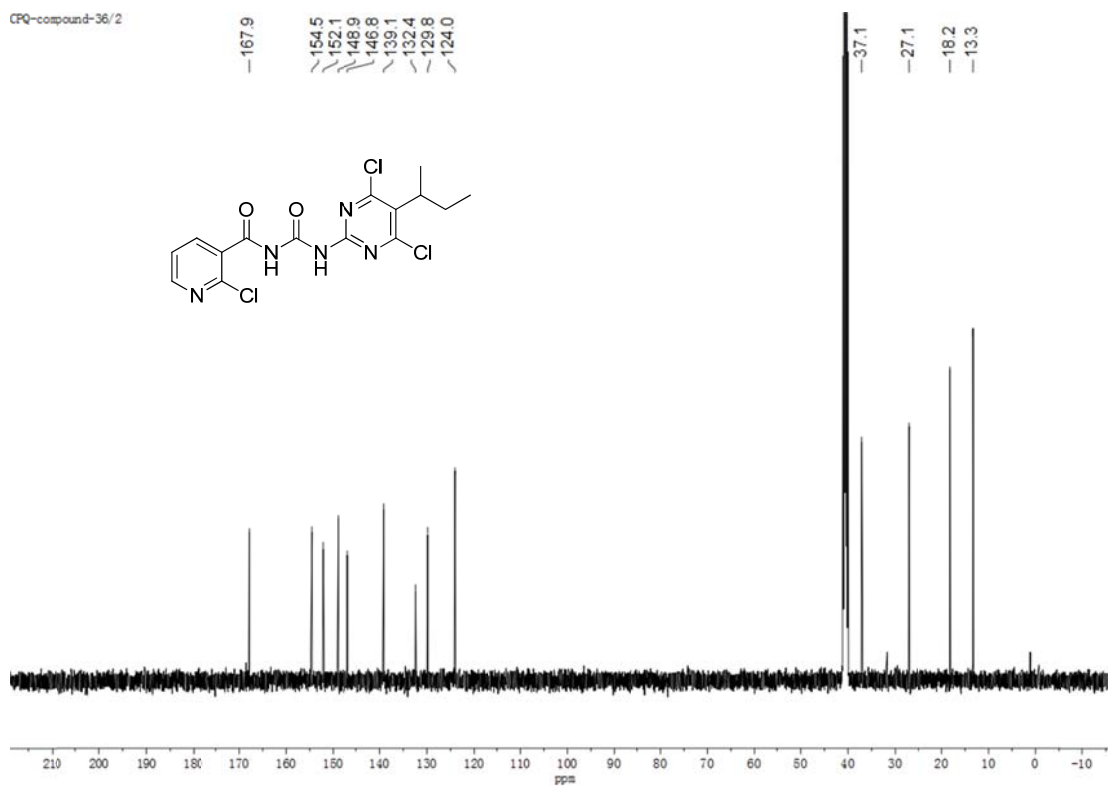

Figure S97 <sup>13</sup>C NMR spectra of compound 36

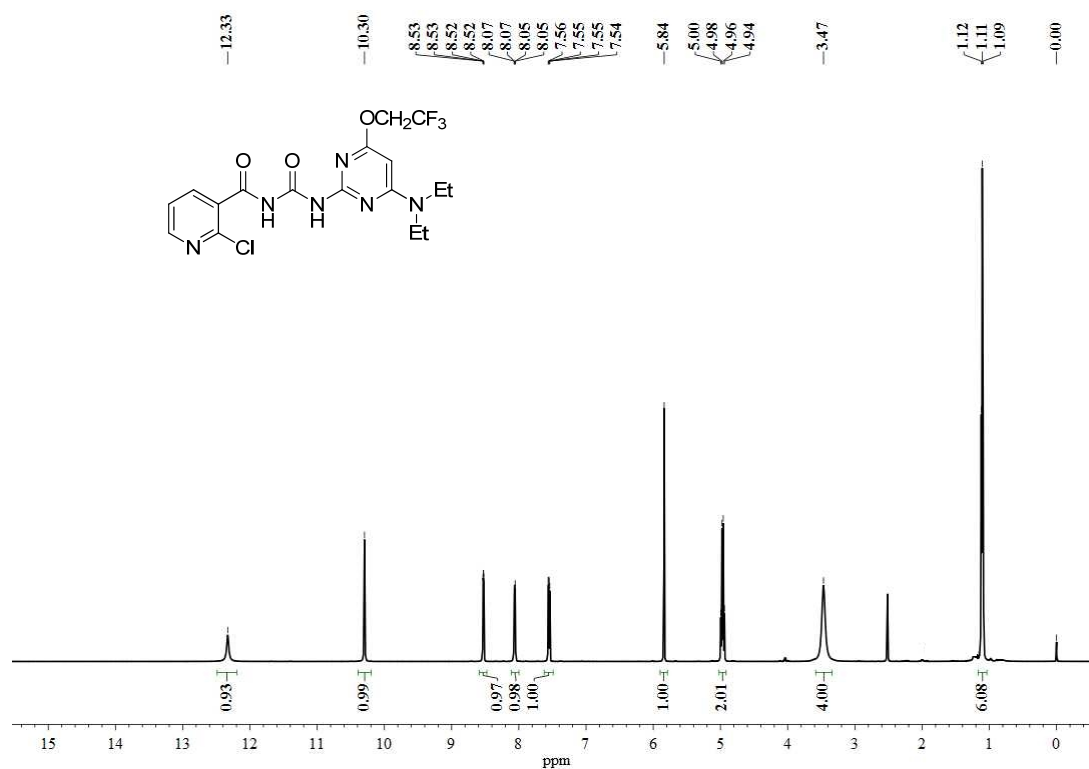

Figure S98  $^1\text{H}$  NMR spectra of compound 37

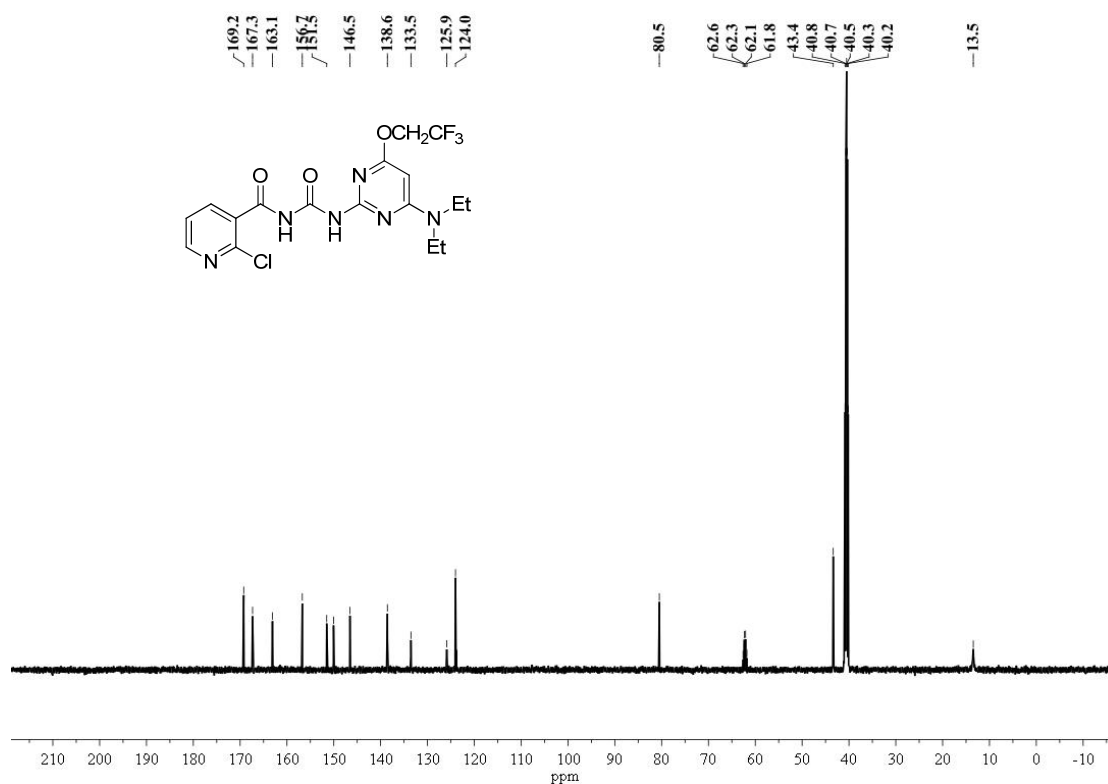

Figure S99  $^{13}\text{C}$  NMR spectra of compound 37

38/1

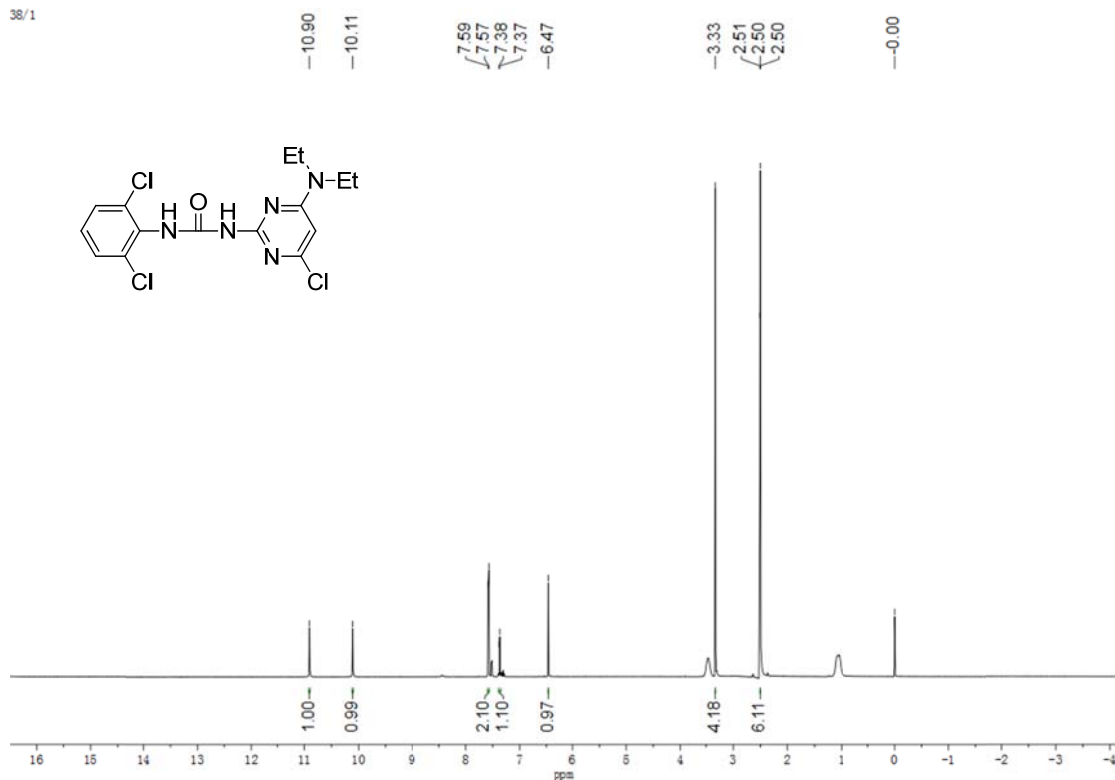Figure S100 <sup>1</sup>H NMR spectra of compound 38

38/2

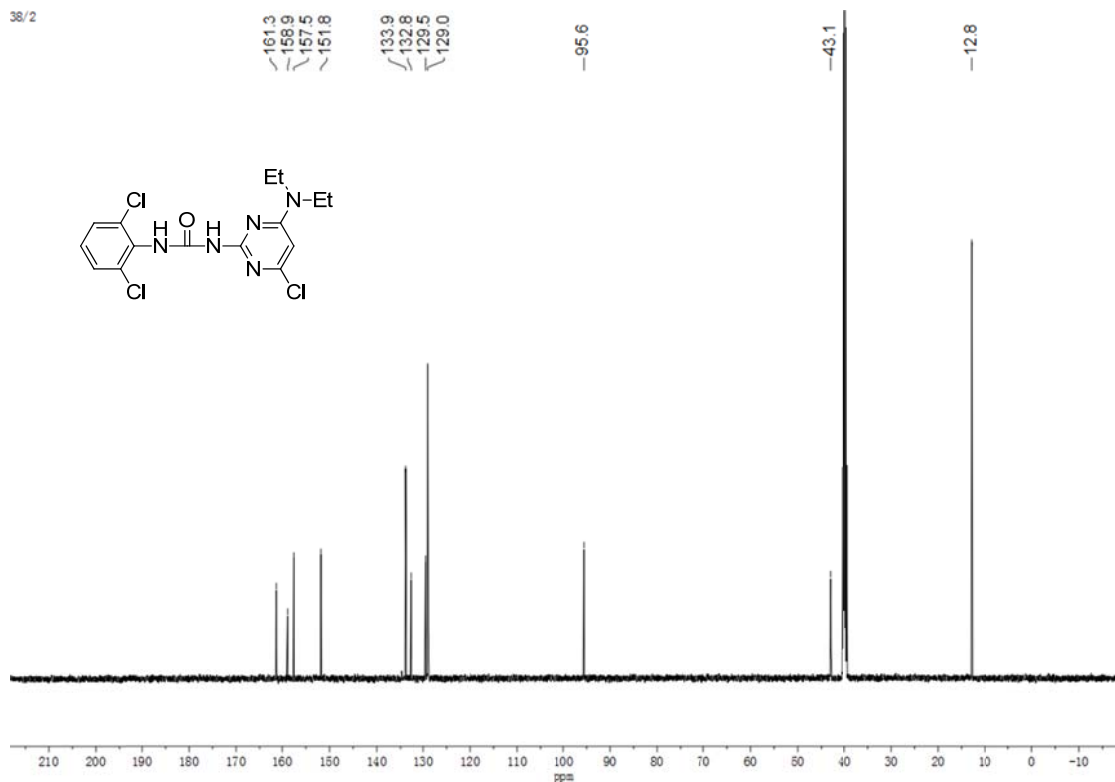Figure S101 <sup>13</sup>C NMR spectra of compound 38

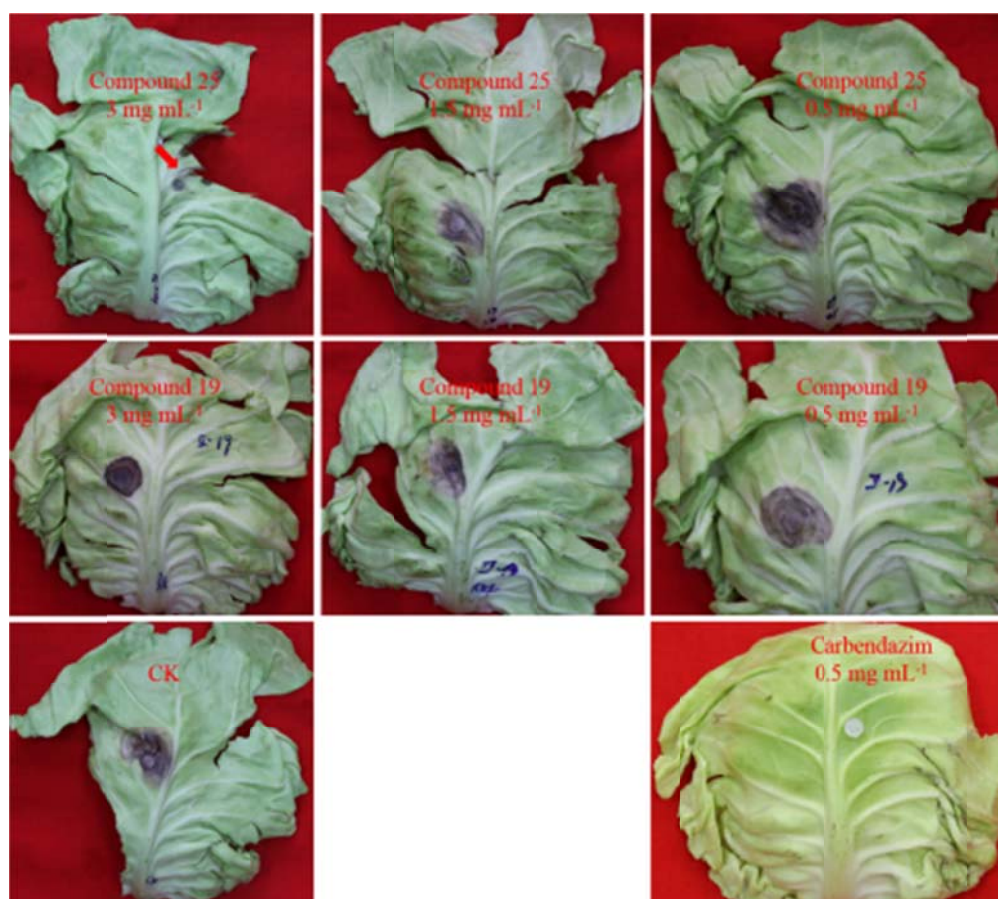

Figure S102 Photo for Protective activity of compounds
